# Supplementary material for: Gene Expression Differences between Enriched Normal and Chronic Myelogenous Leukemia Quiescent Stem/Progenitor Cells and Correlations with Biological Abnormalities
Source: Hindawi journal article supplement (doi:10.1155/2011/798592), 2011-01-01
Supplement: f1 [file 798592.f1.zip]

|                            |                            |
|----------------------------|----------------------------|
| CTGCACCACCAACTGCTTAG       | GAPDH Forward              |
| GGCCATCCACAGTCTTCTG        | GAPDH Reverse              |
| GCCTGGAGGAGCTGTACC         | CPI-17 F.                  |
| GATTTTCCGGCTTCTCTCCT       | CPI-17 R.                  |
| GCAGACACGCGGGAGAAAAC       | ADAMTS3 F.                 |
| TGCGCACCAGGACCACATT        | ADAMTS3 V.                 |
| GCCGACATTGCCTCCTACCAG      | NEFH F.                    |
| GCCAAAGCCAATCCGACACTCT     | NEFH F.                    |
| CCGTCCTGTCCTGGCTGCTC       | RRM2 F.                    |
| CCGGCGGGCGTGTTCTCC         | RRM2 R.                    |
| ATGTTCCGAACCCCAAGAAT       | Leptin Receptor F.         |
| AGTTGGCACATTGGGTTCAT       | Leptin Receptor R.         |
| CTCTTCGCTACCCAGGTGAC       | GATA3 F.                   |
| GTAAAAAGGGGCGACGACTC       | GATA3 R.                   |
| CTCAGTGTTGGTGTGGTGATG      | CD36 F.                    |
| CACAAATTGGTTTGTGCTTGA      | CD36 R                     |
| GTGACCTCAGCCCCTCACT        | Integrin alpha 2b F.       |
| CGGGATGGCTACAATGACA        | Integrin alpha 2b R.       |
| CATTTGTGGGGTGAATTCCT       | Hemoglobin-D F.            |
| AGCTGCACTGTGACAAGCTG       | Hemoglobin-D R.            |
| CCCTGATGACCTGAAGGATG       | Hepatic leukemia factor F. |
| TGGCGATCTGGTTCTCTTTC       | Hepatic leukemia factor R. |
| TTTCAAATTTCTGCATTCACG      | Anphiregulin F.            |
| TCATGGACTTTTCCCCACA        | Anphiregulin R.            |
| ATGGCAACTCTGATCCCAAC       | Protocadherin9 F.          |
| ATCGAGTGACCCAAAACCAA       | Protocadherin9 R.          |
| TGGTGATCAAAATATCTGATCTTACC | CRHBP F.                   |
| GCAGCTCCACAAAGTCTCCT       | CRHBP R.                   |
| GCTGATGTTGAAACTGCTTGA      | CD133 F.                   |
| TTGCTCCTGGATTTGGAAAG       | CD133 R.                   |
| TGAAAGTCTTCAGAATGGAAGGA    | Ki67 F                     |
| GGTCAGAAGAGAAGCTAGATCTTGAG | Ki67 R.                    |

Table.1 Primers used for qRT-PCR
