# Supplementary material for: Gene Expression Differences between Enriched Normal and Chronic Myelogenous Leukemia Quiescent Stem/Progenitor Cells and Correlations with Biological Abnormalities
Source: J Oncol. 2011 Feb 23;2011:798592. doi: 10.1155/2011/798592 (PMC3062978; doi:10.1155/2011/798592)
Supplement: Supplementary file 1 — Table.1 Primers used for qRT-PCR. [file 798592.f1.zip]

Archive with 2 entries (2 files):
- 798592.f1/CML-NOR_G0 sup data.xls
- 798592.f1/Supp dat.pdf
