# Supplementary material for: Gene Expression Differences between Enriched Normal and Chronic Myelogenous Leukemia Quiescent Stem/Progenitor Cells and Correlations with Biological Abnormalities
Source: J Oncol. 2011 Feb 23;2011:798592. doi: 10.1155/2011/798592 (PMC3062978; doi:10.1155/2011/798592)
Supplement: Supplementary file 1 — Table.1 Primers used for qRT-PCR. [file 798592.f1.zip › 798592.f1/CML-NOR_G0 sup data.xls]

## Sheet: CML-NOR_G0.xls
ProbeID	FChg	qvalue	Gene.Symbol	Gene.Title	unigene	Gene.Ontology.Biological.Process	Gene.Ontology.Molecular.Function	Pathway
209894_at	20.64	0.0191876	LEPR	leptin receptor	23581	6112 // energy reserve metabolism // traceable author statement /// 7166 // cell surface receptor linked signal transduction // traceable author statement /// 7275 // development // traceable author statement	4896 // hematopoietin/interferon-class (D200-domain) cytokine receptor activity // inferred from electronic annotation /// 4872 // receptor activity // inferred from electronic annotation /// 4888 // transmembrane receptor activity // traceable author statement	---
228766_at	21.63	0.00676739	---	---	---	---	---	---
206488_s_at	19.75	0.00619008	CD36	CD36 molecule (thrombospondin receptor)	120949	6629 // lipid metabolism // non-traceable author statement /// 6631 // fatty acid metabolism // not recorded /// 6810 // transport // inferred from electronic annotation /// 7155 // cell adhesion // traceable author statement /// 7596 // blood coagulation // traceable author statement /// 7155 // cell adhesion // inferred from electronic annotation	4872 // receptor activity // inferred from electronic annotation /// 5515 // protein binding // inferred from electronic annotation	---
209555_s_at	19.34	0.00697104	CD36	CD36 molecule (thrombospondin receptor)	120949	6629 // lipid metabolism // non-traceable author statement /// 6631 // fatty acid metabolism // not recorded /// 6810 // transport // inferred from electronic annotation /// 7155 // cell adhesion // traceable author statement /// 7596 // blood coagulation // traceable author statement /// 7155 // cell adhesion // inferred from electronic annotation	4872 // receptor activity // inferred from electronic annotation /// 5515 // protein binding // inferred from electronic annotation	---
206834_at	18.49	0.00353949	HBD	hemoglobin, delta /// hemoglobin, delta	591988	6810 // transport // inferred from electronic annotation /// 15671 // oxygen transport // inferred from electronic annotation	5344 // oxygen transporter activity // inferred from electronic annotation /// 5506 // iron ion binding // inferred from electronic annotation /// 19825 // oxygen binding // inferred from electronic annotation /// 20037 // heme binding // inferred from electronic annotation /// 46872 // metal ion binding // inferred from electronic annotation /// 5488 // binding // inferred from electronic annota…	---
213515_x_at	17.37	0.0476644	HBG1 /// HBG2	hemoglobin, gamma A /// hemoglobin, gamma A /// hemoglobin, gamma G /// hemoglobin, gamma G	302145	6810 // transport // inferred from electronic annotation /// 15671 // oxygen transport // inferred from electronic annotation	5344 // oxygen transporter activity // inferred from electronic annotation /// 5506 // iron ion binding // inferred from electronic annotation /// 19825 // oxygen binding // inferred from electronic annotation /// 20037 // heme binding // inferred from electronic annotation /// 46872 // metal ion binding // inferred from electronic annotation /// 3774 // motor activity // inferred from electronic…	Ribosomal_Proteins // GenMAPP /// Smooth_muscle_contraction // GenMAPP /// Striated_muscle_contraction // GenMAPP
209116_x_at	13.43	0.0462854	HBB	hemoglobin, beta /// hemoglobin, beta	523443	6810 // transport // inferred from electronic annotation /// 15671 // oxygen transport // inferred from electronic annotation /// 15671 // oxygen transport // non-traceable author statement /// 15671 // oxygen transport // traceable author statement /// 30185 // nitric oxide transport // non-traceable author statement /// 45429 // positive regulation of nitric oxide biosynthesis // non-traceable …	5344 // oxygen transporter activity // inferred from electronic annotation /// 5344 // oxygen transporter activity // non-traceable author statement /// 5488 // binding // inferred from electronic annotation /// 5506 // iron ion binding // inferred from electronic annotation /// 8430 // selenium binding // inferred from direct assay /// 19825 // oxygen binding // inferred from direct assay /// 19…	---
220807_at	3.29	0.0296295	HBQ1	hemoglobin, theta 1 /// hemoglobin, theta 1	247921	6810 // transport // inferred from electronic annotation /// 15671 // oxygen transport // traceable author statement /// 15671 // oxygen transport // inferred from electronic annotation	5344 // oxygen transporter activity // inferred from electronic annotation /// 5506 // iron ion binding // inferred from electronic annotation /// 19825 // oxygen binding // inferred from electronic annotation /// 20037 // heme binding // inferred from electronic annotation /// 46872 // metal ion binding // inferred from electronic annotation /// 5488 // binding // inferred from electronic annota…	---
210663_s_at	2.42	0.0458952	KYNU	kynureninase (L-kynurenine hydrolase)	470126	6569 // tryptophan catabolism // inferred from electronic annotation /// 8152 // metabolism // inferred from electronic annotation /// 9435 // NAD biosynthesis // inferred from electronic annotation /// 19363 // pyridine nucleotide biosynthesis // inferred from electronic annotation /// 6569 // tryptophan catabolism // not recorded	8233 // peptidase activity // traceable author statement /// 8483 // transaminase activity // inferred from electronic annotation /// 16787 // hydrolase activity // inferred from electronic annotation /// 30170 // pyridoxal phosphate binding // inferred from electronic annotation /// 30429 // kynureninase activity // inferred from electronic annotation	Tryptophan metabolism // KEGG
217388_s_at	17.34	0.0206838	KYNU	kynureninase (L-kynurenine hydrolase)	470126	6569 // tryptophan catabolism // inferred from electronic annotation /// 8152 // metabolism // inferred from electronic annotation /// 9435 // NAD biosynthesis // inferred from electronic annotation /// 19363 // pyridine nucleotide biosynthesis // inferred from electronic annotation /// 6569 // tryptophan catabolism // not recorded	8233 // peptidase activity // traceable author statement /// 8483 // transaminase activity // inferred from electronic annotation /// 16787 // hydrolase activity // inferred from electronic annotation /// 30170 // pyridoxal phosphate binding // inferred from electronic annotation /// 30429 // kynureninase activity // inferred from electronic annotation	Tryptophan metabolism // KEGG
238206_at	9.16	0.000892962	---	Transcribed locus, strongly similar to NP_067647.1 leucine-rich repeat-containing G protein-coupled receptor 7 [Homo sapiens]	196119	---	---	---
226751_at	8.93	0.00259431	C2orf32	chromosome 2 open reading frame 32	212885	---	5515 // protein binding // inferred from physical interaction	---
206698_at	8.75	0.0249876	XK	X-linked Kx blood group (McLeod syndrome)	78919	6810 // transport // traceable author statement /// 6865 // amino acid transport // inferred from electronic annotation /// 6810 // transport // inferred from electronic annotation	5215 // transporter activity // traceable author statement /// 5515 // protein binding // inferred from physical interaction /// 15171 // amino acid transporter activity // inferred from electronic annotation	---
227006_at	8.61	0.012486	PPP1R14A	protein phosphatase 1, regulatory (inhibitor) subunit 14A	631569	---	4864 // protein phosphatase inhibitor activity // inferred from electronic annotation	---
201669_s_at	8.21	0.00235877	MARCKS	myristoylated alanine-rich protein kinase C substrate	519909	6928 // cell motility // not recorded	5516 // calmodulin binding // traceable author statement /// 51015 // actin filament binding // traceable author statement /// 3779 // actin binding // inferred from electronic annotation /// 5516 // calmodulin binding // inferred from electronic annotation	---
242881_x_at	7.84	0.00201091	---	Homo sapiens, clone IMAGE:3932143, mRNA	633951	---	---	---
209605_at	7.17	0.00138382	TST	thiosulfate sulfurtransferase (rhodanese)	474783	8272 // sulfate transport // inferred from electronic annotation /// 9440 // cyanate catabolism // traceable author statement	4792 // thiosulfate sulfurtransferase activity // traceable author statement /// 16740 // transferase activity // inferred from electronic annotation /// 4792 // thiosulfate sulfurtransferase activity // inferred from electronic annotation	---
1558290_a_at	7.08	0.00247475	PVT1 /// LOC441378	Pvt1 oncogene homolog, MYC activator (mouse) /// hypothetical LOC441378	133107	---	---	---
204416_x_at	6.98	0.00490787	APOC1	apolipoprotein C-I	---	6629 // lipid metabolism // traceable author statement /// 6869 // lipid transport // inferred from electronic annotation /// 42157 // lipoprotein metabolism // inferred from electronic annotation /// 6810 // transport // inferred from electronic annotation	5319 // lipid transporter activity // inferred from electronic annotation	Statin_Pathway_PharmGKB // GenMAPP
210504_at	6.97	0.00701359	KLF1	Kruppel-like factor 1 (erythroid)	37860	6350 // transcription // inferred from electronic annotation /// 6355 // regulation of transcription, DNA-dependent // inferred from electronic annotation /// 6366 // transcription from RNA polymerase II promoter // not recorded /// 9887 // organ morphogenesis // not recorded	3700 // transcription factor activity // traceable author statement /// 3713 // transcription coactivator activity // not recorded /// 8270 // zinc ion binding // inferred from electronic annotation /// 46872 // metal ion binding // inferred from electronic annotation /// 3676 // nucleic acid binding // inferred from electronic annotation /// 3677 // DNA binding // inferred from electronic annota…	---
206494_s_at	6.51	0.0165552	ITGA2B	integrin, alpha 2b (platelet glycoprotein IIb of IIb/IIIa complex, antigen CD41)	411312	7155 // cell adhesion // traceable author statement /// 7229 // integrin-mediated signaling pathway // inferred from electronic annotation /// 30168 // platelet activation // inferred from sequence or structural similarity /// 7155 // cell adhesion // inferred from electronic annotation /// 7155 // cell adhesion // non-traceable author statement /// 6508 // proteolysis // inferred from electronic…	4872 // receptor activity // inferred from electronic annotation /// 5509 // calcium ion binding // inferred from electronic annotation /// 42802 // identical protein binding // inferred from physical interaction /// 5515 // protein binding // inferred from electronic annotation /// 4182 // carboxypeptidase A activity // inferred from electronic annotation	Integrin-mediated_cell_adhesion_KEGG // GenMAPP
216474_x_at	6.22	0.0327304	TPSAB1	tryptase alpha/beta 1	405479	6508 // proteolysis // inferred from electronic annotation /// 6952 // defense response // traceable author statement /// 6508 // proteolysis // non-traceable author statement	4252 // serine-type endopeptidase activity // inferred from electronic annotation /// 8233 // peptidase activity // inferred from electronic annotation /// 30019 // tryptase activity // inferred from electronic annotation /// 30019 // tryptase activity // non-traceable author statement /// 16787 // hydrolase activity // inferred from electronic annotation /// 8236 // serine-type peptidase activit…	---
203040_s_at	6.13	0.00201091	HMBS	hydroxymethylbilane synthase	82609	6783 // heme biosynthesis // inferred from electronic annotation /// 6779 // porphyrin biosynthesis // inferred from electronic annotation	4418 // hydroxymethylbilane synthase activity // traceable author statement /// 16740 // transferase activity // inferred from electronic annotation /// 4418 // hydroxymethylbilane synthase activity // inferred from electronic annotation	Heme_Biosynthesis // GenMAPP /// Porphyrin and chlorophyll metabolism // KEGG
201590_x_at	6.01	0.00879855	ANXA2	annexin A2	511605	1501 // skeletal development // traceable author statement	4859 // phospholipase inhibitor activity // inferred from electronic annotation /// 4859 // phospholipase inhibitor activity // traceable author statement /// 5509 // calcium ion binding // inferred from electronic annotation /// 5544 // calcium-dependent phospholipid binding // inferred from electronic annotation /// 8092 // cytoskeletal protein binding // inferred from electronic annotation	Prostaglandin_synthesis_regulation // GenMAPP
216920_s_at	5.94	0.0367583	TRGC2 /// TRGV2 /// TRGV9 /// TARP /// LOC642083	T cell receptor gamma constant 2 /// T cell receptor gamma variable 2 /// T cell receptor gamma variable 9 /// TCR gamma alternate reading frame protein /// hypothetical protein LOC642083	534032	16066 // cellular defense response (sensu Vertebrata) // non-traceable author statement /// 6955 // immune response // non-traceable author statement	42287 // MHC protein binding // non-traceable author statement /// 42605 // peptide antigen binding // non-traceable author statement /// 4872 // receptor activity // inferred from electronic annotation	---
210427_x_at	5.75	0.010203	ANXA2	annexin A2	511605	1501 // skeletal development // traceable author statement	4859 // phospholipase inhibitor activity // inferred from electronic annotation /// 4859 // phospholipase inhibitor activity // traceable author statement /// 5509 // calcium ion binding // inferred from electronic annotation /// 5544 // calcium-dependent phospholipid binding // inferred from electronic annotation /// 8092 // cytoskeletal protein binding // inferred from electronic annotation	Prostaglandin_synthesis_regulation // GenMAPP
224822_at	5.73	0.000997882	DLC1	deleted in liver cancer 1	134296	7010 // cytoskeleton organization and biogenesis // non-traceable author statement /// 7165 // signal transduction // traceable author statement /// 30155 // regulation of cell adhesion // non-traceable author statement /// 30308 // negative regulation of cell growth // inferred from direct assay /// 7165 // signal transduction // inferred from electronic annotation	5100 // Rho GTPase activator activity // non-traceable author statement /// 5515 // protein binding // non-traceable author statement /// 5096 // GTPase activator activity // inferred from electronic annotation /// 5096 // GTPase activator activity // traceable author statement	---
204976_s_at	5.65	0.00356764	AMMECR1	Alport syndrome, mental retardation, midface hypoplasia and elliptocytosis chromosomal region, gene 1	481208	6813 // potassium ion transport // inferred from electronic annotation	5249 // voltage-gated potassium channel activity // inferred from electronic annotation /// 5515 // protein binding // inferred from electronic annotation	---
203037_s_at	5.58	0.000642537	MTSS1	metastasis suppressor 1	336994	6928 // cell motility // non-traceable author statement /// 7049 // cell cycle // inferred from electronic annotation /// 7155 // cell adhesion // non-traceable author statement /// 7169 // transmembrane receptor protein tyrosine kinase signaling pathway // traceable author statement /// 7399 // nervous system development // inferred from sequence or structural similarity /// 7517 // muscle devel…	3785 // actin monomer binding // inferred from direct assay /// 5102 // receptor binding // inferred from physical interaction /// 3779 // actin binding // inferred from electronic annotation	---
209773_s_at	5.57	0.0164594	RRM2	ribonucleotide reductase M2 polypeptide	226390	6260 // DNA replication // non-traceable author statement /// 9186 // deoxyribonucleoside diphosphate metabolism // inferred from electronic annotation /// 6260 // DNA replication // inferred from electronic annotation	4748 // ribonucleoside-diphosphate reductase activity // non-traceable author statement /// 5506 // iron ion binding // inferred from electronic annotation /// 16491 // oxidoreductase activity // inferred from electronic annotation /// 46872 // metal ion binding // inferred from electronic annotation /// 4748 // ribonucleoside-diphosphate reductase activity // inferred from electronic annotation	Purine metabolism // KEGG /// Pyrimidine metabolism // KEGG
210215_at	5.56	0.0252982	TFR2	transferrin receptor 2	544932	6508 // proteolysis // inferred from electronic annotation /// 6826 // iron ion transport // non-traceable author statement /// 6879 // iron ion homeostasis // traceable author statement	4872 // receptor activity // inferred from electronic annotation /// 4998 // transferrin receptor activity // non-traceable author statement /// 8233 // peptidase activity // inferred from electronic annotation	---
205683_x_at	5.54	0.0408121	TPSAB1	tryptase alpha/beta 1	405479	6508 // proteolysis // inferred from electronic annotation /// 6952 // defense response // traceable author statement /// 6508 // proteolysis // non-traceable author statement	4252 // serine-type endopeptidase activity // inferred from electronic annotation /// 8233 // peptidase activity // inferred from electronic annotation /// 30019 // tryptase activity // inferred from electronic annotation /// 30019 // tryptase activity // non-traceable author statement /// 16787 // hydrolase activity // inferred from electronic annotation /// 8236 // serine-type peptidase activit…	---
207067_s_at	5.48	0.036073	HDC	histidine decarboxylase	1481	6519 // amino acid and derivative metabolism // inferred from electronic annotation /// 6547 // histidine metabolism // traceable author statement /// 19752 // carboxylic acid metabolism // inferred from electronic annotation /// 42423 // catecholamine biosynthesis // inferred from electronic annotation	4398 // histidine decarboxylase activity // traceable author statement /// 16829 // lyase activity // inferred from electronic annotation /// 4398 // histidine decarboxylase activity // inferred from electronic annotation /// 16831 // carboxy-lyase activity // inferred from electronic annotation	Biogenic_Amine_Synthesis // GenMAPP /// Histidine metabolism // KEGG
219990_at	5.45	0.0137256	E2F8	E2F transcription factor 8	523526	74 // regulation of progression through cell cycle // inferred from electronic annotation /// 6350 // transcription // inferred from electronic annotation /// 6355 // regulation of transcription, DNA-dependent // inferred from electronic annotation	3677 // DNA binding // inferred from electronic annotation /// 3700 // transcription factor activity // inferred from electronic annotation	---
207134_x_at	5.45	0.0341482	TPSAB1	tryptase alpha/beta 1	405479	6508 // proteolysis // inferred from electronic annotation /// 6952 // defense response // traceable author statement /// 6508 // proteolysis // non-traceable author statement	4252 // serine-type endopeptidase activity // inferred from electronic annotation /// 8233 // peptidase activity // inferred from electronic annotation /// 30019 // tryptase activity // inferred from electronic annotation /// 30019 // tryptase activity // non-traceable author statement /// 16787 // hydrolase activity // inferred from electronic annotation /// 8236 // serine-type peptidase activit…	---
211356_x_at	5.37	0.0274761	LEPR	leptin receptor	23581	6112 // energy reserve metabolism // traceable author statement /// 7166 // cell surface receptor linked signal transduction // traceable author statement /// 7275 // development // traceable author statement	4896 // hematopoietin/interferon-class (D200-domain) cytokine receptor activity // inferred from electronic annotation /// 4872 // receptor activity // inferred from electronic annotation /// 4888 // transmembrane receptor activity // traceable author statement	---
215806_x_at	5.37	0.0398665	TRGC2 /// TRGV2 /// TRGV9 /// TARP /// LOC642083	T cell receptor gamma constant 2 /// T cell receptor gamma variable 2 /// T cell receptor gamma variable 9 /// TCR gamma alternate reading frame protein /// hypothetical protein LOC642083	534032	16066 // cellular defense response (sensu Vertebrata) // non-traceable author statement /// 6955 // immune response // non-traceable author statement	42287 // MHC protein binding // non-traceable author statement /// 42605 // peptide antigen binding // non-traceable author statement /// 4872 // receptor activity // inferred from electronic annotation	---
231804_at	5.36	0.00157793	RXFP1	relaxin/insulin-like family peptide receptor 1	591686	7165 // signal transduction // inferred from electronic annotation /// 7186 // G-protein coupled receptor protein signaling pathway // inferred from electronic annotation	1584 // rhodopsin-like receptor activity // inferred from electronic annotation /// 4872 // receptor activity // inferred from electronic annotation /// 4930 // G-protein coupled receptor activity // inferred from direct assay /// 4930 // G-protein coupled receptor activity // inferred from electronic annotation /// 4871 // signal transducer activity // inferred from electronic annotation	GPCRDB_Other // GenMAPP /// Smooth_muscle_contraction // GenMAPP
213503_x_at	5.31	0.0128072	ANXA2	annexin A2	511605	1501 // skeletal development // traceable author statement	4859 // phospholipase inhibitor activity // inferred from electronic annotation /// 4859 // phospholipase inhibitor activity // traceable author statement /// 5509 // calcium ion binding // inferred from electronic annotation /// 5544 // calcium-dependent phospholipid binding // inferred from electronic annotation /// 8092 // cytoskeletal protein binding // inferred from electronic annotation	Prostaglandin_synthesis_regulation // GenMAPP
226421_at	5.25	0.00923642	AMMECR1	Alport syndrome, mental retardation, midface hypoplasia and elliptocytosis chromosomal region, gene 1	481208	---	---	---
211355_x_at	5.2	0.0210355	LEPR	leptin receptor	23581	6112 // energy reserve metabolism // traceable author statement /// 7166 // cell surface receptor linked signal transduction // traceable author statement /// 7275 // development // traceable author statement	4896 // hematopoietin/interferon-class (D200-domain) cytokine receptor activity // inferred from electronic annotation /// 4872 // receptor activity // inferred from electronic annotation /// 4888 // transmembrane receptor activity // traceable author statement	---
223599_at	5.19	0.00503964	TRIM6	tripartite motif-containing 6	---	---	5515 // protein binding // inferred from electronic annotation /// 8270 // zinc ion binding // inferred from electronic annotation /// 46872 // metal ion binding // inferred from electronic annotation	---
201890_at	5.14	0.0244331	RRM2	ribonucleotide reductase M2 polypeptide	226390	6260 // DNA replication // non-traceable author statement /// 9186 // deoxyribonucleoside diphosphate metabolism // inferred from electronic annotation /// 6260 // DNA replication // inferred from electronic annotation	4748 // ribonucleoside-diphosphate reductase activity // non-traceable author statement /// 5506 // iron ion binding // inferred from electronic annotation /// 16491 // oxidoreductase activity // inferred from electronic annotation /// 46872 // metal ion binding // inferred from electronic annotation /// 4748 // ribonucleoside-diphosphate reductase activity // inferred from electronic annotation	Purine metabolism // KEGG /// Pyrimidine metabolism // KEGG
211354_s_at	5.1	0.0281689	LEPR	leptin receptor	23581	6112 // energy reserve metabolism // traceable author statement /// 7166 // cell surface receptor linked signal transduction // traceable author statement /// 7275 // development // traceable author statement	4896 // hematopoietin/interferon-class (D200-domain) cytokine receptor activity // inferred from electronic annotation /// 4872 // receptor activity // inferred from electronic annotation /// 4888 // transmembrane receptor activity // traceable author statement	---
210762_s_at	5.05	0.00234662	DLC1	deleted in liver cancer 1	134296	7010 // cytoskeleton organization and biogenesis // non-traceable author statement /// 7165 // signal transduction // traceable author statement /// 30155 // regulation of cell adhesion // non-traceable author statement /// 30308 // negative regulation of cell growth // inferred from direct assay /// 7165 // signal transduction // inferred from electronic annotation	5100 // Rho GTPase activator activity // non-traceable author statement /// 5515 // protein binding // non-traceable author statement /// 5096 // GTPase activator activity // inferred from electronic annotation /// 5096 // GTPase activator activity // traceable author statement	---
210036_s_at	5.03	0.0109289	KCNH2	potassium voltage-gated channel, subfamily H (eag-related), member 2	---	160 // two-component signal transduction system (phosphorelay) // inferred from electronic annotation /// 6355 // regulation of transcription, DNA-dependent // inferred from electronic annotation /// 6811 // ion transport // inferred from electronic annotation /// 6813 // potassium ion transport // traceable author statement /// 6936 // muscle contraction // traceable author statement /// 7605 //…	155 // two-component sensor activity // inferred from electronic annotation /// 5251 // delayed rectifier potassium channel activity // traceable author statement /// 30955 // potassium ion binding // inferred from electronic annotation /// 4871 // signal transducer activity // inferred from electronic annotation /// 5216 // ion channel activity // inferred from electronic annotation /// 5244 // …	---
202201_at	5.02	0.00280338	BLVRB	biliverdin reductase B (flavin reductase (NADPH))	515785	44237 // cellular metabolism // inferred from electronic annotation	4074 // biliverdin reductase activity // traceable author statement /// 16491 // oxidoreductase activity // inferred from electronic annotation /// 42602 // flavin reductase activity // inferred from electronic annotation /// 50662 // coenzyme binding // inferred from electronic annotation /// 3824 // catalytic activity // inferred from electronic annotation /// 4074 // biliverdin reductase activ…	Porphyrin and chlorophyll metabolism // KEGG
210084_x_at	4.96	0.0340556	TPSAB1	tryptase alpha/beta 1	405479	6508 // proteolysis // inferred from electronic annotation /// 6952 // defense response // traceable author statement /// 6508 // proteolysis // non-traceable author statement	4252 // serine-type endopeptidase activity // inferred from electronic annotation /// 8233 // peptidase activity // inferred from electronic annotation /// 30019 // tryptase activity // inferred from electronic annotation /// 30019 // tryptase activity // non-traceable author statement /// 16787 // hydrolase activity // inferred from electronic annotation /// 8236 // serine-type peptidase activit…	---
209813_x_at	4.94	0.0395965	TRGC2 /// TRGV2 /// TRGV9 /// TARP /// LOC642083	T cell receptor gamma constant 2 /// T cell receptor gamma constant 2 /// T cell receptor gamma variable 2 /// T cell receptor gamma variable 2 /// T cell receptor gamma variable 9 /// T cell receptor gamma variable 9 /// TCR gamma alternate reading frame protein /// TCR gamma alternate reading frame protein /// hypothetical protein LOC642083 /// hypothetical protein LOC642083	534032	16066 // cellular defense response (sensu Vertebrata) // non-traceable author statement /// 6955 // immune response // non-traceable author statement	42287 // MHC protein binding // non-traceable author statement /// 42605 // peptide antigen binding // non-traceable author statement /// 4872 // receptor activity // inferred from electronic annotation	---
210986_s_at	4.79	0.0126879	TPM1	tropomyosin 1 (alpha)	133892	6928 // cell motility // traceable author statement /// 6937 // regulation of muscle contraction // traceable author statement /// 8016 // regulation of heart contraction // traceable author statement /// 6633 // fatty acid biosynthesis // inferred from electronic annotation	3779 // actin binding // inferred from electronic annotation /// 5200 // structural constituent of cytoskeleton // inferred from electronic annotation /// 8307 // structural constituent of muscle // traceable author statement /// 3743 // translation initiation factor activity // inferred from electronic annotation /// 3824 // catalytic activity // inferred from electronic annotation	Striated_muscle_contraction // GenMAPP /// Striated_muscle_contraction // GenMAPP /// Striated_muscle_contraction // GenMAPP
229305_at	4.76	0.00681227	MLF1IP	MLF1 interacting protein	575032	6350 // transcription // inferred from electronic annotation /// 6355 // regulation of transcription, DNA-dependent // inferred from electronic annotation	---	---
204780_s_at	4.76	0.018589	FAS	Fas (TNF receptor superfamily, member 6)	244139	6461 // protein complex assembly // traceable author statement /// 6915 // apoptosis // inferred from electronic annotation /// 6916 // anti-apoptosis // traceable author statement /// 6917 // induction of apoptosis // traceable author statement /// 6955 // immune response // inferred from electronic annotation /// 7165 // signal transduction // inferred from electronic annotation /// 7165 // sig…	4888 // transmembrane receptor activity // inferred from electronic annotation /// 5515 // protein binding // inferred from electronic annotation /// 42802 // identical protein binding // inferred from physical interaction /// 5515 // protein binding // inferred from physical interaction /// 4872 // receptor activity // inferred from electronic annotation /// 4871 // signal transducer activity //…	Apoptosis // GenMAPP /// Apoptosis_GenMAPP // GenMAPP /// Apoptosis_KEGG // GenMAPP
206493_at	4.75	0.0222318	ITGA2B	integrin, alpha 2b (platelet glycoprotein IIb of IIb/IIIa complex, antigen CD41)	411312	7155 // cell adhesion // traceable author statement /// 7229 // integrin-mediated signaling pathway // inferred from electronic annotation /// 7155 // cell adhesion // inferred from electronic annotation /// 6508 // proteolysis // inferred from electronic annotation	4872 // receptor activity // inferred from electronic annotation /// 5509 // calcium ion binding // inferred from electronic annotation /// 42802 // identical protein binding // inferred from physical interaction /// 5515 // protein binding // inferred from electronic annotation /// 4182 // carboxypeptidase A activity // inferred from electronic annotation	Integrin-mediated_cell_adhesion_KEGG // GenMAPP
206632_s_at	4.7	0.00292034	APOBEC3B	apolipoprotein B mRNA editing enzyme, catalytic polypeptide-like 3B	226307	---	8270 // zinc ion binding // inferred from electronic annotation /// 16787 // hydrolase activity // inferred from electronic annotation /// 16814 // hydrolase activity, acting on carbon-nitrogen (but not peptide) bonds, in cyclic amidines // inferred from electronic annotation /// 3723 // RNA binding // inferred from electronic annotation /// 46872 // metal ion binding // inferred from electronic …	---
221648_s_at	4.66	0.00977688	C1orf121	Chromosome 1 open reading frame 121	498317	---	---	---
218872_at	4.59	0.00196735	TESC	tescalcin	525709	---	287 // magnesium ion binding // inferred from sequence or structural similarity /// 5509 // calcium ion binding // inferred from sequence or structural similarity /// 5515 // protein binding // inferred from physical interaction /// 19212 // phosphatase inhibitor activity // inferred from sequence or structural similarity /// 5509 // calcium ion binding // inferred from electronic annotation	---
203561_at	4.58	0.00191797	FCGR2A	Fc fragment of IgG, low affinity IIa, receptor (CD32)	---	6955 // immune response // not recorded	4872 // receptor activity // inferred from electronic annotation /// 5057 // receptor signaling protein activity // not recorded /// 19864 // IgG binding // inferred from electronic annotation	---
211144_x_at	4.58	0.0461762	TRGC2 /// TRGV2 /// TRGV9 /// TARP /// LOC642083	T cell receptor gamma constant 2 /// T cell receptor gamma variable 2 /// T cell receptor gamma variable 9 /// TCR gamma alternate reading frame protein /// hypothetical protein LOC642083	534032	16066 // cellular defense response (sensu Vertebrata) // non-traceable author statement /// 6955 // immune response // non-traceable author statement	42287 // MHC protein binding // non-traceable author statement /// 42605 // peptide antigen binding // non-traceable author statement /// 4872 // receptor activity // inferred from electronic annotation	---
218424_s_at	4.53	0.000321651	STEAP3	STEAP family member 3	591551	6118 // electron transport // inferred from electronic annotation /// 9306 // protein secretion // inferred from direct assay	5506 // iron ion binding // inferred from electronic annotation /// 16491 // oxidoreductase activity // inferred from electronic annotation /// 50660 // FAD binding // inferred from electronic annotation	---
225767_at	4.53	0.0372005	---	---	---	---	---	---
227038_at	4.49	0.0139386	MGC26963	hypothetical protein MGC26963	537144	6629 // lipid metabolism // inferred from electronic annotation /// 6665 // sphingolipid metabolism // inferred from electronic annotation /// 6686 // sphingomyelin biosynthesis // inferred from direct assay	16301 // kinase activity // inferred from electronic annotation /// 16740 // transferase activity // inferred from electronic annotation /// 47493 // ceramide cholinephosphotransferase activity // inferred from direct assay	---
225798_at	4.49	0.0239968	tcag7.981	juxtaposed with another zinc finger gene 1	368944	122 // negative regulation of transcription from RNA polymerase II promoter // inferred from direct assay /// 6350 // transcription // inferred from electronic annotation /// 6355 // regulation of transcription, DNA-dependent // inferred from electronic annotation	3676 // nucleic acid binding // inferred from electronic annotation /// 3714 // transcription corepressor activity // inferred from direct assay /// 8270 // zinc ion binding // inferred from electronic annotation /// 46872 // metal ion binding // inferred from electronic annotation	---
217967_s_at	4.48	0.00765601	C1orf24	chromosome 1 open reading frame 24	518662	---	31072 // heat shock protein binding // inferred from electronic annotation	---
201563_at	4.47	0.00119316	SORD	sorbitol dehydrogenase	878	6060 // sorbitol metabolism // not recorded /// 7601 // visual perception // traceable author statement	3939 // L-iditol 2-dehydrogenase activity // inferred from electronic annotation /// 8270 // zinc ion binding // inferred from electronic annotation /// 16491 // oxidoreductase activity // inferred from electronic annotation /// 46872 // metal ion binding // inferred from electronic annotation	Fructose and mannose metabolism // KEGG
216956_s_at	4.47	0.01228	ITGA2B	integrin, alpha 2b (platelet glycoprotein IIb of IIb/IIIa complex, antigen CD41)	411312	7155 // cell adhesion // traceable author statement /// 7229 // integrin-mediated signaling pathway // inferred from electronic annotation /// 30168 // platelet activation // inferred from sequence or structural similarity /// 7155 // cell adhesion // inferred from electronic annotation /// 7155 // cell adhesion // non-traceable author statement /// 6508 // proteolysis // inferred from electronic…	4872 // receptor activity // inferred from electronic annotation /// 5509 // calcium ion binding // inferred from electronic annotation /// 42802 // identical protein binding // inferred from physical interaction /// 5515 // protein binding // inferred from electronic annotation /// 4182 // carboxypeptidase A activity // inferred from electronic annotation	Integrin-mediated_cell_adhesion_KEGG // GenMAPP
225351_at	4.45	0.00126485	FAM45A	family with sequence similarity 45, member A	434241	---	---	---
222848_at	4.44	0.00399511	CENPK	centromere protein K	529778	---	---	---
201670_s_at	4.4	0.00484262	MARCKS	myristoylated alanine-rich protein kinase C substrate	519909	6928 // cell motility // not recorded	5516 // calmodulin binding // traceable author statement /// 51015 // actin filament binding // traceable author statement /// 3779 // actin binding // inferred from electronic annotation /// 5516 // calmodulin binding // inferred from electronic annotation	---
204256_at	4.33	0.0053717	ELOVL6	ELOVL family member 6, elongation of long chain fatty acids (FEN1/Elo2, SUR4/Elo3-like, yeast)	412939	---	---	---
204624_at	4.25	0.0101768	ATP7B	ATPase, Cu++ transporting, beta polypeptide	492280	6825 // copper ion transport // traceable author statement /// 8152 // metabolism // inferred from electronic annotation /// 30001 // metal ion transport // inferred from electronic annotation /// 6810 // transport // inferred from electronic annotation /// 6811 // ion transport // inferred from electronic annotation /// 6812 // cation transport // inferred from electronic annotation /// 6825 // …	166 // nucleotide binding // inferred from electronic annotation /// 287 // magnesium ion binding // inferred from electronic annotation /// 4008 // copper-exporting ATPase activity // non-traceable author statement /// 4866 // endopeptidase inhibitor activity // inferred from sequence or structural similarity /// 5507 // copper ion binding // inferred from direct assay /// 5524 // ATP binding //…	---
208949_s_at	4.2	0.00403861	LGALS3 /// GALIG	lectin, galactoside-binding, soluble, 3 (galectin 3) /// galectin-3 internal gene	531081	---	5529 // sugar binding // traceable author statement /// 19863 // IgE binding // inferred from electronic annotation /// 5529 // sugar binding // inferred from electronic annotation	---
209879_at	4.15	0.000269788	SELPLG	selectin P ligand	591014	7155 // cell adhesion // traceable author statement /// 7155 // cell adhesion // inferred from electronic annotation	5102 // receptor binding // non-traceable author statement /// 5529 // sugar binding // inferred from electronic annotation /// 8367 // bacterial binding // traceable author statement /// 5515 // protein binding // inferred from electronic annotation	---
205390_s_at	4.09	0.00479798	ANK1	ankyrin 1, erythrocytic /// ankyrin 1, erythrocytic	491558	7165 // signal transduction // inferred from electronic annotation /// 45199 // maintenance of epithelial cell polarity // traceable author statement	5200 // structural constituent of cytoskeleton // traceable author statement /// 8093 // cytoskeletal adaptor activity // traceable author statement /// 19899 // enzyme binding // traceable author statement /// 30507 // spectrin binding // non-traceable author statement /// 5515 // protein binding // inferred from physical interaction /// 5515 // protein binding // inferred from electronic annota…	---
208353_x_at	4.03	0.00322142	ANK1	ankyrin 1, erythrocytic	491558	7165 // signal transduction // inferred from electronic annotation /// 45199 // maintenance of epithelial cell polarity // traceable author statement	5200 // structural constituent of cytoskeleton // traceable author statement /// 8093 // cytoskeletal adaptor activity // traceable author statement /// 19899 // enzyme binding // traceable author statement /// 30507 // spectrin binding // non-traceable author statement /// 5515 // protein binding // inferred from physical interaction /// 5515 // protein binding // inferred from electronic annota…	---
210446_at	4.01	0.00499148	GATA1	GATA binding protein 1 (globin transcription factor 1)	765	6350 // transcription // inferred from electronic annotation /// 6357 // regulation of transcription from RNA polymerase II promoter // traceable author statement /// 7275 // development // traceable author statement /// 6355 // regulation of transcription, DNA-dependent // inferred from electronic annotation	3700 // transcription factor activity // traceable author statement /// 8270 // zinc ion binding // inferred from electronic annotation /// 43565 // sequence-specific DNA binding // inferred from electronic annotation /// 46872 // metal ion binding // inferred from electronic annotation /// 3677 // DNA binding // inferred from electronic annotation /// 3700 // transcription factor activity // inf…	---
204026_s_at	4.01	0.0124344	ZWINT	ZW10 interactor	591363	7049 // cell cycle // non-traceable author statement /// 7051 // spindle organization and biogenesis // non-traceable author statement /// 48015 // phosphoinositide-mediated signaling // non-traceable author statement	5515 // protein binding // inferred from physical interaction	---
205394_at	3.97	0.00483595	CHEK1	CHK1 checkpoint homolog (S. pombe)	24529	77 // DNA damage checkpoint // traceable author statement /// 79 // regulation of cyclin-dependent protein kinase activity // traceable author statement /// 6281 // DNA repair // inferred from electronic annotation /// 6468 // protein amino acid phosphorylation // inferred from electronic annotation /// 7049 // cell cycle // inferred from electronic annotation /// 7131 // meiotic recombination //…	166 // nucleotide binding // inferred from electronic annotation /// 4674 // protein serine/threonine kinase activity // inferred from electronic annotation /// 5524 // ATP binding // inferred from electronic annotation /// 16740 // transferase activity // inferred from electronic annotation /// 4672 // protein kinase activity // inferred from electronic annotation /// 16301 // kinase activity //…	Cell_cycle_KEGG // GenMAPP
207677_s_at	3.96	0.00661278	NCF4	neutrophil cytosolic factor 4, 40kDa /// neutrophil cytosolic factor 4, 40kDa	474781	6118 // electron transport // traceable author statement /// 6955 // immune response // traceable author statement /// 7242 // intracellular signaling cascade // inferred from electronic annotation /// 6118 // electron transport // inferred from electronic annotation	35091 // phosphoinositide binding // inferred from electronic annotation /// 46983 // protein dimerization activity // traceable author statement /// 5515 // protein binding // inferred from electronic annotation	---
210395_x_at	3.96	0.024442	MYL4	myosin, light polypeptide 4, alkali; atrial, embryonic	463300	6941 // striated muscle contraction // non-traceable author statement /// 50 // urea cycle // inferred from electronic annotation /// 6526 // arginine biosynthesis // inferred from electronic annotation /// 8652 // amino acid biosynthesis // inferred from electronic annotation /// 50 // urea cycle // traceable author statement	3774 // motor activity // inferred from electronic annotation /// 5509 // calcium ion binding // inferred from electronic annotation /// 8307 // structural constituent of muscle // non-traceable author statement /// 8307 // structural constituent of muscle // not recorded /// 5515 // protein binding // inferred from physical interaction /// 166 // nucleotide binding // inferred from electronic an…	Smooth_muscle_contraction // GenMAPP /// Striated_muscle_contraction // GenMAPP
226726_at	3.94	0.00127584	MBOAT2	membrane bound O-acyltransferase domain containing 2	467634	---	---	---
212432_at	3.92	0.000578195	GRPEL1	GrpE-like 1, mitochondrial (E. coli)	443723	6457 // protein folding // inferred from electronic annotation /// 30150 // protein import into mitochondrial matrix // non-traceable author statement	774 // adenyl-nucleotide exchange factor activity // inferred from electronic annotation /// 42803 // protein homodimerization activity // inferred from electronic annotation /// 51082 // unfolded protein binding // inferred from direct assay /// 51087 // chaperone binding // inferred from electronic annotation /// 5515 // protein binding // inferred from electronic annotation /// 51082 // unfold…	---
205389_s_at	3.92	0.0139125	ANK1	ankyrin 1, erythrocytic /// ankyrin 1, erythrocytic	491558	7165 // signal transduction // inferred from electronic annotation /// 45199 // maintenance of epithelial cell polarity // traceable author statement	5200 // structural constituent of cytoskeleton // traceable author statement /// 8093 // cytoskeletal adaptor activity // traceable author statement /// 19899 // enzyme binding // traceable author statement /// 30507 // spectrin binding // non-traceable author statement /// 5515 // protein binding // inferred from physical interaction /// 5515 // protein binding // inferred from electronic annota…	---
219615_s_at	3.91	0.00346669	KCNK5	potassium channel, subfamily K, member 5	444448	6811 // ion transport // inferred from electronic annotation /// 6813 // potassium ion transport // traceable author statement /// 7588 // excretion // traceable author statement /// 6810 // transport // inferred from electronic annotation /// 6813 // potassium ion transport // inferred from electronic annotation	5244 // voltage-gated ion channel activity // inferred from electronic annotation /// 5267 // potassium channel activity // traceable author statement /// 30955 // potassium ion binding // inferred from electronic annotation /// 5216 // ion channel activity // inferred from electronic annotation /// 5267 // potassium channel activity // inferred from electronic annotation	---
209191_at	3.87	0.00605156	TUBB6	tubulin, beta 6	193491	7018 // microtubule-based movement // inferred from electronic annotation /// 51258 // protein polymerization // inferred from electronic annotation	166 // nucleotide binding // inferred from electronic annotation /// 3924 // GTPase activity // inferred from electronic annotation /// 5198 // structural molecule activity // inferred from electronic annotation /// 5525 // GTP binding // inferred from electronic annotation	---
218883_s_at	3.85	0.0071981	MLF1IP	MLF1 interacting protein	575032	6350 // transcription // inferred from electronic annotation /// 6355 // regulation of transcription, DNA-dependent // inferred from electronic annotation	---	---
210139_s_at	3.84	0.032208	PMP22	peripheral myelin protein 22	372031	7268 // synaptic transmission // traceable author statement /// 7422 // peripheral nervous system development // traceable author statement /// 7605 // sensory perception of sound // inferred from electronic annotation /// 7638 // mechanosensory behavior // inferred from electronic annotation /// 8285 // negative regulation of cell proliferation // not recorded	---	---
225897_at	3.8	0.00537054	---	Homo sapiens, clone IMAGE:5547644, mRNA	593168	---	---	---
222547_at	3.79	0.00427677	MAP4K4	mitogen-activated protein kinase kinase kinase kinase 4	431550	6468 // protein amino acid phosphorylation // inferred from direct assay /// 6468 // protein amino acid phosphorylation // inferred from electronic annotation /// 6950 // response to stress // inferred from direct assay /// 7243 // protein kinase cascade // inferred from direct assay	166 // nucleotide binding // inferred from electronic annotation /// 4674 // protein serine/threonine kinase activity // inferred from direct assay /// 4674 // protein serine/threonine kinase activity // inferred from electronic annotation /// 5083 // small GTPase regulator activity // inferred from electronic annotation /// 5524 // ATP binding // inferred from direct assay /// 5524 // ATP bindin…	---
205147_x_at	3.79	0.00508264	NCF4	neutrophil cytosolic factor 4, 40kDa	474781	6118 // electron transport // traceable author statement /// 6955 // immune response // traceable author statement /// 7242 // intracellular signaling cascade // inferred from electronic annotation /// 6118 // electron transport // inferred from electronic annotation	35091 // phosphoinositide binding // inferred from electronic annotation /// 46983 // protein dimerization activity // traceable author statement /// 5515 // protein binding // inferred from electronic annotation	---
1559067_a_at	3.77	0.00389663	---	Transcribed locus	595538	---	---	---
212473_s_at	3.77	0.0180958	MICAL2	microtubule associated monoxygenase, calponin and LIM domain containing 2	501928	6118 // electron transport // inferred from electronic annotation /// 8152 // metabolism // inferred from electronic annotation /// 6725 // aromatic compound metabolism // inferred from electronic annotation	8270 // zinc ion binding // inferred from electronic annotation /// 16491 // oxidoreductase activity // inferred from electronic annotation /// 46872 // metal ion binding // inferred from electronic annotation /// 4497 // monooxygenase activity // inferred from electronic annotation	---
228802_at	3.77	0.0236421	RBPMS2	RNA binding protein with multiple splicing 2	436518	---	166 // nucleotide binding // inferred from electronic annotation /// 3676 // nucleic acid binding // inferred from electronic annotation /// 3723 // RNA binding // inferred from electronic annotation	---
203680_at	3.73	0.00793735	PRKAR2B	protein kinase, cAMP-dependent, regulatory, type II, beta	433068	6468 // protein amino acid phosphorylation // inferred from electronic annotation /// 7165 // signal transduction // inferred from electronic annotation /// 7242 // intracellular signaling cascade // traceable author statement	166 // nucleotide binding // inferred from electronic annotation /// 8603 // cAMP-dependent protein kinase regulator activity // inferred from electronic annotation /// 8603 // cAMP-dependent protein kinase regulator activity // traceable author statement /// 16301 // kinase activity // inferred from electronic annotation /// 30552 // cAMP binding // inferred from electronic annotation	G_Protein_Signaling // GenMAPP /// Calcium_regulation_in_cardiac_cells // GenMAPP /// Smooth_muscle_contraction // GenMAPP
204868_at	3.72	0.00197346	ICT1	immature colon carcinoma transcript 1	407955	6415 // translational termination // inferred from electronic annotation	3747 // translation release factor activity // inferred from electronic annotation	---
225834_at	3.72	0.00681876	LOC652689 /// FAM72A /// LOC653594 /// LOC653820	hypothetical protein LOC652689 /// family with sequence similarity 72, member A /// similar to family with sequence similarity 72, member A /// similar to family with sequence similarity 72, member A	599880	---	---	---
203764_at	3.71	0.0261042	DLG7	discs, large homolog 7 (Drosophila)	77695	87 // M phase of mitotic cell cycle // inferred from direct assay /// 87 // M phase of mitotic cell cycle // inferred from sequence or structural similarity /// 7049 // cell cycle // inferred from electronic annotation /// 7079 // mitotic chromosome movement towards spindle pole // inferred from sequence or structural similarity /// 7079 // mitotic chromosome movement towards spindle pole // non-…	4721 // phosphoprotein phosphatase activity // inferred from direct assay /// 4721 // phosphoprotein phosphatase activity // inferred from sequence or structural similarity /// 5515 // protein binding // inferred from physical interaction	---
226446_at	3.71	0.0482401	HES6	hairy and enhancer of split 6 (Drosophila)	42949	6355 // regulation of transcription, DNA-dependent // non-traceable author statement /// 30154 // cell differentiation // inferred from electronic annotation /// 6350 // transcription // inferred from electronic annotation /// 6355 // regulation of transcription, DNA-dependent // inferred from electronic annotation /// 7275 // development // inferred from electronic annotation /// 45449 // regula…	3700 // transcription factor activity // traceable author statement /// 3712 // transcription cofactor activity // inferred from sequence or structural similarity /// 3677 // DNA binding // inferred from electronic annotation /// 30528 // transcription regulator activity // inferred from electronic annotation	---
206067_s_at	3.7	0.0286919	WT1	Wilms tumor 1	591980	6350 // transcription // inferred from electronic annotation /// 6355 // regulation of transcription, DNA-dependent // inferred from electronic annotation /// 6355 // regulation of transcription, DNA-dependent // non-traceable author statement /// 7049 // cell cycle // inferred from electronic annotation /// 45786 // negative regulation of progression through cell cycle // inferred from electroni…	3676 // nucleic acid binding // inferred from electronic annotation /// 3700 // transcription factor activity // inferred from electronic annotation /// 3700 // transcription factor activity // non-traceable author statement /// 8270 // zinc ion binding // inferred from electronic annotation /// 46872 // metal ion binding // inferred from electronic annotation /// 3677 // DNA binding // inferred …	---
223223_at	3.69	0.00442109	ARV1	ARV1 homolog (S. cerevisiae)	275736	6629 // lipid metabolism // inferred from electronic annotation /// 6665 // sphingolipid metabolism // inferred from electronic annotation	---	---
204141_at	3.69	0.0210094	TUBB2A	tubulin, beta 2A	---	7018 // microtubule-based movement // inferred from electronic annotation /// 51258 // protein polymerization // inferred from electronic annotation	166 // nucleotide binding // inferred from electronic annotation /// 3924 // GTPase activity // inferred from electronic annotation /// 5198 // structural molecule activity // inferred from electronic annotation /// 5200 // structural constituent of cytoskeleton // not recorded /// 5525 // GTP binding // inferred from electronic annotation	---
220310_at	3.68	0.0107961	TUBAL3	tubulin, alpha-like 3	163079	7018 // microtubule-based movement // inferred from electronic annotation /// 51258 // protein polymerization // inferred from electronic annotation	166 // nucleotide binding // inferred from electronic annotation /// 3924 // GTPase activity // inferred from electronic annotation /// 5198 // structural molecule activity // inferred from electronic annotation /// 5525 // GTP binding // inferred from electronic annotation	---
202666_s_at	3.66	0.0116969	ACTL6A	actin-like 6A	435326	1558 // regulation of cell growth // inferred from electronic annotation /// 6338 // chromatin remodeling // traceable author statement /// 6350 // transcription // inferred from electronic annotation /// 6355 // regulation of transcription, DNA-dependent // inferred from electronic annotation /// 7165 // signal transduction // traceable author statement /// 9613 // response to pest, pathogen or …	3682 // chromatin binding // traceable author statement /// 5200 // structural constituent of cytoskeleton // inferred from electronic annotation /// 5515 // protein binding // inferred from electronic annotation /// 5524 // ATP binding // inferred from electronic annotation	---
218729_at	3.65	0.00759883	LXN	latexin	478067	---	4857 // enzyme inhibitor activity // inferred from electronic annotation /// 8191 // metalloendopeptidase inhibitor activity // inferred from electronic annotation	---
225342_at	3.64	0.0225605	AK3L1	adenylate kinase 3-like 1	592601	6139 // nucleobase, nucleoside, nucleotide and nucleic acid metabolism // inferred from electronic annotation	166 // nucleotide binding // inferred from electronic annotation /// 4017 // adenylate kinase activity // inferred from electronic annotation /// 5524 // ATP binding // inferred from electronic annotation /// 5525 // GTP binding // inferred from electronic annotation /// 16301 // kinase activity // inferred from electronic annotation /// 16740 // transferase activity // inferred from electronic a…	Pyrimidine metabolism // KEGG
212989_at	3.64	0.0393616	TMEM23	transmembrane protein 23	386215	6629 // lipid metabolism // inferred from electronic annotation /// 6665 // sphingolipid metabolism // inferred from electronic annotation /// 6686 // sphingomyelin biosynthesis // inferred from direct assay	16301 // kinase activity // inferred from electronic annotation /// 16740 // transferase activity // inferred from electronic annotation /// 47493 // ceramide cholinephosphotransferase activity // inferred from direct assay	---
209122_at	3.61	0.00119045	ADFP	adipose differentiation-related protein	3416	---	---	---
217023_x_at	3.61	0.042101	TPSAB1	tryptase alpha/beta 1	405479	6508 // proteolysis // inferred from electronic annotation /// 6952 // defense response // traceable author statement /// 6508 // proteolysis // non-traceable author statement	4252 // serine-type endopeptidase activity // inferred from electronic annotation /// 8233 // peptidase activity // inferred from electronic annotation /// 30019 // tryptase activity // inferred from electronic annotation /// 30019 // tryptase activity // non-traceable author statement /// 16787 // hydrolase activity // inferred from electronic annotation /// 8236 // serine-type peptidase activit…	---
239142_at	3.6	0.033396	LOC317671	LOC317671	399758	6118 // electron transport // inferred from electronic annotation	16491 // oxidoreductase activity // inferred from electronic annotation	---
222608_s_at	3.56	0.0146387	ANLN	anillin, actin binding protein	62180	910 // cytokinesis // inferred from direct assay /// 7049 // cell cycle // inferred from electronic annotation /// 7067 // mitosis // inferred from electronic annotation /// 51301 // cell division // inferred from electronic annotation	3779 // actin binding // inferred from direct assay /// 3779 // actin binding // inferred from electronic annotation	---
200872_at	3.56	0.0214131	S100A10	S100 calcium binding protein A10 (annexin II ligand, calpactin I, light polypeptide (p11))	143873	---	5509 // calcium ion binding // inferred from electronic annotation	---
226853_at	3.55	0.0148509	BMP2K	BMP2 inducible kinase	146551	6468 // protein amino acid phosphorylation // inferred from electronic annotation	166 // nucleotide binding // inferred from electronic annotation /// 4674 // protein serine/threonine kinase activity // inferred from electronic annotation /// 5524 // ATP binding // inferred from electronic annotation /// 16740 // transferase activity // inferred from electronic annotation /// 4672 // protein kinase activity // inferred from electronic annotation /// 16301 // kinase activity //…	---
205393_s_at	3.52	0.0124344	CHEK1	CHK1 checkpoint homolog (S. pombe)	24529	77 // DNA damage checkpoint // traceable author statement /// 79 // regulation of cyclin-dependent protein kinase activity // traceable author statement /// 6281 // DNA repair // inferred from electronic annotation /// 6468 // protein amino acid phosphorylation // inferred from electronic annotation /// 7049 // cell cycle // inferred from electronic annotation /// 7131 // meiotic recombination //…	166 // nucleotide binding // inferred from electronic annotation /// 4674 // protein serine/threonine kinase activity // inferred from electronic annotation /// 5524 // ATP binding // inferred from electronic annotation /// 16740 // transferase activity // inferred from electronic annotation /// 4672 // protein kinase activity // inferred from electronic annotation /// 16301 // kinase activity //…	Cell_cycle_KEGG // GenMAPP
212378_at	3.5	0.00126485	GART	phosphoribosylglycinamide formyltransferase, phosphoribosylglycinamide synthetase, phosphoribosylaminoimidazole synthetase	473648	6164 // purine nucleotide biosynthesis // inferred from electronic annotation /// 6189 // 'de novo' IMP biosynthesis // inferred from electronic annotation /// 9058 // biosynthesis // inferred from electronic annotation /// 9113 // purine base biosynthesis // inferred from electronic annotation	166 // nucleotide binding // inferred from electronic annotation /// 3824 // catalytic activity // inferred from electronic annotation /// 4637 // phosphoribosylamine-glycine ligase activity // inferred from electronic annotation /// 4641 // phosphoribosylformylglycinamidine cyclo-ligase activity // inferred from electronic annotation /// 4644 // phosphoribosylglycinamide formyltransferase activi…	Purine metabolism // KEGG /// Purine metabolism // KEGG /// One carbon pool by folate // KEGG /// Purine metabolism // KEGG
206937_at	3.5	0.0342015	SPTA1	spectrin, alpha, erythrocytic 1 (elliptocytosis 2)	119825	7015 // actin filament organization // traceable author statement /// 8360 // regulation of cell shape // inferred from electronic annotation /// 51016 // barbed-end actin filament capping // inferred from electronic annotation	5200 // structural constituent of cytoskeleton // traceable author statement /// 5509 // calcium ion binding // inferred from electronic annotation /// 5515 // protein binding // inferred from physical interaction /// 51015 // actin filament binding // traceable author statement /// 3779 // actin binding // inferred from electronic annotation	---
206102_at	3.49	0.0114932	GINS1	GINS complex subunit 1 (Psf1 homolog)	631508	6260 // DNA replication // inferred from electronic annotation	---	---
216054_x_at	3.49	0.0252451	MYL4	myosin, light polypeptide 4, alkali; atrial, embryonic	463300	6941 // striated muscle contraction // non-traceable author statement	3774 // motor activity // inferred from electronic annotation /// 5509 // calcium ion binding // inferred from electronic annotation /// 8307 // structural constituent of muscle // non-traceable author statement /// 8307 // structural constituent of muscle // not recorded	Smooth_muscle_contraction // GenMAPP /// Striated_muscle_contraction // GenMAPP
210868_s_at	3.48	0.0209012	ELOVL6	ELOVL family member 6, elongation of long chain fatty acids (FEN1/Elo2, SUR4/Elo3-like, yeast)	412939	---	---	---
218894_s_at	3.46	0.00195169	FLJ10292	mago-nashi homolog	104650	398 // nuclear mRNA splicing, via spliceosome // inferred from electronic annotation /// 6406 // mRNA export from nucleus // inferred from electronic annotation /// 6810 // transport // inferred from electronic annotation /// 6397 // mRNA processing // inferred from electronic annotation	3723 // RNA binding // inferred from electronic annotation	---
212256_at	3.46	0.00504018	GALNT10	UDP-N-acetyl-alpha-D-galactosamine:polypeptide N-acetylgalactosaminyltransferase 10 (GalNAc-T10)	432818	---	4653 // polypeptide N-acetylgalactosaminyltransferase activity // inferred from electronic annotation /// 5509 // calcium ion binding // inferred from electronic annotation /// 5529 // sugar binding // inferred from electronic annotation /// 16757 // transferase activity, transferring glycosyl groups // inferred from electronic annotation /// 30145 // manganese ion binding // inferred from electr…	O-Glycan biosynthesis // KEGG /// Glycan structures - biosynthesis 1 // KEGG
214835_s_at	3.46	0.031692	SUCLG2	succinate-CoA ligase, GDP-forming, beta subunit	186512	6099 // tricarboxylic acid cycle // inferred from electronic annotation /// 6104 // succinyl-CoA metabolism // non-traceable author statement /// 8152 // metabolism // inferred from electronic annotation	3824 // catalytic activity // inferred from electronic annotation /// 4776 // succinate-CoA ligase (GDP-forming) activity // non-traceable author statement /// 5524 // ATP binding // inferred from electronic annotation /// 16874 // ligase activity // inferred from electronic annotation /// 4776 // succinate-CoA ligase (GDP-forming) activity // inferred from electronic annotation	Krebs-TCA_Cycle // GenMAPP /// Krebs-TCA_Cycle // GenMAPP /// Citrate cycle (TCA cycle) // KEGG /// Propanoate metabolism // KEGG
231835_at	3.4	0.00757558	C1orf93	chromosome 1 open reading frame 93	462033	---	---	---
229812_at	3.39	0.0108956	USP48	ubiquitin specific peptidase 48	467524	6464 // protein modification // inferred from electronic annotation /// 6511 // ubiquitin-dependent protein catabolism // inferred from electronic annotation	4197 // cysteine-type endopeptidase activity // inferred from electronic annotation /// 4221 // ubiquitin thiolesterase activity // inferred from electronic annotation /// 8233 // peptidase activity // inferred from electronic annotation	---
210987_x_at	3.38	0.00865772	TPM1	tropomyosin 1 (alpha)	133892	6928 // cell motility // traceable author statement /// 6937 // regulation of muscle contraction // traceable author statement /// 8016 // regulation of heart contraction // traceable author statement /// 6633 // fatty acid biosynthesis // inferred from electronic annotation	3779 // actin binding // inferred from electronic annotation /// 5200 // structural constituent of cytoskeleton // inferred from electronic annotation /// 8307 // structural constituent of muscle // traceable author statement /// 3743 // translation initiation factor activity // inferred from electronic annotation /// 3824 // catalytic activity // inferred from electronic annotation	Striated_muscle_contraction // GenMAPP /// Striated_muscle_contraction // GenMAPP /// Striated_muscle_contraction // GenMAPP
208146_s_at	3.38	0.0367603	CPVL	carboxypeptidase, vitellogenic-like /// carboxypeptidase, vitellogenic-like	233389	6508 // proteolysis // inferred from electronic annotation	4185 // serine carboxypeptidase activity // inferred from electronic annotation /// 8233 // peptidase activity // inferred from electronic annotation /// 4180 // carboxypeptidase activity // inferred from electronic annotation /// 16787 // hydrolase activity // inferred from electronic annotation	---
209930_s_at	3.35	0.000267266	NFE2	nuclear factor (erythroid-derived 2), 45kDa	75643	6350 // transcription // inferred from electronic annotation /// 6357 // regulation of transcription from RNA polymerase II promoter // traceable author statement /// 7275 // development // traceable author statement /// 7599 // hemostasis // traceable author statement /// 8015 // circulation // traceable author statement /// 6355 // regulation of transcription, DNA-dependent // inferred from ele…	3700 // transcription factor activity // traceable author statement /// 3713 // transcription coactivator activity // traceable author statement /// 43565 // sequence-specific DNA binding // inferred from electronic annotation /// 46983 // protein dimerization activity // inferred from electronic annotation /// 3677 // DNA binding // inferred from electronic annotation /// 3700 // transcription f…	---
212472_at	3.35	0.00805442	MICAL2	microtubule associated monoxygenase, calponin and LIM domain containing 2	501928	6118 // electron transport // inferred from electronic annotation /// 8152 // metabolism // inferred from electronic annotation	8270 // zinc ion binding // inferred from electronic annotation /// 16491 // oxidoreductase activity // inferred from electronic annotation /// 46872 // metal ion binding // inferred from electronic annotation	---
202705_at	3.34	0.00566283	CCNB2	cyclin B2	194698	74 // regulation of progression through cell cycle // inferred from electronic annotation /// 7049 // cell cycle // inferred from electronic annotation /// 7067 // mitosis // inferred from electronic annotation /// 51301 // cell division // inferred from electronic annotation /// 6412 // protein biosynthesis // inferred from electronic annotation /// 6413 // translational initiation // inferred f…	5515 // protein binding // inferred from physical interaction /// 3743 // translation initiation factor activity // inferred from electronic annotation /// 3743 // translation initiation factor activity // traceable author statement	Translation_Factors // GenMAPP /// Cell_cycle_KEGG // GenMAPP /// Cell_cycle_KEGG // GenMAPP
204781_s_at	3.34	0.0166434	FAS	Fas (TNF receptor superfamily, member 6)	244139	6461 // protein complex assembly // traceable author statement /// 6915 // apoptosis // inferred from electronic annotation /// 6916 // anti-apoptosis // traceable author statement /// 6917 // induction of apoptosis // traceable author statement /// 6955 // immune response // inferred from electronic annotation /// 7165 // signal transduction // inferred from electronic annotation /// 7165 // sig…	4888 // transmembrane receptor activity // inferred from electronic annotation /// 5515 // protein binding // inferred from electronic annotation /// 42802 // identical protein binding // inferred from physical interaction /// 5515 // protein binding // inferred from physical interaction /// 4872 // receptor activity // inferred from electronic annotation /// 4871 // signal transducer activity //…	Apoptosis // GenMAPP /// Apoptosis_GenMAPP // GenMAPP /// Apoptosis_KEGG // GenMAPP
201292_at	3.34	0.0334354	TOP2A	topoisomerase (DNA) II alpha 170kDa	156346	6260 // DNA replication // non-traceable author statement /// 6265 // DNA topological change // inferred from electronic annotation /// 6268 // DNA unwinding during replication // inferred from electronic annotation /// 6281 // DNA repair // non-traceable author statement /// 48015 // phosphoinositide-mediated signaling // non-traceable author statement /// 6259 // DNA metabolism // inferred from…	166 // nucleotide binding // inferred from electronic annotation /// 3918 // DNA topoisomerase (ATP-hydrolyzing) activity // traceable author statement /// 5524 // ATP binding // inferred from electronic annotation /// 3677 // DNA binding // inferred from electronic annotation /// 3916 // DNA topoisomerase activity // inferred from electronic annotation /// 3918 // DNA topoisomerase (ATP-hydrolyz…	---
221521_s_at	3.33	0.0314851	GINS2	GINS complex subunit 2 (Psf2 homolog)	433180	6260 // DNA replication // inferred from electronic annotation	---	---
210088_x_at	3.33	0.035688	MYL4	myosin, light polypeptide 4, alkali; atrial, embryonic	463300	6941 // striated muscle contraction // non-traceable author statement /// 50 // urea cycle // inferred from electronic annotation /// 6526 // arginine biosynthesis // inferred from electronic annotation /// 8652 // amino acid biosynthesis // inferred from electronic annotation /// 50 // urea cycle // traceable author statement	3774 // motor activity // inferred from electronic annotation /// 5509 // calcium ion binding // inferred from electronic annotation /// 8307 // structural constituent of muscle // non-traceable author statement /// 8307 // structural constituent of muscle // not recorded /// 5515 // protein binding // inferred from physical interaction /// 166 // nucleotide binding // inferred from electronic an…	Smooth_muscle_contraction // GenMAPP /// Striated_muscle_contraction // GenMAPP
225171_at	3.3	0.0075526	ARHGAP18	Rho GTPase activating protein 18	486458	7165 // signal transduction // inferred from electronic annotation	5096 // GTPase activator activity // inferred from electronic annotation /// 5515 // protein binding // inferred from physical interaction	---
210580_x_at	3.29	0.000421512	SULT1A3 /// SULT1A4	sulfotransferase family, cytosolic, 1A, phenol-preferring, member 3 /// sulfotransferase family, cytosolic, 1A, phenol-preferring, member 4	460587	6584 // catecholamine metabolism // inferred from electronic annotation /// 6629 // lipid metabolism // inferred from electronic annotation /// 7268 // synaptic transmission // not recorded /// 8202 // steroid metabolism // inferred from electronic annotation /// 6281 // DNA repair // inferred from electronic annotation	4062 // aryl sulfotransferase activity // traceable author statement /// 16740 // transferase activity // inferred from electronic annotation /// 4062 // aryl sulfotransferase activity // inferred from electronic annotation /// 8146 // sulfotransferase activity // inferred from electronic annotation /// 4518 // nuclease activity // inferred from electronic annotation	Sulfur metabolism // KEGG
203132_at	3.29	0.00932414	RB1	retinoblastoma 1 (including osteosarcoma)	408528	75 // cell cycle checkpoint // traceable author statement /// 122 // negative regulation of transcription from RNA polymerase II promoter // traceable author statement /// 279 // M phase // non-traceable author statement /// 6350 // transcription // inferred from electronic annotation /// 6355 // regulation of transcription, DNA-dependent // non-traceable author statement /// 6469 // negative reg…	3700 // transcription factor activity // traceable author statement /// 3713 // transcription coactivator activity // non-traceable author statement /// 5515 // protein binding // inferred from physical interaction /// 19900 // kinase binding // inferred from direct assay /// 50681 // androgen receptor binding // non-traceable author statement /// 3677 // DNA binding // inferred from electronic a…	Cell_cycle_KEGG // GenMAPP /// G1_to_S_cell_cycle_Reactome // GenMAPP /// Cell_cycle_KEGG // GenMAPP /// G1_to_S_cell_cycle_Reactome // GenMAPP
205391_x_at	3.29	0.0139455	ANK1	ankyrin 1, erythrocytic /// ankyrin 1, erythrocytic	491558	7165 // signal transduction // inferred from electronic annotation /// 45199 // maintenance of epithelial cell polarity // traceable author statement	5200 // structural constituent of cytoskeleton // traceable author statement /// 8093 // cytoskeletal adaptor activity // traceable author statement /// 19899 // enzyme binding // traceable author statement /// 30507 // spectrin binding // non-traceable author statement /// 5515 // protein binding // inferred from physical interaction /// 5515 // protein binding // inferred from electronic annota…	---
225762_x_at	3.29	0.0365654	LOC284801	hypothetical protein LOC284801	370699	---	---	---
205262_at	3.28	0.00280241	KCNH2	potassium voltage-gated channel, subfamily H (eag-related), member 2	---	160 // two-component signal transduction system (phosphorelay) // inferred from electronic annotation /// 6355 // regulation of transcription, DNA-dependent // inferred from electronic annotation /// 6811 // ion transport // inferred from electronic annotation /// 6813 // potassium ion transport // traceable author statement /// 6936 // muscle contraction // traceable author statement /// 7605 //…	155 // two-component sensor activity // inferred from electronic annotation /// 5251 // delayed rectifier potassium channel activity // traceable author statement /// 30955 // potassium ion binding // inferred from electronic annotation /// 4871 // signal transducer activity // inferred from electronic annotation /// 5216 // ion channel activity // inferred from electronic annotation /// 5244 // …	---
209509_s_at	3.28	0.00848282	DPAGT1	dolichyl-phosphate (UDP-N-acetylglucosamine) N-acetylglucosaminephosphotransferase 1 (GlcNAc-1-P transferase)	524081	6629 // lipid metabolism // inferred from electronic annotation	3975 // UDP-N-acetylglucosamine-dolichyl-phosphate N-acetylglucosaminephosphotransferase activity // traceable author statement /// 16757 // transferase activity, transferring glycosyl groups // inferred from electronic annotation /// 3824 // catalytic activity // inferred from electronic annotation /// 3975 // UDP-N-acetylglucosamine-dolichyl-phosphate N-acetylglucosaminephosphotransferase activ…	N-Glycan biosynthesis // KEGG /// Glycan structures - biosynthesis 1 // KEGG
203116_s_at	3.28	0.00929909	FECH	ferrochelatase (protoporphyria)	465221	6091 // generation of precursor metabolites and energy // traceable author statement /// 6783 // heme biosynthesis // inferred from electronic annotation /// 6783 // heme biosynthesis // traceable author statement /// 9416 // response to light stimulus // traceable author statement /// 6779 // porphyrin biosynthesis // inferred from electronic annotation	4325 // ferrochelatase activity // inferred from electronic annotation /// 4325 // ferrochelatase activity // traceable author statement /// 8198 // ferrous iron binding // traceable author statement /// 46872 // metal ion binding // inferred from electronic annotation /// 51537 // 2 iron, 2 sulfur cluster binding // inferred from electronic annotation /// 5506 // iron ion binding // inferred fro…	Heme_Biosynthesis // GenMAPP /// Heme_Biosynthesis // GenMAPP /// Porphyrin and chlorophyll metabolism // KEGG
203967_at	3.28	0.0332786	CDC6	CDC6 cell division cycle 6 homolog (S. cerevisiae)	405958	76 // DNA replication checkpoint // traceable author statement /// 79 // regulation of cyclin-dependent protein kinase activity // traceable author statement /// 6260 // DNA replication // inferred from electronic annotation /// 7049 // cell cycle // inferred from electronic annotation /// 7067 // mitosis // inferred from electronic annotation /// 7089 // traversing start control point of mitotic…	166 // nucleotide binding // traceable author statement /// 5515 // protein binding // inferred from physical interaction /// 5524 // ATP binding // inferred from electronic annotation /// 17111 // nucleoside-triphosphatase activity // inferred from electronic annotation /// 166 // nucleotide binding // inferred from electronic annotation	Cell_cycle_KEGG // GenMAPP /// DNA_replication_Reactome // GenMAPP
212434_at	3.26	0.00221049	GRPEL1	GrpE-like 1, mitochondrial (E. coli)	443723	6457 // protein folding // inferred from electronic annotation /// 30150 // protein import into mitochondrial matrix // non-traceable author statement	774 // adenyl-nucleotide exchange factor activity // inferred from electronic annotation /// 42803 // protein homodimerization activity // inferred from electronic annotation /// 51082 // unfolded protein binding // inferred from direct assay /// 51087 // chaperone binding // inferred from electronic annotation /// 5515 // protein binding // inferred from electronic annotation /// 51082 // unfold…	---
223087_at	3.26	0.00221398	ECHDC1	enoyl Coenzyme A hydratase domain containing 1	486410	8152 // metabolism // inferred from electronic annotation	3824 // catalytic activity // inferred from electronic annotation	---
206693_at	3.26	0.0299499	IL7	interleukin 7	591873	6955 // immune response // inferred from electronic annotation /// 6959 // humoral immune response // traceable author statement /// 7267 // cell-cell signaling // traceable author statement /// 8284 // positive regulation of cell proliferation // traceable author statement /// 9887 // organ morphogenesis // traceable author statement /// 30890 // positive regulation of B cell proliferation // in…	5139 // interleukin-7 receptor binding // inferred from electronic annotation /// 5139 // interleukin-7 receptor binding // traceable author statement /// 5515 // protein binding // inferred from physical interaction /// 8083 // growth factor activity // inferred from sequence or structural similarity /// 5125 // cytokine activity // inferred from electronic annotation /// 5126 // hematopoietin/i…	---
204146_at	3.25	0.0295899	RAD51AP1	RAD51 associated protein 1	591046	724 // double-strand break repair via homologous recombination // non-traceable author statement /// 6281 // DNA repair // non-traceable author statement /// 6281 // DNA repair // inferred from electronic annotation /// 6974 // response to DNA damage stimulus // inferred from electronic annotation	3677 // DNA binding // inferred from electronic annotation /// 3690 // double-stranded DNA binding // inferred from direct assay /// 3697 // single-stranded DNA binding // inferred from direct assay /// 3723 // RNA binding // inferred from direct assay /// 5515 // protein binding // inferred from physical interaction /// 3723 // RNA binding // inferred from electronic annotation	---
219032_x_at	3.24	0.00396742	OPN3	opsin 3 (encephalopsin, panopsin)	---	7165 // signal transduction // inferred from electronic annotation /// 7186 // G-protein coupled receptor protein signaling pathway // inferred from electronic annotation /// 7186 // G-protein coupled receptor protein signaling pathway // traceable author statement /// 7601 // visual perception // inferred from electronic annotation /// 7602 // phototransduction // non-traceable author statement …	1584 // rhodopsin-like receptor activity // inferred from electronic annotation /// 4872 // receptor activity // inferred from electronic annotation /// 8020 // G-protein coupled photoreceptor activity // non-traceable author statement /// 4871 // signal transducer activity // inferred from electronic annotation /// 4930 // G-protein coupled receptor activity // inferred from electronic annotatio…	GPCRDB_Class_A_Rhodopsin-like // GenMAPP
219785_s_at	3.24	0.0453877	FBXO31	F-box protein 31	567582	6512 // ubiquitin cycle // inferred from electronic annotation	---	---
210052_s_at	3.22	0.00164362	TPX2	TPX2, microtubule-associated, homolog (Xenopus laevis)	244580	7067 // mitosis // traceable author statement /// 8283 // cell proliferation // traceable author statement	5524 // ATP binding // traceable author statement /// 5525 // GTP binding // traceable author statement	---
218653_at	3.22	0.00352739	SLC25A15	solute carrier family 25 (mitochondrial carrier; ornithine transporter) member 15	631772	50 // urea cycle // traceable author statement /// 66 // mitochondrial ornithine transport // traceable author statement /// 6520 // amino acid metabolism // traceable author statement /// 6810 // transport // inferred from electronic annotation	64 // L-ornithine transporter activity // traceable author statement /// 5215 // transporter activity // inferred from electronic annotation /// 5488 // binding // inferred from electronic annotation	---
227266_s_at	3.22	0.039813	FYB	FYN binding protein (FYB-120/130)	370503	6468 // protein amino acid phosphorylation // traceable author statement /// 6607 // NLS-bearing substrate import into nucleus // traceable author statement /// 6955 // immune response // traceable author statement /// 7165 // signal transduction // traceable author statement /// 7243 // protein kinase cascade // traceable author statement	5102 // receptor binding // traceable author statement /// 5515 // protein binding // traceable author statement	---
215030_at	3.21	0.00164753	GRSF1	G-rich RNA sequence binding factor 1	634071	6378 // mRNA polyadenylylation // traceable author statement	166 // nucleotide binding // inferred from electronic annotation /// 3723 // RNA binding // inferred from electronic annotation /// 3729 // mRNA binding // traceable author statement	---
208873_s_at	3.21	0.00304215	REEP5	receptor accessory protein 5	429608	9401 // phosphoenolpyruvate-dependent sugar phosphotransferase system // inferred from electronic annotation	5351 // sugar porter activity // inferred from electronic annotation	---
222077_s_at	3.21	0.00696409	RACGAP1	Rac GTPase activating protein 1	505469	910 // cytokinesis // inferred from direct assay /// 915 // cytokinesis, contractile ring formation // inferred from mutant phenotype /// 6118 // electron transport // inferred from electronic annotation /// 7049 // cell cycle // inferred from electronic annotation /// 7108 // cytokinesis, initiation of separation // inferred from mutant phenotype /// 7165 // signal transduction // inferred from …	5096 // GTPase activator activity // inferred from direct assay /// 5506 // iron ion binding // inferred from electronic annotation /// 5515 // protein binding // inferred from physical interaction /// 8270 // zinc ion binding // inferred from electronic annotation /// 9055 // electron carrier activity // inferred from electronic annotation /// 19992 // diacylglycerol binding // inferred from ele…	S1P_Signaling // GenMAPP /// S1P_Signaling // GenMAPP
200615_s_at	3.21	0.00817605	AP2B1	adaptor-related protein complex 2, beta 1 subunit	514819	6461 // protein complex assembly // inferred from electronic annotation /// 6886 // intracellular protein transport // inferred from electronic annotation	5515 // protein binding // inferred from physical interaction /// 5488 // binding // inferred from electronic annotation	---
205909_at	3.21	0.027581	POLE2	polymerase (DNA directed), epsilon 2 (p59 subunit)	162777	6260 // DNA replication // traceable author statement /// 6281 // DNA repair // traceable author statement /// 6260 // DNA replication // inferred from electronic annotation	3677 // DNA binding // inferred from electronic annotation /// 3893 // epsilon DNA polymerase activity // traceable author statement /// 16740 // transferase activity // inferred from electronic annotation /// 3887 // DNA-directed DNA polymerase activity // inferred from electronic annotation /// 16779 // nucleotidyltransferase activity // inferred from electronic annotation	DNA_replication_Reactome // GenMAPP /// DNA_replication_Reactome // GenMAPP /// G1_to_S_cell_cycle_Reactome // GenMAPP /// G1_to_S_cell_cycle_Reactome // GenMAPP
213599_at	3.2	0.00408301	OIP5	Opa interacting protein 5	567421	7154 // cell communication // non-traceable author statement	5515 // protein binding // traceable author statement /// 5515 // protein binding // inferred from physical interaction	---
221804_s_at	3.19	0.00155355	FAM45B /// FAM45A	family with sequence similarity 45, member B /// family with sequence similarity 45, member A	558514	---	---	---
209268_at	3.19	0.00532647	VPS45A	vacuolar protein sorting 45A (yeast)	443750	6886 // intracellular protein transport // traceable author statement /// 6904 // vesicle docking during exocytosis // inferred from electronic annotation /// 6954 // inflammatory response // traceable author statement /// 16192 // vesicle-mediated transport // inferred from electronic annotation /// 6810 // transport // inferred from electronic annotation /// 15031 // protein transport // inferr…	---	---
213553_x_at	3.18	0.0135714	APOC1	apolipoprotein C-I	---	6629 // lipid metabolism // traceable author statement /// 6869 // lipid transport // inferred from electronic annotation /// 42157 // lipoprotein metabolism // inferred from electronic annotation /// 6810 // transport // inferred from electronic annotation	5319 // lipid transporter activity // inferred from electronic annotation	Statin_Pathway_PharmGKB // GenMAPP
213288_at	3.17	0.00539846	---	Clone 23620 mRNA sequence	593538	---	---	---
215983_s_at	3.17	0.0209541	UBXD6	UBX domain containing 6	153678	7338 // fertilization (sensu Metazoa) // traceable author statement	---	---
1552257_a_at	3.16	0.00177107	TTLL12	tubulin tyrosine ligase-like family, member 12	517670	6464 // protein modification // inferred from electronic annotation	4835 // tubulin-tyrosine ligase activity // inferred from electronic annotation /// 16874 // ligase activity // inferred from electronic annotation	---
218549_s_at	3.16	0.00247929	FAM82B	family with sequence similarity 82, member B	145386	---	5488 // binding // inferred from electronic annotation	---
209662_at	3.16	0.00697104	CETN3	centrin, EF-hand protein, 3 (CDC31 homolog, yeast)	591767	7067 // mitosis // inferred from electronic annotation /// 7098 // centrosome cycle // traceable author statement /// 51301 // cell division // inferred from electronic annotation /// 7049 // cell cycle // inferred from electronic annotation	5509 // calcium ion binding // inferred from electronic annotation	---
212459_x_at	3.16	0.034047	SUCLG2	succinate-CoA ligase, GDP-forming, beta subunit	186512	6099 // tricarboxylic acid cycle // inferred from electronic annotation /// 6104 // succinyl-CoA metabolism // non-traceable author statement /// 8152 // metabolism // inferred from electronic annotation	3824 // catalytic activity // inferred from electronic annotation /// 4776 // succinate-CoA ligase (GDP-forming) activity // non-traceable author statement /// 5524 // ATP binding // inferred from electronic annotation /// 16874 // ligase activity // inferred from electronic annotation /// 4776 // succinate-CoA ligase (GDP-forming) activity // inferred from electronic annotation	Krebs-TCA_Cycle // GenMAPP /// Krebs-TCA_Cycle // GenMAPP /// Citrate cycle (TCA cycle) // KEGG /// Propanoate metabolism // KEGG
226126_at	3.15	0.00616196	MGC16169	hypothetical protein MGC16169	292986	6468 // protein amino acid phosphorylation // inferred from electronic annotation	166 // nucleotide binding // inferred from electronic annotation /// 4672 // protein kinase activity // inferred from electronic annotation /// 5524 // ATP binding // inferred from electronic annotation /// 16740 // transferase activity // inferred from electronic annotation /// 16301 // kinase activity // inferred from electronic annotation	---
200878_at	3.14	0.0257743	EPAS1	endothelial PAS domain protein 1	468410	1525 // angiogenesis // inferred from electronic annotation /// 1666 // response to hypoxia // inferred from direct assay /// 6355 // regulation of transcription, DNA-dependent // inferred from electronic annotation /// 6366 // transcription from RNA polymerase II promoter // traceable author statement /// 7165 // signal transduction // traceable author statement /// 30154 // cell differentiation…	3705 // RNA polymerase II transcription factor activity, enhancer binding // traceable author statement /// 3713 // transcription coactivator activity // traceable author statement /// 4871 // signal transducer activity // inferred from electronic annotation /// 5515 // protein binding // inferred from physical interaction /// 35035 // histone acetyltransferase binding // inferred from physical i…	---
213566_at	3.14	0.0364827	RNASE6	ribonuclease, RNase A family, k6 /// ribonuclease, RNase A family, k6	23262	6401 // RNA catabolism // traceable author statement /// 6952 // defense response // traceable author statement	3676 // nucleic acid binding // inferred from electronic annotation /// 4519 // endonuclease activity // inferred from electronic annotation /// 4522 // pancreatic ribonuclease activity // inferred from electronic annotation /// 4540 // ribonuclease activity // traceable author statement /// 16787 // hydrolase activity // inferred from electronic annotation /// 4518 // nuclease activity // inferr…	---
225687_at	3.13	0.0432098	FAM83D	family with sequence similarity 83, member D	472716	6418 // tRNA aminoacylation for protein translation // inferred from electronic annotation	166 // nucleotide binding // inferred from electronic annotation /// 4812 // aminoacyl-tRNA ligase activity // inferred from electronic annotation /// 5524 // ATP binding // inferred from electronic annotation /// 16874 // ligase activity // inferred from electronic annotation	---
208352_x_at	3.11	0.00434726	ANK1	ankyrin 1, erythrocytic	491558	7165 // signal transduction // inferred from electronic annotation /// 45199 // maintenance of epithelial cell polarity // traceable author statement	5200 // structural constituent of cytoskeleton // traceable author statement /// 8093 // cytoskeletal adaptor activity // traceable author statement /// 19899 // enzyme binding // traceable author statement /// 30507 // spectrin binding // non-traceable author statement /// 5515 // protein binding // inferred from physical interaction /// 5515 // protein binding // inferred from electronic annota…	---
218984_at	3.11	0.00626049	PUS7	pseudouridylate synthase 7 homolog (S. cerevisiae)	520619	8033 // tRNA processing // inferred from electronic annotation	4730 // pseudouridylate synthase activity // inferred from electronic annotation /// 16853 // isomerase activity // inferred from electronic annotation	---
202151_s_at	3.11	0.00689107	UBADC1	ubiquitin associated domain containing 1	9194	---	---	---
215772_x_at	3.11	0.0421821	SUCLG2	succinate-CoA ligase, GDP-forming, beta subunit	186512	6099 // tricarboxylic acid cycle // inferred from electronic annotation /// 6104 // succinyl-CoA metabolism // non-traceable author statement /// 8152 // metabolism // inferred from electronic annotation	3824 // catalytic activity // inferred from electronic annotation /// 4776 // succinate-CoA ligase (GDP-forming) activity // non-traceable author statement /// 5524 // ATP binding // inferred from electronic annotation /// 16874 // ligase activity // inferred from electronic annotation /// 4776 // succinate-CoA ligase (GDP-forming) activity // inferred from electronic annotation	Krebs-TCA_Cycle // GenMAPP /// Krebs-TCA_Cycle // GenMAPP /// Citrate cycle (TCA cycle) // KEGG /// Propanoate metabolism // KEGG
223201_s_at	3.09	0.00204077	TMEM164 /// LOC653522	transmembrane protein 164 /// similar to hypothetical protein FLJ22679	496572	---	---	---
213002_at	3.09	0.0146003	MARCKS	Myristoylated alanine-rich protein kinase C substrate	519909	6928 // cell motility // not recorded	5516 // calmodulin binding // traceable author statement /// 51015 // actin filament binding // traceable author statement /// 3779 // actin binding // inferred from electronic annotation /// 5516 // calmodulin binding // inferred from electronic annotation	---
1555495_a_at	3.07	0.00356764	SDCCAG10	serologically defined colon cancer antigen 10	371372	6457 // protein folding // inferred from electronic annotation	3755 // peptidyl-prolyl cis-trans isomerase activity // inferred from electronic annotation /// 16853 // isomerase activity // inferred from electronic annotation	---
221539_at	3.07	0.00358148	EIF4EBP1	eukaryotic translation initiation factor 4E binding protein 1	411641	6445 // regulation of translation // traceable author statement /// 17148 // negative regulation of protein biosynthesis // inferred from electronic annotation /// 45947 // negative regulation of translational initiation // inferred from electronic annotation /// 6417 // regulation of protein biosynthesis // inferred from electronic annotation /// 6445 // regulation of translation // inferred fro…	5515 // protein binding // inferred from physical interaction /// 8190 // eukaryotic initiation factor 4E binding // inferred from electronic annotation /// 3677 // DNA binding // inferred from electronic annotation /// 3700 // transcription factor activity // inferred from electronic annotation /// 43565 // sequence-specific DNA binding // inferred from electronic annotation /// 46983 // protein…	Translation_Factors // GenMAPP /// Hypertrophy_model // GenMAPP
1556997_a_at	3.06	0.0316038	---	CDNA clone IMAGE:4795984	258228	---	---	---
225944_at	3.05	0.00618475	NLN	neurolysin (metallopeptidase M3 family)	247460	6508 // proteolysis // inferred from electronic annotation	4222 // metalloendopeptidase activity // inferred from electronic annotation /// 8270 // zinc ion binding // inferred from electronic annotation /// 16787 // hydrolase activity // inferred from electronic annotation /// 46872 // metal ion binding // inferred from electronic annotation /// 8237 // metallopeptidase activity // inferred from electronic annotation /// 8233 // peptidase activity // in…	---
201291_s_at	3.05	0.0451162	TOP2A	topoisomerase (DNA) II alpha 170kDa	156346	6260 // DNA replication // non-traceable author statement /// 6265 // DNA topological change // inferred from electronic annotation /// 6268 // DNA unwinding during replication // inferred from electronic annotation /// 6281 // DNA repair // non-traceable author statement /// 48015 // phosphoinositide-mediated signaling // non-traceable author statement /// 6259 // DNA metabolism // inferred from…	166 // nucleotide binding // inferred from electronic annotation /// 3918 // DNA topoisomerase (ATP-hydrolyzing) activity // traceable author statement /// 5524 // ATP binding // inferred from electronic annotation /// 3677 // DNA binding // inferred from electronic annotation /// 3916 // DNA topoisomerase activity // inferred from electronic annotation /// 3918 // DNA topoisomerase (ATP-hydrolyz…	---
222037_at	3.04	0.0197937	MCM4	MCM4 minichromosome maintenance deficient 4 (S. cerevisiae)	460184	6260 // DNA replication // non-traceable author statement /// 6270 // DNA replication initiation // inferred from electronic annotation /// 6350 // transcription // inferred from electronic annotation /// 6355 // regulation of transcription, DNA-dependent // inferred from electronic annotation /// 6260 // DNA replication // inferred from electronic annotation	166 // nucleotide binding // inferred from electronic annotation /// 3677 // DNA binding // inferred from electronic annotation /// 5515 // protein binding // inferred from physical interaction /// 5524 // ATP binding // non-traceable author statement /// 8094 // DNA-dependent ATPase activity // inferred from electronic annotation /// 17111 // nucleoside-triphosphatase activity // inferred from e…	Cell_cycle_KEGG // GenMAPP /// DNA_replication_Reactome // GenMAPP /// G1_to_S_cell_cycle_Reactome // GenMAPP
218976_at	3.03	0.00138382	DNAJC12	DnaJ (Hsp40) homolog, subfamily C, member 12	260720	6457 // protein folding // inferred from electronic annotation	31072 // heat shock protein binding // inferred from electronic annotation /// 51082 // unfolded protein binding // inferred from electronic annotation	---
208816_x_at	3.02	0.00662444	ANXA2P2	annexin A2 pseudogene 2	534301	---	---	---
202330_s_at	3.02	0.0181374	UNG	uracil-DNA glycosylase	191334	5975 // carbohydrate metabolism // inferred from electronic annotation /// 6284 // base-excision repair // traceable author statement /// 6281 // DNA repair // inferred from electronic annotation /// 6284 // base-excision repair // inferred from electronic annotation /// 6974 // response to DNA damage stimulus // inferred from electronic annotation /// 6281 // DNA repair // traceable author state…	4844 // uracil DNA N-glycosylase activity // non-traceable author statement /// 16798 // hydrolase activity, acting on glycosyl bonds // inferred from electronic annotation /// 4844 // uracil DNA N-glycosylase activity // inferred from electronic annotation /// 16787 // hydrolase activity // inferred from electronic annotation /// 4844 // uracil DNA N-glycosylase activity // traceable author stat…	Pyrimidine metabolism // KEGG
201614_s_at	2.99	0.00257656	RUVBL1	RuvB-like 1 (E. coli)	272822	1558 // regulation of cell growth // inferred from electronic annotation /// 6310 // DNA recombination // inferred from electronic annotation /// 6350 // transcription // inferred from electronic annotation /// 6357 // regulation of transcription from RNA polymerase II promoter // traceable author statement /// 7283 // spermatogenesis // traceable author statement /// 16568 // chromatin modificat…	166 // nucleotide binding // inferred from electronic annotation /// 3678 // DNA helicase activity // inferred from direct assay /// 5515 // protein binding // inferred from physical interaction /// 5524 // ATP binding // inferred from electronic annotation /// 16787 // hydrolase activity // inferred from electronic annotation /// 16887 // ATPase activity // inferred from direct assay /// 3678 //…	---
219215_s_at	2.99	0.00416122	SLC39A4	solute carrier family 39 (zinc transporter), member 4	521934	6811 // ion transport // inferred from electronic annotation /// 6829 // zinc ion transport // inferred from electronic annotation /// 30001 // metal ion transport // inferred from electronic annotation /// 6810 // transport // inferred from electronic annotation	8270 // zinc ion binding // inferred from electronic annotation /// 46873 // metal ion transporter activity // inferred from electronic annotation	---
36830_at	2.99	0.0146496	MIPEP	mitochondrial intermediate peptidase	507498	6508 // proteolysis // inferred from electronic annotation /// 6627 // mitochondrial protein processing // traceable author statement	287 // magnesium ion binding // inferred from electronic annotation /// 4243 // mitochondrial intermediate peptidase activity // inferred from electronic annotation /// 5506 // iron ion binding // inferred from electronic annotation /// 5509 // calcium ion binding // inferred from electronic annotation /// 8270 // zinc ion binding // inferred from electronic annotation /// 30145 // manganese ion …	---
235916_at	2.99	0.0496012	YPEL4	yippee-like 4 (Drosophila)	135978	---	---	---
218357_s_at	2.97	0.00150101	TIMM8B	translocase of inner mitochondrial membrane 8 homolog B (yeast)	530373	6457 // protein folding // inferred from electronic annotation /// 7605 // sensory perception of sound // traceable author statement /// 15031 // protein transport // inferred from electronic annotation /// 45039 // protein import into mitochondrial inner membrane // inferred from electronic annotation /// 6605 // protein targeting // inferred from electronic annotation /// 6626 // protein target…	8270 // zinc ion binding // traceable author statement /// 46872 // metal ion binding // inferred from electronic annotation /// 51082 // unfolded protein binding // inferred from electronic annotation /// 8270 // zinc ion binding // inferred from electronic annotation	---
223337_at	2.97	0.0044029	SDCCAG10	serologically defined colon cancer antigen 10	371372	6457 // protein folding // inferred from electronic annotation	3755 // peptidyl-prolyl cis-trans isomerase activity // inferred from electronic annotation /// 16853 // isomerase activity // inferred from electronic annotation	---
202718_at	2.97	0.0314092	IGFBP2	insulin-like growth factor binding protein 2, 36kDa	438102	1558 // regulation of cell growth // inferred from electronic annotation	5520 // insulin-like growth factor binding // inferred from electronic annotation /// 19838 // growth factor binding // inferred from electronic annotation	Smooth_muscle_contraction // GenMAPP
214697_s_at	2.95	0.00126485	ROD1	ROD1 regulator of differentiation 1 (S. pombe)	269988	398 // nuclear mRNA splicing, via spliceosome // inferred from electronic annotation /// 6397 // mRNA processing // inferred from electronic annotation /// 9653 // morphogenesis // traceable author statement	166 // nucleotide binding // inferred from electronic annotation /// 3676 // nucleic acid binding // inferred from electronic annotation /// 3723 // RNA binding // inferred from electronic annotation /// 3723 // RNA binding // traceable author statement	---
221027_s_at	2.94	0.00234976	PLA2G12A	phospholipase A2, group XIIA /// phospholipase A2, group XIIA	---	16042 // lipid catabolism // inferred from electronic annotation /// 6644 // phospholipid metabolism // inferred from electronic annotation	5509 // calcium ion binding // inferred from electronic annotation /// 16787 // hydrolase activity // inferred from electronic annotation /// 47498 // calcium-dependent phospholipase A2 activity // non-traceable author statement /// 4623 // phospholipase A2 activity // inferred from electronic annotation /// 46872 // metal ion binding // inferred from electronic annotation	---
212407_at	2.94	0.0036519	KIAA0859	KIAA0859	494705	---	---	---
216237_s_at	2.94	0.00451392	MCM5	MCM5 minichromosome maintenance deficient 5, cell division cycle 46 (S. cerevisiae)	517582	74 // regulation of progression through cell cycle // traceable author statement /// 6260 // DNA replication // traceable author statement /// 6270 // DNA replication initiation // inferred from electronic annotation /// 6350 // transcription // inferred from electronic annotation /// 6355 // regulation of transcription, DNA-dependent // inferred from electronic annotation /// 6260 // DNA replica…	166 // nucleotide binding // inferred from electronic annotation /// 3677 // DNA binding // inferred from electronic annotation /// 5515 // protein binding // inferred from physical interaction /// 5524 // ATP binding // inferred from electronic annotation /// 8094 // DNA-dependent ATPase activity // inferred from electronic annotation /// 3676 // nucleic acid binding // inferred from electronic …	Cell_cycle_KEGG // GenMAPP /// DNA_replication_Reactome // GenMAPP /// G1_to_S_cell_cycle_Reactome // GenMAPP
203259_s_at	2.94	0.00506535	HDDC2	HD domain containing 2	32826	---	3824 // catalytic activity // inferred from electronic annotation	---
213005_s_at	2.93	0.0206873	ANKRD15	ankyrin repeat domain 15	306764	7049 // cell cycle // inferred from electronic annotation /// 45786 // negative regulation of progression through cell cycle // inferred from electronic annotation	---	---
229431_at	2.93	0.0237885	RFXAP	regulatory factor X-associated protein	24422	6366 // transcription from RNA polymerase II promoter // not recorded	3700 // transcription factor activity // non-traceable author statement /// 3713 // transcription coactivator activity // traceable author statement	---
223461_at	2.92	0.00266953	TBC1D7	TBC1 domain family, member 7	484678	---	5096 // GTPase activator activity // inferred from electronic annotation	---
208970_s_at	2.92	0.00759883	SMAD3 /// UROD	SMAD, mothers against DPP homolog 3 (Drosophila) /// uroporphyrinogen decarboxylase	569432	6350 // transcription // inferred from electronic annotation /// 6355 // regulation of transcription, DNA-dependent // inferred from electronic annotation /// 6366 // transcription from RNA polymerase II promoter // traceable author statement /// 7179 // transforming growth factor beta receptor signaling pathway // traceable author statement /// 6779 // porphyrin biosynthesis // inferred from ele…	3700 // transcription factor activity // traceable author statement /// 5515 // protein binding // inferred from physical interaction /// 4853 // uroporphyrinogen decarboxylase activity // inferred from electronic annotation /// 4853 // uroporphyrinogen decarboxylase activity // traceable author statement /// 16829 // lyase activity // inferred from electronic annotation /// 3700 // transcription…	Heme_Biosynthesis // GenMAPP /// Porphyrin and chlorophyll metabolism // KEGG
204023_at	2.91	0.0235089	RFC4	replication factor C (activator 1) 4, 37kDa	591322	6260 // DNA replication // non-traceable author statement /// 6271 // DNA strand elongation // traceable author statement /// 6281 // DNA repair // non-traceable author statement /// 48015 // phosphoinositide-mediated signaling // non-traceable author statement /// 6260 // DNA replication // inferred from electronic annotation	166 // nucleotide binding // inferred from electronic annotation /// 5515 // protein binding // inferred from physical interaction /// 5524 // ATP binding // inferred from electronic annotation /// 17111 // nucleoside-triphosphatase activity // inferred from electronic annotation	DNA_replication_Reactome // GenMAPP
207087_x_at	2.9	0.0107127	ANK1	ankyrin 1, erythrocytic	491558	7165 // signal transduction // inferred from electronic annotation /// 45199 // maintenance of epithelial cell polarity // traceable author statement	5200 // structural constituent of cytoskeleton // traceable author statement /// 8093 // cytoskeletal adaptor activity // traceable author statement /// 19899 // enzyme binding // traceable author statement /// 30507 // spectrin binding // non-traceable author statement /// 5515 // protein binding // inferred from physical interaction /// 5515 // protein binding // inferred from electronic annota…	---
203115_at	2.9	0.0197705	FECH	ferrochelatase (protoporphyria)	465221	6091 // generation of precursor metabolites and energy // traceable author statement /// 6783 // heme biosynthesis // inferred from electronic annotation /// 6783 // heme biosynthesis // traceable author statement /// 9416 // response to light stimulus // traceable author statement /// 6779 // porphyrin biosynthesis // inferred from electronic annotation	4325 // ferrochelatase activity // inferred from electronic annotation /// 4325 // ferrochelatase activity // traceable author statement /// 8198 // ferrous iron binding // traceable author statement /// 46872 // metal ion binding // inferred from electronic annotation /// 51537 // 2 iron, 2 sulfur cluster binding // inferred from electronic annotation /// 5506 // iron ion binding // inferred fro…	Heme_Biosynthesis // GenMAPP /// Heme_Biosynthesis // GenMAPP /// Porphyrin and chlorophyll metabolism // KEGG
228642_at	2.9	0.0237802	---	Homo sapiens, clone IMAGE:5019307, mRNA	445239	---	---	---
206571_s_at	2.89	0.000496729	MAP4K4	mitogen-activated protein kinase kinase kinase kinase 4	431550	6468 // protein amino acid phosphorylation // inferred from direct assay /// 6468 // protein amino acid phosphorylation // inferred from electronic annotation /// 6950 // response to stress // inferred from direct assay /// 7243 // protein kinase cascade // inferred from direct assay	166 // nucleotide binding // inferred from electronic annotation /// 4674 // protein serine/threonine kinase activity // inferred from direct assay /// 4674 // protein serine/threonine kinase activity // inferred from electronic annotation /// 5083 // small GTPase regulator activity // inferred from electronic annotation /// 5524 // ATP binding // inferred from direct assay /// 5524 // ATP bindin…	---
227139_s_at	2.88	0.0299056	HPS3	Hermansky-Pudlak syndrome 3	591311	---	---	---
221021_s_at	2.87	0.00703348	CTNNBL1	catenin, beta like 1 /// catenin, beta like 1	472667	6915 // apoptosis // inferred from electronic annotation	5488 // binding // inferred from electronic annotation	---
203284_s_at	2.87	0.0071981	HS2ST1	heparan sulfate 2-O-sulfotransferase 1	48823	---	16740 // transferase activity // inferred from electronic annotation	---
218756_s_at	2.87	0.0171638	MGC4172	short-chain dehydrogenase/reductase	462859	8152 // metabolism // inferred from electronic annotation	16491 // oxidoreductase activity // inferred from electronic annotation	---
218051_s_at	2.87	0.0287229	NT5DC2	5'-nucleotidase domain containing 2	84753	---	---	---
235940_at	2.86	0.00544001	C9orf64	chromosome 9 open reading frame 64	208914	---	---	---
218194_at	2.86	0.0139455	REXO2	REX2, RNA exonuclease 2 homolog (S. cerevisiae)	7527	9117 // nucleotide metabolism // traceable author statement /// 6139 // nucleobase, nucleoside, nucleotide and nucleic acid metabolism // inferred from direct assay	8408 // 3'-5' exonuclease activity // inferred from direct assay /// 16787 // hydrolase activity // inferred from electronic annotation /// 30145 // manganese ion binding // inferred from electronic annotation /// 4527 // exonuclease activity // inferred from electronic annotation /// 4518 // nuclease activity // inferred from electronic annotation /// 8408 // 3'-5' exonuclease activity // tracea…	---
218160_at	2.85	0.00149589	NDUFA8	NADH dehydrogenase (ubiquinone) 1 alpha subcomplex, 8, 19kDa	495039	---	3954 // NADH dehydrogenase activity // inferred from electronic annotation /// 8137 // NADH dehydrogenase (ubiquinone) activity // traceable author statement /// 16491 // oxidoreductase activity // inferred from electronic annotation /// 8137 // NADH dehydrogenase (ubiquinone) activity // inferred from electronic annotation	Electron_Transport_Chain // GenMAPP /// Oxidative phosphorylation // KEGG /// Ubiquinone biosynthesis // KEGG /// Oxidative phosphorylation // KEGG
1557051_s_at	2.85	0.00408301	---	Homo sapiens, clone IMAGE:5019307, mRNA	445239	---	---	---
209607_x_at	2.84	0.000397877	SULT1A3 /// SULT1A4 /// LOC648394	sulfotransferase family, cytosolic, 1A, phenol-preferring, member 3 /// sulfotransferase family, cytosolic, 1A, phenol-preferring, member 4 /// similar to sulfotransferase family, cytosolic, 1A, phenol-preferring, member 3	460587	6584 // catecholamine metabolism // inferred from electronic annotation /// 6629 // lipid metabolism // inferred from electronic annotation /// 7268 // synaptic transmission // not recorded /// 8202 // steroid metabolism // inferred from electronic annotation /// 6281 // DNA repair // inferred from electronic annotation	4062 // aryl sulfotransferase activity // traceable author statement /// 16740 // transferase activity // inferred from electronic annotation /// 8146 // sulfotransferase activity // inferred from electronic annotation /// 4062 // aryl sulfotransferase activity // inferred from electronic annotation /// 4518 // nuclease activity // inferred from electronic annotation	Sulfur metabolism // KEGG
205449_at	2.84	0.00201091	SAC3D1	SAC3 domain containing 1	23642	51227 // mitotic spindle assembly // inferred from sequence or structural similarity /// 51298 // centrosome duplication // inferred from sequence or structural similarity	5515 // protein binding // inferred from physical interaction	---
220741_s_at	2.84	0.00326593	PPA2 /// RNF36	pyrophosphatase (inorganic) 2 /// ring finger protein 36	480452	6796 // phosphate metabolism // inferred from electronic annotation	287 // magnesium ion binding // inferred from electronic annotation /// 4427 // inorganic diphosphatase activity // inferred from electronic annotation /// 16787 // hydrolase activity // inferred from electronic annotation /// 5515 // protein binding // inferred from electronic annotation /// 8270 // zinc ion binding // inferred from electronic annotation /// 46872 // metal ion binding // inferre…	Oxidative phosphorylation // KEGG
223266_at	2.84	0.00627123	ALS2CR2	amyotrophic lateral sclerosis 2 (juvenile) chromosome region, candidate 2	591622	6468 // protein amino acid phosphorylation // non-traceable author statement /// 6468 // protein amino acid phosphorylation // inferred from electronic annotation	166 // nucleotide binding // inferred from electronic annotation /// 4672 // protein kinase activity // non-traceable author statement /// 5515 // protein binding // inferred from physical interaction /// 5524 // ATP binding // non-traceable author statement /// 16740 // transferase activity // inferred from electronic annotation /// 4672 // protein kinase activity // inferred from electronic ann…	---
207255_at	2.84	0.0287793	LEPR	leptin receptor	23581	6112 // energy reserve metabolism // traceable author statement /// 7166 // cell surface receptor linked signal transduction // traceable author statement /// 7275 // development // traceable author statement	4896 // hematopoietin/interferon-class (D200-domain) cytokine receptor activity // inferred from electronic annotation /// 4872 // receptor activity // inferred from electronic annotation /// 4888 // transmembrane receptor activity // traceable author statement	---
225743_at	2.83	0.0012618	RPUSD3	RNA pseudouridylate synthase domain containing 3	33719	6396 // RNA processing // inferred from electronic annotation	3723 // RNA binding // inferred from electronic annotation /// 9982 // pseudouridine synthase activity // inferred from electronic annotation	---
223413_s_at	2.83	0.00635423	LYAR	hypothetical protein FLJ20425	425427	---	8270 // zinc ion binding // inferred from electronic annotation /// 46872 // metal ion binding // inferred from electronic annotation	---
208998_at	2.82	0.000578195	UCP2	uncoupling protein 2 (mitochondrial, proton carrier)	80658	6810 // transport // non-traceable author statement /// 6839 // mitochondrial transport // inferred from electronic annotation /// 15992 // proton transport // traceable author statement /// 6810 // transport // inferred from electronic annotation	5215 // transporter activity // inferred from electronic annotation /// 5488 // binding // inferred from electronic annotation	Electron_Transport_Chain // GenMAPP
203276_at	2.82	0.00654129	LMNB1	lamin B1	89497	---	5198 // structural molecule activity // traceable author statement /// 5198 // structural molecule activity // inferred from electronic annotation	---
202503_s_at	2.82	0.0158231	KIAA0101	KIAA0101	81892	6468 // protein amino acid phosphorylation // inferred from electronic annotation /// 16055 // Wnt receptor signaling pathway // inferred from electronic annotation	166 // nucleotide binding // inferred from electronic annotation /// 4672 // protein kinase activity // inferred from electronic annotation /// 4674 // protein serine/threonine kinase activity // inferred from electronic annotation /// 5524 // ATP binding // inferred from electronic annotation /// 16301 // kinase activity // inferred from electronic annotation /// 16740 // transferase activity //…	---
225684_at	2.81	0.00143352	FAM33A	family with sequence similarity 33, member A	463607	---	---	---
227928_at	2.81	0.00322142	C12orf48	chromosome 12 open reading frame 48	330663	---	---	---
204531_s_at	2.81	0.014324	BRCA1	breast cancer 1, early onset	194143	75 // cell cycle checkpoint // non-traceable author statement /// 6281 // DNA repair // inferred from electronic annotation /// 6357 // regulation of transcription from RNA polymerase II promoter // traceable author statement /// 6359 // regulation of transcription from RNA polymerase III promoter // traceable author statement /// 6978 // DNA damage response, signal transduction by p53 class medi…	3677 // DNA binding // inferred from electronic annotation /// 3677 // DNA binding // traceable author statement /// 3713 // transcription coactivator activity // non-traceable author statement /// 4842 // ubiquitin-protein ligase activity // non-traceable author statement /// 5515 // protein binding // inferred from electronic annotation /// 5515 // protein binding // inferred from physical inte…	---
218935_at	2.8	0.00161727	EHD3	EH-domain containing 3	368808	8152 // metabolism // inferred from electronic annotation	166 // nucleotide binding // inferred from electronic annotation /// 3676 // nucleic acid binding // traceable author statement /// 3924 // GTPase activity // inferred from electronic annotation /// 5509 // calcium ion binding // inferred from electronic annotation /// 5524 // ATP binding // inferred from electronic annotation /// 5525 // GTP binding // inferred from electronic annotation /// 164…	---
226456_at	2.79	0.00661278	C16orf75	chromosome 16 open reading frame 75	347524	---	3676 // nucleic acid binding // inferred from electronic annotation	---
201611_s_at	2.79	0.00668523	ICMT	isoprenylcysteine carboxyl methyltransferase	562083	6464 // protein modification // traceable author statement /// 6481 // C-terminal protein amino acid methylation // traceable author statement /// 6612 // protein targeting to membrane // traceable author statement /// 6481 // C-terminal protein amino acid methylation // inferred from electronic annotation	3880 // C-terminal protein carboxyl methyltransferase activity // traceable author statement /// 4671 // protein-S-isoprenylcysteine O-methyltransferase activity // inferred from electronic annotation /// 8168 // methyltransferase activity // inferred from electronic annotation /// 16740 // transferase activity // inferred from electronic annotation	---
208393_s_at	2.79	0.00683546	RAD50	RAD50 homolog (S. cerevisiae)	128904	19 // regulation of mitotic recombination // traceable author statement /// 6302 // double-strand break repair // traceable author statement /// 7004 // telomere maintenance via telomerase // traceable author statement /// 7049 // cell cycle // inferred from electronic annotation /// 7126 // meiosis // inferred from electronic annotation /// 7131 // meiotic recombination // traceable author state…	14 // single-stranded DNA specific endodeoxyribonuclease activity // traceable author statement /// 166 // nucleotide binding // inferred from electronic annotation /// 3677 // DNA binding // traceable author statement /// 4518 // nuclease activity // inferred from electronic annotation /// 5524 // ATP binding // inferred from electronic annotation /// 8270 // zinc ion binding // inferred from el…	---
212533_at	2.78	0.000771249	WEE1	WEE1 homolog (S. pombe)	249441	74 // regulation of progression through cell cycle // traceable author statement /// 6468 // protein amino acid phosphorylation // inferred from electronic annotation /// 7049 // cell cycle // inferred from electronic annotation /// 7067 // mitosis // inferred from electronic annotation /// 51301 // cell division // inferred from electronic annotation	166 // nucleotide binding // inferred from electronic annotation /// 4674 // protein serine/threonine kinase activity // inferred from electronic annotation /// 4713 // protein-tyrosine kinase activity // traceable author statement /// 5515 // protein binding // inferred from physical interaction /// 5524 // ATP binding // inferred from electronic annotation /// 16740 // transferase activity // i…	Cell_cycle_KEGG // GenMAPP /// G1_to_S_cell_cycle_Reactome // GenMAPP /// Cell_cycle_KEGG // GenMAPP /// G1_to_S_cell_cycle_Reactome // GenMAPP /// Calcium signaling pathway // KEGG /// Cytokine-cytokine receptor interaction // KEGG /// Apoptosis // KEGG /// Dorso-ventral axis formation // KEGG /// Axon guidance // KEGG /// VEGF signaling pathway // KEGG /// Focal adhesion // KEGG /// Adherens ju…
218646_at	2.78	0.00549823	C4orf27	chromosome 4 open reading frame 27	406756	---	---	---
205412_at	2.77	0.00184055	ACAT1	acetyl-Coenzyme A acetyltransferase 1 (acetoacetyl Coenzyme A thiolase)	232375	---	3985 // acetyl-CoA C-acetyltransferase activity // traceable author statement /// 8415 // acyltransferase activity // inferred from electronic annotation /// 16740 // transferase activity // inferred from electronic annotation /// 3985 // acetyl-CoA C-acetyltransferase activity // inferred from electronic annotation	Synthesis_and_Degradation_of_Keton_Bodies_KEGG // GenMAPP /// Synthesis_and_Degradation_of_Keton_Bodies_KEGG // GenMAPP /// Fatty acid metabolism // KEGG /// Synthesis and degradation of ketone bodies // KEGG /// Valine, leucine and isoleucine degradation // KEGG /// Lysine degradation // KEGG /// Tryptophan metabolism // KEGG /// Pyruvate metabolism // KEGG /// Benzoate degradation via CoA ligat…
222955_s_at	2.77	0.00706579	FAM45B /// FAM45A	family with sequence similarity 45, member B /// family with sequence similarity 45, member A	558514	---	---	---
227717_at	2.77	0.0389954	FLJ41603	FLJ41603 protein	256206	35023 // regulation of Rho protein signal transduction // inferred from electronic annotation	5089 // Rho guanyl-nucleotide exchange factor activity // inferred from electronic annotation /// 5515 // protein binding // inferred from electronic annotation	---
227960_s_at	2.77	0.0406517	FAHD1	fumarylacetoacetate hydrolase domain containing 1	513265	8152 // metabolism // inferred from electronic annotation	287 // magnesium ion binding // inferred from electronic annotation /// 5509 // calcium ion binding // inferred from electronic annotation /// 16787 // hydrolase activity // inferred from electronic annotation /// 3824 // catalytic activity // inferred from electronic annotation /// 46872 // metal ion binding // inferred from electronic annotation	---
210125_s_at	2.76	8.63e-05	BANF1	barrier to autointegration factor 1	433759	9615 // response to virus // traceable author statement	3677 // DNA binding // inferred from electronic annotation	---
202124_s_at	2.76	0.00170885	TRAK2	trafficking protein, kinesin binding 2	152774	6836 // neurotransmitter transport // inferred from sequence or structural similarity	5478 // intracellular transporter activity // inferred from sequence or structural similarity /// 50811 // GABA receptor binding // non-traceable author statement /// 5515 // protein binding // inferred from physical interaction /// 5102 // receptor binding // inferred from sequence or structural similarity	---
224867_at	2.76	0.0019578	C1orf151	chromosome 1 open reading frame 151	466662	6412 // protein biosynthesis // inferred from electronic annotation	3735 // structural constituent of ribosome // inferred from electronic annotation	---
218981_at	2.76	0.0156348	ACN9	ACN9 homolog (S. cerevisiae)	592269	6094 // gluconeogenesis // inferred from sequence or structural similarity	---	---
202983_at	2.76	0.023604	SMARCA3	SWI/SNF related, matrix associated, actin dependent regulator of chromatin, subfamily a, member 3	3068	6350 // transcription // inferred from electronic annotation /// 6355 // regulation of transcription, DNA-dependent // traceable author statement /// 16568 // chromatin modification // inferred from electronic annotation	166 // nucleotide binding // inferred from electronic annotation /// 3677 // DNA binding // traceable author statement /// 5515 // protein binding // inferred from electronic annotation /// 5524 // ATP binding // inferred from electronic annotation /// 8026 // ATP-dependent helicase activity // inferred from electronic annotation /// 8270 // zinc ion binding // inferred from electronic annotation…	---
238657_at	2.76	0.0256113	UBXD3	UBX domain containing 3	432503	---	---	---
223515_s_at	2.75	0.00736166	COQ3	coenzyme Q3 homolog, methyltransferase (S. cerevisiae)	299208	6744 // ubiquinone biosynthesis // traceable author statement /// 6744 // ubiquinone biosynthesis // inferred from electronic annotation	4395 // hexaprenyldihydroxybenzoate methyltransferase activity // inferred from electronic annotation /// 8171 // O-methyltransferase activity // traceable author statement /// 8425 // 2-polyprenyl-6-methoxy-1,4-benzoquinone methyltransferase activity // inferred from electronic annotation /// 16740 // transferase activity // inferred from electronic annotation /// 8168 // methyltransferase activ…	---
227609_at	2.75	0.04282	EPSTI1	epithelial stromal interaction 1 (breast)	546467	---	---	---
203921_at	2.74	0.00193601	CHST2	carbohydrate (N-acetylglucosamine-6-O) sulfotransferase 2	8786	5975 // carbohydrate metabolism // inferred from electronic annotation /// 6044 // N-acetylglucosamine metabolism // inferred from direct assay /// 6790 // sulfur metabolism // inferred from direct assay /// 6954 // inflammatory response // inferred from electronic annotation	1517 // N-acetylglucosamine 6-O-sulfotransferase activity // inferred from direct assay /// 16740 // transferase activity // inferred from electronic annotation /// 8146 // sulfotransferase activity // inferred from electronic annotation	---
1552715_a_at	2.74	0.00328807	RXFP1	relaxin/insulin-like family peptide receptor 1	591686	7165 // signal transduction // inferred from electronic annotation /// 7186 // G-protein coupled receptor protein signaling pathway // inferred from electronic annotation	1584 // rhodopsin-like receptor activity // inferred from electronic annotation /// 4872 // receptor activity // inferred from electronic annotation /// 4930 // G-protein coupled receptor activity // inferred from direct assay /// 4930 // G-protein coupled receptor activity // inferred from electronic annotation /// 4871 // signal transducer activity // inferred from electronic annotation	GPCRDB_Other // GenMAPP /// Smooth_muscle_contraction // GenMAPP
216228_s_at	2.74	0.0246354	WDHD1	WD repeat and HMG-box DNA binding protein 1	385998	6355 // regulation of transcription, DNA-dependent // inferred from electronic annotation	3677 // DNA binding // inferred from electronic annotation /// 3677 // DNA binding // traceable author statement	---
212694_s_at	2.74	0.0246964	PCCB	propionyl Coenzyme A carboxylase, beta polypeptide	63788	9062 // fatty acid catabolism // not recorded	4658 // propionyl-CoA carboxylase activity // traceable author statement /// 16874 // ligase activity // inferred from electronic annotation /// 4658 // propionyl-CoA carboxylase activity // inferred from electronic annotation	Valine, leucine and isoleucine degradation // KEGG /// Propanoate metabolism // KEGG
241937_s_at	2.73	0.00184055	WDR4	WD repeat domain 4	248815	8033 // tRNA processing // inferred from electronic annotation	---	---
202107_s_at	2.73	0.00654129	MCM2	MCM2 minichromosome maintenance deficient 2, mitotin (S. cerevisiae)	477481	6260 // DNA replication // traceable author statement /// 6270 // DNA replication initiation // inferred from electronic annotation /// 6350 // transcription // inferred from electronic annotation /// 6355 // regulation of transcription, DNA-dependent // inferred from electronic annotation /// 7049 // cell cycle // traceable author statement /// 6260 // DNA replication // inferred from electronic…	166 // nucleotide binding // inferred from electronic annotation /// 3677 // DNA binding // traceable author statement /// 5515 // protein binding // inferred from physical interaction /// 5524 // ATP binding // inferred from electronic annotation /// 8094 // DNA-dependent ATPase activity // inferred from electronic annotation /// 8270 // zinc ion binding // inferred from electronic annotation //…	Cell_cycle_KEGG // GenMAPP /// DNA_replication_Reactome // GenMAPP /// G1_to_S_cell_cycle_Reactome // GenMAPP /// Cell_cycle_KEGG // GenMAPP /// DNA_replication_Reactome // GenMAPP /// G1_to_S_cell_cycle_Reactome // GenMAPP
208370_s_at	2.73	0.0120539	DSCR1	Down syndrome critical region gene 1	282326	7165 // signal transduction // traceable author statement /// 7417 // central nervous system development // traceable author statement /// 8015 // circulation // traceable author statement /// 19722 // calcium-mediated signaling // inferred from electronic annotation	166 // nucleotide binding // inferred from electronic annotation /// 3700 // transcription factor activity // traceable author statement /// 3677 // DNA binding // traceable author statement	---
228708_at	2.73	0.0190627	RAB27B	RAB27B, member RAS oncogene family	25318	7264 // small GTPase mediated signal transduction // inferred from electronic annotation /// 15031 // protein transport // inferred from electronic annotation	166 // nucleotide binding // inferred from electronic annotation /// 3924 // GTPase activity // traceable author statement /// 5525 // GTP binding // inferred from electronic annotation	---
201755_at	2.72	0.00408301	MCM5	MCM5 minichromosome maintenance deficient 5, cell division cycle 46 (S. cerevisiae)	517582	74 // regulation of progression through cell cycle // traceable author statement /// 6260 // DNA replication // traceable author statement /// 6270 // DNA replication initiation // inferred from electronic annotation /// 6350 // transcription // inferred from electronic annotation /// 6355 // regulation of transcription, DNA-dependent // inferred from electronic annotation /// 6260 // DNA replica…	166 // nucleotide binding // inferred from electronic annotation /// 3677 // DNA binding // inferred from electronic annotation /// 5515 // protein binding // inferred from physical interaction /// 5524 // ATP binding // inferred from electronic annotation /// 8094 // DNA-dependent ATPase activity // inferred from electronic annotation /// 3676 // nucleic acid binding // inferred from electronic …	Cell_cycle_KEGG // GenMAPP /// DNA_replication_Reactome // GenMAPP /// G1_to_S_cell_cycle_Reactome // GenMAPP
218147_s_at	2.72	0.0107912	GLT8D1	glycosyltransferase 8 domain containing 1	297304	16051 // carbohydrate biosynthesis // inferred from electronic annotation	16758 // transferase activity, transferring hexosyl groups // inferred from electronic annotation /// 16740 // transferase activity // inferred from electronic annotation	---
202125_s_at	2.72	0.0138282	TRAK2	trafficking protein, kinesin binding 2	152774	6836 // neurotransmitter transport // inferred from sequence or structural similarity	5478 // intracellular transporter activity // inferred from sequence or structural similarity /// 50811 // GABA receptor binding // non-traceable author statement /// 5515 // protein binding // inferred from physical interaction /// 5102 // receptor binding // inferred from sequence or structural similarity	---
205406_s_at	2.71	0.0103008	SPA17	sperm autoantigenic protein 17	286233	7165 // signal transduction // inferred from electronic annotation /// 7283 // spermatogenesis // traceable author statement /// 7338 // fertilization (sensu Metazoa) // traceable author statement /// 7339 // binding of sperm to zona pellucida // inferred from electronic annotation	8603 // cAMP-dependent protein kinase regulator activity // inferred from electronic annotation	---
205768_s_at	2.71	0.0125071	SLC27A2	solute carrier family 27 (fatty acid transporter), member 2	11729	38 // very-long-chain fatty acid metabolism // traceable author statement /// 6629 // lipid metabolism // inferred from electronic annotation /// 8152 // metabolism // inferred from electronic annotation /// 6631 // fatty acid metabolism // inferred from electronic annotation	166 // nucleotide binding // inferred from electronic annotation /// 3824 // catalytic activity // inferred from electronic annotation /// 4467 // long-chain-fatty-acid-CoA ligase activity // traceable author statement /// 16874 // ligase activity // inferred from electronic annotation /// 4467 // long-chain-fatty-acid-CoA ligase activity // inferred from electronic annotation	---
205769_at	2.71	0.0259997	SLC27A2	solute carrier family 27 (fatty acid transporter), member 2	11729	38 // very-long-chain fatty acid metabolism // traceable author statement /// 6629 // lipid metabolism // inferred from electronic annotation /// 8152 // metabolism // inferred from electronic annotation /// 6631 // fatty acid metabolism // inferred from electronic annotation	166 // nucleotide binding // inferred from electronic annotation /// 3824 // catalytic activity // inferred from electronic annotation /// 4467 // long-chain-fatty-acid-CoA ligase activity // traceable author statement /// 16874 // ligase activity // inferred from electronic annotation /// 4467 // long-chain-fatty-acid-CoA ligase activity // inferred from electronic annotation	---
201413_at	2.7	0.00287886	HSD17B4	hydroxysteroid (17-beta) dehydrogenase 4	406861	6629 // lipid metabolism // inferred from electronic annotation /// 6631 // fatty acid metabolism // inferred from electronic annotation /// 8152 // metabolism // inferred from electronic annotation	3857 // 3-hydroxyacyl-CoA dehydrogenase activity // inferred from electronic annotation /// 4303 // estradiol 17-beta-dehydrogenase activity // traceable author statement /// 5498 // sterol carrier activity // traceable author statement /// 15248 // sterol transporter activity // traceable author statement /// 16491 // oxidoreductase activity // inferred from electronic annotation /// 16829 // ly…	Steroid_Biosynthesis // GenMAPP
203031_s_at	2.7	0.00450118	UROS	uroporphyrinogen III synthase (congenital erythropoietic porphyria)	501376	6780 // uroporphyrinogen III biosynthesis // traceable author statement /// 6783 // heme biosynthesis // inferred from electronic annotation /// 6779 // porphyrin biosynthesis // inferred from electronic annotation /// 8152 // metabolism // inferred from electronic annotation /// 9236 // cobalamin biosynthesis // inferred from electronic annotation	4852 // uroporphyrinogen-III synthase activity // inferred from electronic annotation /// 16829 // lyase activity // inferred from electronic annotation /// 4851 // uroporphyrin-III C-methyltransferase activity // inferred from electronic annotation /// 16491 // oxidoreductase activity // inferred from electronic annotation	Heme_Biosynthesis // GenMAPP /// Heme_Biosynthesis // GenMAPP /// Porphyrin and chlorophyll metabolism // KEGG
219979_s_at	2.7	0.0181388	C11orf73	chromosome 11 open reading frame 73	283322	7275 // development // inferred from electronic annotation	---	---
223253_at	2.7	0.0237213	EPDR1	ependymin related protein 1 (zebrafish)	563491	7160 // cell-matrix adhesion // inferred from electronic annotation	5509 // calcium ion binding // inferred from electronic annotation	---
223320_s_at	2.7	0.0346292	ABCB10	ATP-binding cassette, sub-family B (MDR/TAP), member 10	17614	6810 // transport // non-traceable author statement /// 6810 // transport // inferred from electronic annotation	166 // nucleotide binding // inferred from electronic annotation /// 5524 // ATP binding // non-traceable author statement /// 16887 // ATPase activity // inferred from electronic annotation /// 42626 // ATPase activity, coupled to transmembrane movement of substances // inferred from electronic annotation /// 5524 // ATP binding // inferred from electronic annotation /// 17111 // nucleoside-trip…	---
206077_at	2.7	0.041428	KEL	Kell blood group, metalloendopeptidase	368588	6487 // protein amino acid N-linked glycosylation // traceable author statement /// 6508 // proteolysis // inferred from electronic annotation /// 42310 // vasoconstriction // traceable author statement	4175 // endopeptidase activity // traceable author statement /// 4245 // neprilysin activity // inferred from electronic annotation /// 5515 // protein binding // inferred from physical interaction /// 8237 // metallopeptidase activity // inferred from electronic annotation /// 8270 // zinc ion binding // inferred from electronic annotation /// 16511 // endothelin-converting enzyme activity // in…	Hematopoietic cell lineage // KEGG /// Alzheimer's disease // KEGG
218394_at	2.69	0.000397877	ROGDI	rogdi homolog (Drosophila)	459795	---	---	---
200629_at	2.69	0.00496219	WARS	tryptophanyl-tRNA synthetase	497599	6412 // protein biosynthesis // traceable author statement /// 6436 // tryptophanyl-tRNA aminoacylation // inferred from electronic annotation /// 6436 // tryptophanyl-tRNA aminoacylation // traceable author statement /// 8285 // negative regulation of cell proliferation // traceable author statement /// 6412 // protein biosynthesis // inferred from electronic annotation /// 6418 // tRNA aminoacy…	166 // nucleotide binding // inferred from electronic annotation /// 4830 // tryptophan-tRNA ligase activity // inferred from electronic annotation /// 5524 // ATP binding // inferred from electronic annotation /// 16874 // ligase activity // inferred from electronic annotation /// 4812 // aminoacyl-tRNA ligase activity // inferred from electronic annotation	Tryptophan metabolism // KEGG /// Aminoacyl-tRNA biosynthesis // KEGG
224634_at	2.69	0.0136495	GPATC4	G patch domain containing 4	193832	---	3676 // nucleic acid binding // inferred from electronic annotation	---
219258_at	2.69	0.0141807	TIPIN	TIMELESS interacting protein	572318	---	---	---
203360_s_at	2.69	0.0215993	MYCBP	c-myc binding protein	591506	6350 // transcription // inferred from electronic annotation /// 6355 // regulation of transcription, DNA-dependent // inferred from electronic annotation	3713 // transcription coactivator activity // not recorded /// 5515 // protein binding // inferred from physical interaction	Calcium_regulation_in_cardiac_cells // GenMAPP
226437_at	2.68	0.0017874	YIF1B	Yip1 interacting factor homolog B (S. cerevisiae)	280741	---	---	---
231780_at	2.68	0.0467935	GBGT1	globoside alpha-1,3-N-acetylgalactosaminyltransferase 1	495419	5975 // carbohydrate metabolism // inferred from electronic annotation	16758 // transferase activity, transferring hexosyl groups // inferred from electronic annotation /// 30145 // manganese ion binding // inferred from electronic annotation /// 46872 // metal ion binding // inferred from electronic annotation /// 16740 // transferase activity // inferred from electronic annotation /// 16757 // transferase activity, transferring glycosyl groups // inferred from ele…	Glycosphingolipid biosynthesis - globoseries // KEGG /// Glycan structures - biosynthesis 2 // KEGG
222548_s_at	2.67	0.00129549	MAP4K4	mitogen-activated protein kinase kinase kinase kinase 4	431550	6468 // protein amino acid phosphorylation // inferred from direct assay /// 6468 // protein amino acid phosphorylation // inferred from electronic annotation /// 6950 // response to stress // inferred from direct assay /// 7243 // protein kinase cascade // inferred from direct assay	166 // nucleotide binding // inferred from electronic annotation /// 4674 // protein serine/threonine kinase activity // inferred from direct assay /// 4674 // protein serine/threonine kinase activity // inferred from electronic annotation /// 5083 // small GTPase regulator activity // inferred from electronic annotation /// 5524 // ATP binding // inferred from direct assay /// 5524 // ATP bindin…	---
37966_at	2.67	0.0017577	PARVB	parvin, beta	475074	7155 // cell adhesion // inferred from electronic annotation	3779 // actin binding // inferred from electronic annotation /// 5515 // protein binding // inferred from electronic annotation	---
204730_at	2.67	0.0194625	RIMS3	regulating synaptic membrane exocytosis 3	434924	6836 // neurotransmitter transport // inferred from electronic annotation /// 6887 // exocytosis // inferred from electronic annotation /// 6810 // transport // inferred from electronic annotation	---	---
204788_s_at	2.67	0.0256164	PPOX	protoporphyrinogen oxidase	517373	6118 // electron transport // inferred from direct assay /// 6783 // heme biosynthesis // inferred from direct assay /// 6779 // porphyrin biosynthesis // inferred from direct assay /// 6118 // electron transport // inferred from electronic annotation /// 6779 // porphyrin biosynthesis // inferred from electronic annotation /// 6783 // heme biosynthesis // inferred from electronic annotation	4729 // protoporphyrinogen oxidase activity // inferred from direct assay /// 16491 // oxidoreductase activity // inferred from electronic annotation /// 50660 // FAD binding // traceable author statement /// 4729 // protoporphyrinogen oxidase activity // inferred from electronic annotation	Heme_Biosynthesis // GenMAPP /// Porphyrin and chlorophyll metabolism // KEGG
208999_at	2.67	0.0335939	2007-09-08	septin 8	533017	7049 // cell cycle // inferred from electronic annotation	166 // nucleotide binding // inferred from electronic annotation /// 5515 // protein binding // inferred from physical interaction /// 5525 // GTP binding // inferred from electronic annotation	---
222682_s_at	2.67	0.0395836	C5orf3	chromosome 5 open reading frame 3	166551	---	17076 // purine nucleotide binding // non-traceable author statement	---
226980_at	2.67	0.0395836	DEPDC1B	DEP domain containing 1B	482233	7165 // signal transduction // inferred from electronic annotation /// 7242 // intracellular signaling cascade // inferred from electronic annotation	---	---
1553976_a_at	2.66	0.00400608	RP11-529I10.4	deleted in a mouse model of primary ciliary dyskinesia	555926	---	---	---
230329_s_at	2.66	0.0150199	NUDT6	nudix (nucleoside diphosphate linked moiety X)-type motif 6	558459	---	8083 // growth factor activity // traceable author statement /// 16787 // hydrolase activity // inferred from electronic annotation	---
205024_s_at	2.66	0.0171467	RAD51	RAD51 homolog (RecA homolog, E. coli) (S. cerevisiae)	631709	724 // double-strand break repair via homologous recombination // inferred from sequence or structural similarity /// 724 // double-strand break repair via homologous recombination // traceable author statement /// 6268 // DNA unwinding during replication // inferred from direct assay /// 6268 // DNA unwinding during replication // inferred from sequence or structural similarity /// 6281 // DNA r…	166 // nucleotide binding // inferred from electronic annotation /// 3684 // damaged DNA binding // inferred from electronic annotation /// 3690 // double-stranded DNA binding // inferred from direct assay /// 3690 // double-stranded DNA binding // inferred from sequence or structural similarity /// 3697 // single-stranded DNA binding // inferred from direct assay /// 5515 // protein binding // i…	---
226452_at	2.66	0.0318693	PDK1	pyruvate dehydrogenase kinase, isozyme 1	470633	6006 // glucose metabolism // traceable author statement /// 6468 // protein amino acid phosphorylation // inferred from electronic annotation /// 7264 // small GTPase mediated signal transduction // traceable author statement	4740 // [pyruvate dehydrogenase (lipoamide)] kinase activity // traceable author statement /// 5524 // ATP binding // inferred from electronic annotation /// 16740 // transferase activity // inferred from electronic annotation /// 16301 // kinase activity // inferred from electronic annotation /// 4672 // protein kinase activity // traceable author statement	Krebs-TCA_Cycle // GenMAPP
225925_s_at	2.65	0.00521607	USP48	ubiquitin specific peptidase 48	467524	6464 // protein modification // inferred from electronic annotation /// 6511 // ubiquitin-dependent protein catabolism // inferred from electronic annotation	4197 // cysteine-type endopeptidase activity // inferred from electronic annotation /// 4221 // ubiquitin thiolesterase activity // inferred from electronic annotation /// 8233 // peptidase activity // inferred from electronic annotation	---
243539_at	2.65	0.0111244	TNC	Tenascin C (hexabrachion)	143250	7155 // cell adhesion // traceable author statement /// 7155 // cell adhesion // inferred from electronic annotation	5515 // protein binding // inferred from electronic annotation /// 5488 // binding // traceable author statement	---
233375_at	2.65	0.0354285	EFCAB2	EF-hand calcium binding domain 2	134857	---	5509 // calcium ion binding // inferred from electronic annotation	---
224944_at	2.64	0.00242008	TMPO	thymopoietin	11355	---	3677 // DNA binding // inferred from electronic annotation /// 5521 // lamin binding // traceable author statement	---
218487_at	2.64	0.0144716	ALAD	aminolevulinate, delta-, dehydratase	1227	6783 // heme biosynthesis // inferred from electronic annotation /// 6783 // heme biosynthesis // traceable author statement /// 6779 // porphyrin biosynthesis // inferred from electronic annotation	4655 // porphobilinogen synthase activity // inferred from electronic annotation /// 4655 // porphobilinogen synthase activity // traceable author statement /// 8270 // zinc ion binding // inferred from electronic annotation /// 16829 // lyase activity // inferred from electronic annotation /// 46872 // metal ion binding // inferred from electronic annotation /// 3824 // catalytic activity // tra…	Heme_Biosynthesis // GenMAPP /// Porphyrin and chlorophyll metabolism // KEGG
227921_at	2.64	0.0327257	---	---	---	---	---	---
203615_x_at	2.63	0.000241629	SULT1A1	sulfotransferase family, cytosolic, 1A, phenol-preferring, member 1	567342	6584 // catecholamine metabolism // inferred from electronic annotation /// 6629 // lipid metabolism // inferred from electronic annotation /// 8202 // steroid metabolism // inferred from electronic annotation /// 9308 // amine metabolism // traceable author statement	4062 // aryl sulfotransferase activity // inferred from electronic annotation /// 8146 // sulfotransferase activity // inferred from electronic annotation /// 16740 // transferase activity // inferred from electronic annotation /// 8146 // sulfotransferase activity // traceable author statement	---
222912_at	2.63	0.00544001	ARRB1	arrestin, beta 1	503284	7165 // signal transduction // traceable author statement /// 7600 // sensory perception // inferred from electronic annotation /// 7165 // signal transduction // inferred from electronic annotation /// 50896 // response to stimulus // inferred from electronic annotation	4857 // enzyme inhibitor activity // traceable author statement	Calcium_regulation_in_cardiac_cells // GenMAPP /// Smooth_muscle_contraction // GenMAPP
201555_at	2.63	0.00888519	MCM3	MCM3 minichromosome maintenance deficient 3 (S. cerevisiae)	179565	6260 // DNA replication // inferred from electronic annotation /// 6270 // DNA replication initiation // inferred from electronic annotation /// 6270 // DNA replication initiation // traceable author statement /// 6350 // transcription // inferred from electronic annotation /// 6355 // regulation of transcription, DNA-dependent // inferred from electronic annotation /// 7049 // cell cycle // infe…	166 // nucleotide binding // inferred from electronic annotation /// 3677 // DNA binding // inferred from electronic annotation /// 3677 // DNA binding // traceable author statement /// 5515 // protein binding // inferred from physical interaction /// 5524 // ATP binding // inferred from electronic annotation /// 8094 // DNA-dependent ATPase activity // inferred from electronic annotation /// 171…	Cell_cycle_KEGG // GenMAPP /// DNA_replication_Reactome // GenMAPP /// G1_to_S_cell_cycle_Reactome // GenMAPP /// Cell_cycle_KEGG // GenMAPP /// DNA_replication_Reactome // GenMAPP /// G1_to_S_cell_cycle_Reactome // GenMAPP
1564520_s_at	2.63	0.00896605	PRMT5	protein arginine methyltransferase 5	367854	7088 // regulation of mitosis // traceable author statement /// 8283 // cell proliferation // traceable author statement /// 35246 // peptidyl-arginine N-methylation // inferred from direct assay	8168 // methyltransferase activity // inferred from direct assay /// 8168 // methyltransferase activity // inferred from electronic annotation /// 16740 // transferase activity // inferred from electronic annotation	---
208971_at	2.63	0.0104248	SMAD3 /// UROD	SMAD, mothers against DPP homolog 3 (Drosophila) /// uroporphyrinogen decarboxylase	569432	6350 // transcription // inferred from electronic annotation /// 6355 // regulation of transcription, DNA-dependent // inferred from electronic annotation /// 6366 // transcription from RNA polymerase II promoter // traceable author statement /// 7179 // transforming growth factor beta receptor signaling pathway // traceable author statement /// 6779 // porphyrin biosynthesis // inferred from ele…	3700 // transcription factor activity // traceable author statement /// 5515 // protein binding // inferred from physical interaction /// 4853 // uroporphyrinogen decarboxylase activity // inferred from electronic annotation /// 4853 // uroporphyrinogen decarboxylase activity // traceable author statement /// 16829 // lyase activity // inferred from electronic annotation /// 3700 // transcription…	Heme_Biosynthesis // GenMAPP /// Porphyrin and chlorophyll metabolism // KEGG
225501_at	2.63	0.0127209	PHF6	PHD finger protein 6	356501	6350 // transcription // inferred from electronic annotation /// 6355 // regulation of transcription, DNA-dependent // inferred from electronic annotation	5515 // protein binding // inferred from electronic annotation /// 8270 // zinc ion binding // inferred from electronic annotation /// 46872 // metal ion binding // inferred from electronic annotation	---
213188_s_at	2.63	0.0316797	MINA	MYC induced nuclear antigen	476970	---	---	---
218317_x_at	2.62	0.00184055	GIYD2 /// GIYD1 /// LOC644122	GIY-YIG domain containing 2 /// GIY-YIG domain containing 1 /// similar to GIY-YIG domain containing 2 isoform 1	---	6281 // DNA repair // inferred from electronic annotation	4518 // nuclease activity // inferred from electronic annotation	---
218138_at	2.62	0.00211636	MKKS	McKusick-Kaufman syndrome	472119	6457 // protein folding // traceable author statement /// 7507 // heart development // traceable author statement /// 7601 // visual perception // inferred from electronic annotation /// 8406 // gonad development // traceable author statement /// 50896 // response to stimulus // inferred from electronic annotation /// 6457 // protein folding // inferred from electronic annotation /// 44267 // cel…	166 // nucleotide binding // inferred from electronic annotation /// 5524 // ATP binding // inferred from electronic annotation /// 51082 // unfolded protein binding // traceable author statement /// 5515 // protein binding // inferred from electronic annotation /// 51082 // unfolded protein binding // inferred from electronic annotation	---
217728_at	2.61	0.00568219	S100A6	S100 calcium binding protein A6 (calcyclin)	275243	74 // regulation of progression through cell cycle // inferred from electronic annotation /// 7049 // cell cycle // inferred from electronic annotation /// 7165 // signal transduction // traceable author statement /// 7267 // cell-cell signaling // not recorded /// 7409 // axonogenesis // non-traceable author statement /// 8283 // cell proliferation // inferred from electronic annotation /// 4814…	5509 // calcium ion binding // non-traceable author statement /// 8083 // growth factor activity // inferred from electronic annotation /// 42803 // protein homodimerization activity // inferred from physical interaction /// 48154 // S100 beta binding // inferred from physical interaction /// 48155 // S100 alpha binding // inferred from physical interaction /// 48306 // calcium-dependent protein …	Prostaglandin_synthesis_regulation // GenMAPP
206116_s_at	2.61	0.0167484	TPM1	tropomyosin 1 (alpha)	133892	6928 // cell motility // traceable author statement /// 6937 // regulation of muscle contraction // traceable author statement /// 8016 // regulation of heart contraction // traceable author statement /// 6633 // fatty acid biosynthesis // inferred from electronic annotation	3779 // actin binding // inferred from electronic annotation /// 5200 // structural constituent of cytoskeleton // inferred from electronic annotation /// 8307 // structural constituent of muscle // traceable author statement /// 3743 // translation initiation factor activity // inferred from electronic annotation /// 3824 // catalytic activity // inferred from electronic annotation	Striated_muscle_contraction // GenMAPP /// Striated_muscle_contraction // GenMAPP /// Striated_muscle_contraction // GenMAPP
204305_at	2.6	0.00406837	MIPEP	mitochondrial intermediate peptidase	507498	6508 // proteolysis // inferred from electronic annotation /// 6627 // mitochondrial protein processing // traceable author statement	287 // magnesium ion binding // inferred from electronic annotation /// 4243 // mitochondrial intermediate peptidase activity // inferred from electronic annotation /// 5506 // iron ion binding // inferred from electronic annotation /// 5509 // calcium ion binding // inferred from electronic annotation /// 8270 // zinc ion binding // inferred from electronic annotation /// 30145 // manganese ion …	---
219008_at	2.6	0.00517069	C2orf43	chromosome 2 open reading frame 43	187823	---	16787 // hydrolase activity // inferred from electronic annotation	---
224392_s_at	2.6	0.00681227	OPN3	opsin 3 (encephalopsin, panopsin) /// opsin 3 (encephalopsin, panopsin)	---	7165 // signal transduction // inferred from electronic annotation /// 7186 // G-protein coupled receptor protein signaling pathway // inferred from electronic annotation /// 7186 // G-protein coupled receptor protein signaling pathway // traceable author statement /// 7601 // visual perception // inferred from electronic annotation /// 7602 // phototransduction // non-traceable author statement …	1584 // rhodopsin-like receptor activity // inferred from electronic annotation /// 4872 // receptor activity // inferred from electronic annotation /// 8020 // G-protein coupled photoreceptor activity // non-traceable author statement /// 4871 // signal transducer activity // inferred from electronic annotation /// 4930 // G-protein coupled receptor activity // inferred from electronic annotatio…	GPCRDB_Class_A_Rhodopsin-like // GenMAPP
200791_s_at	2.6	0.0219005	IQGAP1	IQ motif containing GTPase activating protein 1	430551	7165 // signal transduction // traceable author statement /// 46580 // negative regulation of Ras protein signal transduction // inferred from electronic annotation /// 51056 // regulation of small GTPase mediated signal transduction // inferred from electronic annotation /// 7264 // small GTPase mediated signal transduction // inferred from electronic annotation	5095 // GTPase inhibitor activity // traceable author statement /// 5099 // Ras GTPase activator activity // inferred from electronic annotation /// 5516 // calmodulin binding // traceable author statement /// 5515 // protein binding // inferred from physical interaction /// 5096 // GTPase activator activity // inferred from electronic annotation /// 5516 // calmodulin binding // inferred from el…	G13_Signaling_Pathway // GenMAPP /// G13_Signaling_Pathway // GenMAPP
219423_x_at	2.6	0.0493593	TNFRSF25	tumor necrosis factor receptor superfamily, member 25	462529	6915 // apoptosis // inferred from electronic annotation /// 6955 // immune response // inferred from electronic annotation /// 7165 // signal transduction // inferred from electronic annotation /// 7166 // cell surface receptor linked signal transduction // traceable author statement /// 8624 // induction of apoptosis by extracellular signals // traceable author statement /// 42981 // regulation…	4872 // receptor activity // non-traceable author statement /// 4888 // transmembrane receptor activity // inferred from electronic annotation /// 5031 // tumor necrosis factor receptor activity // traceable author statement /// 5515 // protein binding // inferred from electronic annotation /// 4872 // receptor activity // inferred from electronic annotation	Apoptosis // GenMAPP
220486_x_at	2.59	0.00180055	TMEM164 /// LOC653522	transmembrane protein 164 /// similar to hypothetical protein FLJ22679	496572	---	---	---
1553984_s_at	2.59	0.00736166	DTYMK /// LOC643109 /// LOC653208	deoxythymidylate kinase (thymidylate kinase) /// hypothetical protein LOC643109 /// similar to deoxythymidylate kinase (thymidylate kinase)	599355	6233 // dTDP biosynthesis // inferred from electronic annotation /// 6235 // dTTP biosynthesis // inferred from electronic annotation /// 6259 // DNA metabolism // not recorded /// 7049 // cell cycle // traceable author statement /// 8283 // cell proliferation // traceable author statement /// 9165 // nucleotide biosynthesis // inferred from electronic annotation	166 // nucleotide binding // inferred from electronic annotation /// 4798 // thymidylate kinase activity // traceable author statement /// 5524 // ATP binding // inferred from electronic annotation /// 16301 // kinase activity // inferred from electronic annotation /// 16740 // transferase activity // inferred from electronic annotation /// 4798 // thymidylate kinase activity // inferred from ele…	Pyrimidine metabolism // KEGG
222036_s_at	2.59	0.0246947	MCM4	MCM4 minichromosome maintenance deficient 4 (S. cerevisiae)	460184	6260 // DNA replication // non-traceable author statement /// 6270 // DNA replication initiation // inferred from electronic annotation /// 6350 // transcription // inferred from electronic annotation /// 6355 // regulation of transcription, DNA-dependent // inferred from electronic annotation /// 6260 // DNA replication // inferred from electronic annotation	166 // nucleotide binding // inferred from electronic annotation /// 3677 // DNA binding // inferred from electronic annotation /// 5515 // protein binding // inferred from physical interaction /// 5524 // ATP binding // non-traceable author statement /// 8094 // DNA-dependent ATPase activity // inferred from electronic annotation /// 17111 // nucleoside-triphosphatase activity // inferred from e…	Cell_cycle_KEGG // GenMAPP /// DNA_replication_Reactome // GenMAPP /// G1_to_S_cell_cycle_Reactome // GenMAPP
213253_at	2.59	0.0485016	SMC2L1	SMC2 structural maintenance of chromosomes 2-like 1 (yeast)	119023	7049 // cell cycle // inferred from electronic annotation /// 7067 // mitosis // inferred from electronic annotation /// 7076 // mitotic chromosome condensation // non-traceable author statement /// 51276 // chromosome organization and biogenesis // inferred from electronic annotation /// 51301 // cell division // inferred from electronic annotation /// 7076 // mitotic chromosome condensation // …	166 // nucleotide binding // inferred from electronic annotation /// 5515 // protein binding // inferred from electronic annotation /// 5524 // ATP binding // inferred from electronic annotation /// 46982 // protein heterodimerization activity // inferred from physical interaction /// 16887 // ATPase activity // inferred from electronic annotation	---
203964_at	2.58	0.0010895	NMI	N-myc (and STAT) interactor	54483	6366 // transcription from RNA polymerase II promoter // traceable author statement /// 6954 // inflammatory response // traceable author statement /// 7259 // JAK-STAT cascade // traceable author statement	3712 // transcription cofactor activity // traceable author statement /// 5515 // protein binding // inferred from physical interaction	---
213302_at	2.58	0.00520514	PFAS	phosphoribosylformylglycinamidine synthase (FGAR amidotransferase)	573976	6164 // purine nucleotide biosynthesis // inferred from electronic annotation /// 6189 // 'de novo' IMP biosynthesis // non-traceable author statement /// 6541 // glutamine metabolism // inferred from electronic annotation /// 6189 // 'de novo' IMP biosynthesis // inferred from electronic annotation	166 // nucleotide binding // inferred from electronic annotation /// 4642 // phosphoribosylformylglycinamidine synthase activity // inferred from expression pattern /// 5524 // ATP binding // inferred from electronic annotation /// 16874 // ligase activity // inferred from electronic annotation /// 3824 // catalytic activity // inferred from electronic annotation /// 4642 // phosphoribosylformylg…	Purine metabolism // KEGG
218710_at	2.58	0.0104691	TTC27	tetratricopeptide repeat domain 27	468125	---	5488 // binding // inferred from electronic annotation	---
214314_s_at	2.58	0.0164087	EIF5B	eukaryotic translation initiation factor 5B	158688	6412 // protein biosynthesis // inferred from electronic annotation /// 6446 // regulation of translational initiation // non-traceable author statement /// 6413 // translational initiation // inferred from electronic annotation	166 // nucleotide binding // inferred from electronic annotation /// 3743 // translation initiation factor activity // non-traceable author statement /// 5515 // protein binding // inferred from physical interaction /// 5525 // GTP binding // inferred from electronic annotation /// 3743 // translation initiation factor activity // inferred from electronic annotation	Translation_Factors // GenMAPP /// Translation_Factors // GenMAPP
222781_s_at	2.58	0.0215282	C9orf40	chromosome 9 open reading frame 40	532296	---	---	---
218774_at	2.57	0.00127104	DCPS	decapping enzyme, scavenger	504249	184 // mRNA catabolism, nonsense-mediated decay // inferred from electronic annotation	16787 // hydrolase activity // inferred from electronic annotation	---
238151_at	2.57	0.00181072	TUBB6	Tubulin, beta 6	193491	7018 // microtubule-based movement // inferred from electronic annotation /// 51258 // protein polymerization // inferred from electronic annotation	166 // nucleotide binding // inferred from electronic annotation /// 3924 // GTPase activity // inferred from electronic annotation /// 5198 // structural molecule activity // inferred from electronic annotation /// 5525 // GTP binding // inferred from electronic annotation	---
216251_s_at	2.57	0.00234976	TTLL12	tubulin tyrosine ligase-like family, member 12	517670	6464 // protein modification // inferred from electronic annotation	4835 // tubulin-tyrosine ligase activity // inferred from electronic annotation /// 16874 // ligase activity // inferred from electronic annotation	---
201038_s_at	2.57	0.00246978	ANP32A	Acidic (leucine-rich) nuclear phosphoprotein 32 family, member A	458747	6913 // nucleocytoplasmic transport // inferred from direct assay /// 6913 // nucleocytoplasmic transport // non-traceable author statement /// 7242 // intracellular signaling cascade // traceable author statement	5515 // protein binding // inferred from physical interaction	---
209849_s_at	2.57	0.00915724	RAD51C	RAD51 homolog C (S. cerevisiae)	412587	6281 // DNA repair // traceable author statement /// 6310 // DNA recombination // traceable author statement /// 6259 // DNA metabolism // inferred from electronic annotation /// 6281 // DNA repair // inferred from electronic annotation /// 6310 // DNA recombination // inferred from electronic annotation /// 6974 // response to DNA damage stimulus // inferred from electronic annotation	166 // nucleotide binding // inferred from electronic annotation /// 3677 // DNA binding // traceable author statement /// 5524 // ATP binding // inferred from electronic annotation /// 8094 // DNA-dependent ATPase activity // inferred from electronic annotation /// 17111 // nucleoside-triphosphatase activity // inferred from electronic annotation /// 3677 // DNA binding // inferred from electron…	---
212780_at	2.57	0.0186259	SOS1	son of sevenless homolog 1 (Drosophila)	278733	7165 // signal transduction // non-traceable author statement /// 7265 // Ras protein signal transduction // traceable author statement /// 35023 // regulation of Rho protein signal transduction // inferred from electronic annotation /// 7264 // small GTPase mediated signal transduction // inferred from electronic annotation /// 51056 // regulation of small GTPase mediated signal transduction // …	3677 // DNA binding // inferred from electronic annotation /// 5088 // Ras guanyl-nucleotide exchange factor activity // traceable author statement /// 5089 // Rho guanyl-nucleotide exchange factor activity // traceable author statement /// 5100 // Rho GTPase activator activity // traceable author statement /// 5515 // protein binding // inferred from physical interaction /// 5085 // guanyl-nucle…	Integrin-mediated_cell_adhesion_KEGG // GenMAPP
204187_at	2.57	0.0457024	GMPR	guanosine monophosphate reductase /// guanosine monophosphate reductase	484741	9117 // nucleotide metabolism // inferred from electronic annotation /// 9409 // response to cold // traceable author statement /// 6139 // nucleobase, nucleoside, nucleotide and nucleic acid metabolism // not recorded	3920 // GMP reductase activity // traceable author statement /// 16491 // oxidoreductase activity // inferred from electronic annotation /// 30955 // potassium ion binding // inferred from electronic annotation /// 46872 // metal ion binding // inferred from electronic annotation /// 3824 // catalytic activity // inferred from electronic annotation /// 3920 // GMP reductase activity // inferred f…	---
201025_at	2.56	0.00472186	EIF5B	eukaryotic translation initiation factor 5B	158688	6412 // protein biosynthesis // inferred from electronic annotation /// 6446 // regulation of translational initiation // non-traceable author statement /// 6413 // translational initiation // inferred from electronic annotation	166 // nucleotide binding // inferred from electronic annotation /// 3743 // translation initiation factor activity // non-traceable author statement /// 5515 // protein binding // inferred from physical interaction /// 5525 // GTP binding // inferred from electronic annotation /// 3743 // translation initiation factor activity // inferred from electronic annotation	Translation_Factors // GenMAPP /// Translation_Factors // GenMAPP
218356_at	2.56	0.00514724	FTSJ2	FtsJ homolog 2 (E. coli)	279877	6364 // rRNA processing // inferred from electronic annotation	8168 // methyltransferase activity // inferred from electronic annotation /// 16740 // transferase activity // inferred from electronic annotation	---
228826_at	2.56	0.00563785	RNF43	Ring finger protein 43	584916	6512 // ubiquitin cycle // inferred from electronic annotation	5515 // protein binding // inferred from electronic annotation /// 8270 // zinc ion binding // inferred from electronic annotation /// 46872 // metal ion binding // inferred from electronic annotation	---
202732_at	2.56	0.006597	PKIG	protein kinase (cAMP-dependent, catalytic) inhibitor gamma	580808	6469 // negative regulation of protein kinase activity // inferred from electronic annotation	4862 // cAMP-dependent protein kinase inhibitor activity // traceable author statement /// 4862 // cAMP-dependent protein kinase inhibitor activity // inferred from electronic annotation /// 16301 // kinase activity // inferred from electronic annotation /// 4860 // protein kinase inhibitor activity // inferred from electronic annotation	Calcium_regulation_in_cardiac_cells // GenMAPP /// Smooth_muscle_contraction // GenMAPP
218781_at	2.56	0.00976919	SMC6	structural maintenance of chromosomes 6	526728	51276 // chromosome organization and biogenesis // inferred from electronic annotation	5524 // ATP binding // inferred from electronic annotation	---
203362_s_at	2.56	0.0163817	MAD2L1	MAD2 mitotic arrest deficient-like 1 (yeast)	591697	7049 // cell cycle // inferred from electronic annotation /// 7067 // mitosis // traceable author statement /// 7093 // mitotic checkpoint // traceable author statement /// 51301 // cell division // inferred from electronic annotation /// 7067 // mitosis // inferred from electronic annotation	5515 // protein binding // inferred from physical interaction	Cell_cycle_KEGG // GenMAPP /// Cell_cycle_KEGG // GenMAPP
211795_s_at	2.56	0.0213145	FYB	FYN binding protein (FYB-120/130)	370503	6468 // protein amino acid phosphorylation // traceable author statement /// 6607 // NLS-bearing substrate import into nucleus // traceable author statement /// 6955 // immune response // traceable author statement /// 7165 // signal transduction // traceable author statement /// 7243 // protein kinase cascade // traceable author statement /// 5975 // carbohydrate metabolism // inferred from elec…	5102 // receptor binding // traceable author statement /// 5515 // protein binding // traceable author statement /// 9045 // xylose isomerase activity // inferred from electronic annotation	---
215726_s_at	2.56	0.023356	CYB5A	cytochrome b5 type A (microsomal)	465413	6118 // electron transport // inferred from electronic annotation /// 6810 // transport // inferred from electronic annotation /// 6091 // generation of precursor metabolites and energy // not recorded	4129 // cytochrome-c oxidase activity // traceable author statement /// 5506 // iron ion binding // inferred from electronic annotation /// 46872 // metal ion binding // inferred from electronic annotation	---
222637_at	2.56	0.0389517	COMMD10	COMM domain containing 10	483136	---	---	---
202246_s_at	2.55	8.63e-05	CDK4	cyclin-dependent kinase 4	95577	74 // regulation of progression through cell cycle // traceable author statement /// 82 // G1/S transition of mitotic cell cycle // traceable author statement /// 6468 // protein amino acid phosphorylation // inferred from electronic annotation /// 7049 // cell cycle // inferred from electronic annotation /// 8283 // cell proliferation // traceable author statement /// 51301 // cell division // i…	166 // nucleotide binding // inferred from electronic annotation /// 4672 // protein kinase activity // inferred from electronic annotation /// 4693 // cyclin-dependent protein kinase activity // traceable author statement /// 5515 // protein binding // inferred from physical interaction /// 5524 // ATP binding // inferred from electronic annotation /// 16740 // transferase activity // inferred f…	Cell_cycle_KEGG // GenMAPP /// G1_to_S_cell_cycle_Reactome // GenMAPP /// Ovarian_Infertility_Genes // GenMAPP /// Cell_cycle_KEGG // GenMAPP /// G1_to_S_cell_cycle_Reactome // GenMAPP /// Ovarian_Infertility_Genes // GenMAPP
220079_s_at	2.55	0.00589417	USP48	ubiquitin specific peptidase 48	467524	6464 // protein modification // inferred from electronic annotation /// 6511 // ubiquitin-dependent protein catabolism // inferred from electronic annotation	4197 // cysteine-type endopeptidase activity // inferred from electronic annotation /// 4221 // ubiquitin thiolesterase activity // inferred from electronic annotation /// 8233 // peptidase activity // inferred from electronic annotation	---
227075_at	2.55	0.00630654	ELP3	elongation protein 3 homolog (S. cerevisiae)	491336	15986 // ATP synthesis coupled proton transport // inferred from electronic annotation /// 6754 // ATP biosynthesis // inferred from electronic annotation	3824 // catalytic activity // inferred from electronic annotation /// 5506 // iron ion binding // inferred from electronic annotation /// 46933 // hydrogen-transporting ATP synthase activity, rotational mechanism // inferred from electronic annotation /// 46961 // hydrogen-transporting ATPase activity, rotational mechanism // inferred from electronic annotation /// 8080 // N-acetyltransferase act…	---
227461_at	2.55	0.0113746	STON2	stonin 2	14248	6886 // intracellular protein transport // inferred from electronic annotation /// 30100 // regulation of endocytosis // inferred from sequence or structural similarity /// 6897 // endocytosis // inferred from electronic annotation	5515 // protein binding // inferred from physical interaction	---
204510_at	2.55	0.0339847	CDC7	CDC7 cell division cycle 7 (S. cerevisiae)	533573	82 // G1/S transition of mitotic cell cycle // traceable author statement /// 6270 // DNA replication initiation // traceable author statement /// 6468 // protein amino acid phosphorylation // inferred from electronic annotation /// 7049 // cell cycle // inferred from electronic annotation /// 7089 // traversing start control point of mitotic cell cycle // traceable author statement /// 8285 // n…	166 // nucleotide binding // inferred from electronic annotation /// 4672 // protein kinase activity // inferred from electronic annotation /// 4674 // protein serine/threonine kinase activity // inferred from electronic annotation /// 4674 // protein serine/threonine kinase activity // traceable author statement /// 5515 // protein binding // inferred from physical interaction /// 5524 // ATP bi…	Cell_cycle_KEGG // GenMAPP /// DNA_replication_Reactome // GenMAPP
216860_s_at	2.54	0.00118293	GDF11	growth differentiation factor 11	591023	1501 // skeletal development // traceable author statement /// 7399 // nervous system development // traceable author statement /// 7498 // mesoderm development // traceable author statement /// 40007 // growth // inferred from electronic annotation	5125 // cytokine activity // non-traceable author statement /// 8083 // growth factor activity // inferred from electronic annotation /// 5125 // cytokine activity // inferred from electronic annotation	---
223004_s_at	2.54	0.00126485	C3orf1	chromosome 3 open reading frame 1	477287	15031 // protein transport // inferred from electronic annotation	8565 // protein transporter activity // inferred from electronic annotation	---
204168_at	2.54	0.00233072	MGST2	microsomal glutathione S-transferase 2	81874	7165 // signal transduction // traceable author statement /// 7267 // cell-cell signaling // traceable author statement /// 19370 // leukotriene biosynthesis // inferred from electronic annotation /// 19735 // antimicrobial humoral response (sensu Vertebrata) // traceable author statement /// 6691 // leukotriene metabolism // inferred from electronic annotation /// 6691 // leukotriene metabolism …	4364 // glutathione transferase activity // traceable author statement /// 8047 // enzyme activator activity // inferred from electronic annotation /// 16740 // transferase activity // inferred from electronic annotation /// 4364 // glutathione transferase activity // inferred from electronic annotation	Glutathione metabolism // KEGG /// Metabolism of xenobiotics by cytochrome P450 // KEGG
201501_s_at	2.54	0.00280756	GRSF1	G-rich RNA sequence binding factor 1	309763	6378 // mRNA polyadenylylation // traceable author statement	166 // nucleotide binding // inferred from electronic annotation /// 3723 // RNA binding // inferred from electronic annotation /// 3729 // mRNA binding // traceable author statement /// 3676 // nucleic acid binding // inferred from electronic annotation /// 3723 // RNA binding // traceable author statement	---
218726_at	2.54	0.0131863	DKFZp762E1312	hypothetical protein DKFZp762E1312	532968	---	---	---
202950_at	2.54	0.0304986	CRYZ	crystallin, zeta (quinone reductase)	83114	7601 // visual perception // traceable author statement	3960 // NADPH:quinone reductase activity // inferred from electronic annotation /// 8270 // zinc ion binding // inferred from electronic annotation /// 16491 // oxidoreductase activity // inferred from electronic annotation	---
213733_at	2.54	0.0443849	MYO1F	myosin IF	---	---	146 // microfilament motor activity // non-traceable author statement /// 166 // nucleotide binding // inferred from electronic annotation /// 3774 // motor activity // inferred from electronic annotation /// 3779 // actin binding // non-traceable author statement /// 5516 // calmodulin binding // non-traceable author statement /// 5524 // ATP binding // inferred from electronic annotation /// 55…	---
218181_s_at	2.53	0.000723389	MAP4K4	mitogen-activated protein kinase kinase kinase kinase 4	431550	6468 // protein amino acid phosphorylation // inferred from direct assay /// 6468 // protein amino acid phosphorylation // inferred from electronic annotation /// 6950 // response to stress // inferred from direct assay /// 7243 // protein kinase cascade // inferred from direct assay	166 // nucleotide binding // inferred from electronic annotation /// 4674 // protein serine/threonine kinase activity // inferred from direct assay /// 4674 // protein serine/threonine kinase activity // inferred from electronic annotation /// 5083 // small GTPase regulator activity // inferred from electronic annotation /// 5524 // ATP binding // inferred from direct assay /// 5524 // ATP bindin…	---
218491_s_at	2.53	0.00183812	THYN1	thymocyte nuclear protein 1	13645	---	---	---
227008_at	2.53	0.00416408	HDDC3	HD domain containing 3	349979	---	3824 // catalytic activity // inferred from electronic annotation	---
202309_at	2.53	0.00487616	MTHFD1	methylenetetrahydrofolate dehydrogenase (NADP+ dependent) 1, methenyltetrahydrofolate cyclohydrolase, formyltetrahydrofolate synthetase	632340	105 // histidine biosynthesis // inferred from electronic annotation /// 6164 // purine nucleotide biosynthesis // inferred from electronic annotation /// 6730 // one-carbon compound metabolism // inferred from electronic annotation /// 8652 // amino acid biosynthesis // inferred from electronic annotation /// 9086 // methionine biosynthesis // inferred from electronic annotation /// 9396 // foli…	166 // nucleotide binding // inferred from electronic annotation /// 4329 // formate-tetrahydrofolate ligase activity // traceable author statement /// 4477 // methenyltetrahydrofolate cyclohydrolase activity // traceable author statement /// 4488 // methylenetetrahydrofolate dehydrogenase (NADP+) activity // inferred from electronic annotation /// 5524 // ATP binding // inferred from electronic …	One carbon pool by folate // KEGG /// Glyoxylate and dicarboxylate metabolism // KEGG /// One carbon pool by folate // KEGG /// Glyoxylate and dicarboxylate metabolism // KEGG /// One carbon pool by folate // KEGG /// Glyoxylate and dicarboxylate metabolism // KEGG /// One carbon pool by folate // KEGG
203359_s_at	2.53	0.0175905	MYCBP	c-myc binding protein	591506	6350 // transcription // inferred from electronic annotation /// 6355 // regulation of transcription, DNA-dependent // inferred from electronic annotation	3713 // transcription coactivator activity // not recorded /// 5515 // protein binding // inferred from physical interaction	Calcium_regulation_in_cardiac_cells // GenMAPP
238012_at	2.53	0.023131	DPP7	Dipeptidyl-peptidase 7	37916	6508 // proteolysis // inferred from electronic annotation	4177 // aminopeptidase activity // inferred from electronic annotation /// 4252 // serine-type endopeptidase activity // inferred from electronic annotation /// 5515 // protein binding // inferred from physical interaction /// 8236 // serine-type peptidase activity // inferred from electronic annotation /// 8233 // peptidase activity // inferred from electronic annotation /// 16787 // hydrolase a…	---
235349_at	2.53	0.0421821	FAM82A	family with sequence similarity 82, member A	591566	---	5488 // binding // inferred from electronic annotation	---
212510_at	2.52	0.00923642	GPD1L	glycerol-3-phosphate dehydrogenase 1-like	82432	5975 // carbohydrate metabolism // inferred from electronic annotation /// 6072 // glycerol-3-phosphate metabolism // inferred from electronic annotation /// 46168 // glycerol-3-phosphate catabolism // inferred from electronic annotation	4367 // glycerol-3-phosphate dehydrogenase (NAD+) activity // inferred from electronic annotation /// 16491 // oxidoreductase activity // inferred from electronic annotation /// 16614 // oxidoreductase activity, acting on CH-OH group of donors // inferred from electronic annotation /// 16616 // oxidoreductase activity, acting on the CH-OH group of donors, NAD or NADP as acceptor // inferred from …	---
228090_at	2.52	0.0263869	NMNAT3	nicotinamide nucleotide adenylyltransferase 3	208673	9058 // biosynthesis // inferred from electronic annotation /// 9435 // NAD biosynthesis // inferred from electronic annotation /// 19363 // pyridine nucleotide biosynthesis // inferred from electronic annotation	309 // nicotinamide-nucleotide adenylyltransferase activity // inferred from electronic annotation /// 16740 // transferase activity // inferred from electronic annotation /// 16779 // nucleotidyltransferase activity // inferred from electronic annotation	---
231952_at	2.52	0.0494622	FLJ25715	Hypothetical protein FLJ25715	368518	---	---	---
204824_at	2.51	0.0157206	ENDOG	endonuclease G	591905	6259 // DNA metabolism // not recorded	287 // magnesium ion binding // inferred from electronic annotation /// 3676 // nucleic acid binding // inferred from electronic annotation /// 3677 // DNA binding // not recorded /// 4519 // endonuclease activity // inferred from electronic annotation /// 16787 // hydrolase activity // inferred from electronic annotation /// 30145 // manganese ion binding // inferred from electronic annotation /…	---
240065_at	2.51	0.0496543	FAM81B	family with sequence similarity 81, member B	276287	---	---	---
217736_s_at	2.5	0.00167637	EIF2AK1	eukaryotic translation initiation factor 2-alpha kinase 1	520205	6950 // response to stress // inferred from expression pattern /// 9605 // response to external stimulus // inferred from expression pattern /// 45993 // negative regulation of translational initiation by iron // non-traceable author statement /// 46777 // protein amino acid autophosphorylation // inferred from sequence or structural similarity /// 46986 // negative regulation of hemoglobin biosy…	166 // nucleotide binding // inferred from electronic annotation /// 4694 // eukaryotic translation initiation factor 2alpha kinase activity // inferred from direct assay /// 5524 // ATP binding // inferred from electronic annotation /// 16740 // transferase activity // inferred from electronic annotation /// 20037 // heme binding // inferred from sequence or structural similarity /// 42803 // pr…	Translation_Factors // GenMAPP
221987_s_at	2.5	0.00974601	TSR1	TSR1, 20S rRNA accumulation, homolog (S. cerevisiae)	388170	---	---	---
225716_at	2.5	0.0352314	---	Full-length cDNA clone CS0DK008YI09 of HeLa cells Cot 25-normalized of Homo sapiens (human)	330495	---	---	---
224715_at	2.49	0.00276805	WDR34	WD repeat domain 34	495240	---	---	---
226020_s_at	2.49	0.0147914	DAB1 /// OMA1	disabled homolog 1 (Drosophila) /// OMA1 homolog, zinc metallopeptidase (S. cerevisiae)	477370	7399 // nervous system development // inferred from electronic annotation /// 30154 // cell differentiation // inferred from electronic annotation /// 6508 // proteolysis // inferred from electronic annotation /// 7275 // development // inferred from electronic annotation	4222 // metalloendopeptidase activity // inferred from electronic annotation /// 8270 // zinc ion binding // inferred from electronic annotation /// 8233 // peptidase activity // inferred from electronic annotation /// 8237 // metallopeptidase activity // inferred from electronic annotation /// 16787 // hydrolase activity // inferred from electronic annotation	---
210290_at	2.49	0.0351526	ZNF174	zinc finger protein 174	155204	122 // negative regulation of transcription from RNA polymerase II promoter // traceable author statement /// 6350 // transcription // inferred from electronic annotation /// 6355 // regulation of transcription, DNA-dependent // inferred from electronic annotation	3700 // transcription factor activity // traceable author statement /// 5515 // protein binding // traceable author statement /// 8270 // zinc ion binding // inferred from electronic annotation /// 46872 // metal ion binding // inferred from electronic annotation /// 3676 // nucleic acid binding // inferred from electronic annotation /// 3677 // DNA binding // inferred from electronic annotation …	---
203405_at	2.48	0.00167637	DSCR2	Down syndrome critical region gene 2	473838	---	---	---
205296_at	2.48	0.0202698	---	---	---	---	---	---
229091_s_at	2.48	0.0216684	CCNJ	cyclin J	596479	74 // regulation of progression through cell cycle // inferred from electronic annotation	---	---
202504_at	2.48	0.0355292	TRIM29	tripartite motif-containing 29	504115	6366 // transcription from RNA polymerase II promoter // traceable author statement	3700 // transcription factor activity // traceable author statement /// 5515 // protein binding // inferred from physical interaction /// 8270 // zinc ion binding // inferred from electronic annotation /// 46872 // metal ion binding // inferred from electronic annotation	---
213088_s_at	2.47	0.000663895	DNAJC9	DnaJ (Hsp40) homolog, subfamily C, member 9	---	6457 // protein folding // inferred from electronic annotation	31072 // heat shock protein binding // inferred from electronic annotation /// 51082 // unfolded protein binding // inferred from electronic annotation	---
204159_at	2.47	0.0314946	CDKN2C	cyclin-dependent kinase inhibitor 2C (p18, inhibits CDK4)	525324	7049 // cell cycle // inferred from electronic annotation /// 7050 // cell cycle arrest // traceable author statement /// 8285 // negative regulation of cell proliferation // traceable author statement	4861 // cyclin-dependent protein kinase inhibitor activity // traceable author statement /// 16301 // kinase activity // inferred from electronic annotation	G1_to_S_cell_cycle_Reactome // GenMAPP
212918_at	2.46	0.00434165	RECQL	RecQ protein-like (DNA helicase Q1-like)	235069	6281 // DNA repair // traceable author statement /// 6310 // DNA recombination // inferred from electronic annotation	166 // nucleotide binding // inferred from electronic annotation /// 3677 // DNA binding // inferred from electronic annotation /// 4003 // ATP-dependent DNA helicase activity // traceable author statement /// 5515 // protein binding // inferred from physical interaction /// 5524 // ATP binding // inferred from electronic annotation /// 16787 // hydrolase activity // inferred from electronic anno…	---
208369_s_at	2.46	0.00468003	GCDH	glutaryl-Coenzyme A dehydrogenase	532699	6118 // electron transport // inferred from electronic annotation /// 8152 // metabolism // inferred from electronic annotation	4361 // glutaryl-CoA dehydrogenase activity // traceable author statement /// 50660 // FAD binding // inferred from electronic annotation /// 3995 // acyl-CoA dehydrogenase activity // inferred from electronic annotation /// 4361 // glutaryl-CoA dehydrogenase activity // inferred from electronic annotation /// 16491 // oxidoreductase activity // inferred from electronic annotation /// 16627 // ox…	Fatty acid metabolism // KEGG /// Lysine degradation // KEGG /// Tryptophan metabolism // KEGG /// Benzoate degradation via CoA ligation // KEGG
204675_at	2.46	0.00607742	SRD5A1	steroid-5-alpha-reductase, alpha polypeptide 1 (3-oxo-5 alpha-steroid delta 4-dehydrogenase alpha 1)	552	7267 // cell-cell signaling // not recorded /// 7530 // sex determination // non-traceable author statement /// 7548 // sex differentiation // inferred from electronic annotation /// 30154 // cell differentiation // inferred from electronic annotation	3865 // 3-oxo-5-alpha-steroid 4-dehydrogenase activity // inferred from electronic annotation /// 9055 // electron carrier activity // traceable author statement /// 16491 // oxidoreductase activity // inferred from electronic annotation	Bile acid biosynthesis // KEGG /// Androgen and estrogen metabolism // KEGG
231968_at	2.46	0.0161788	---	CDNA: FLJ21763 fis, clone COLF6967	598715	---	---	---
203022_at	2.46	0.0182561	RNASEH2A	ribonuclease H2, subunit A	532851	6260 // DNA replication // traceable author statement /// 6401 // RNA catabolism // traceable author statement /// 16070 // RNA metabolism // inferred from electronic annotation	3723 // RNA binding // inferred from electronic annotation /// 4519 // endonuclease activity // inferred from electronic annotation /// 4523 // ribonuclease H activity // inferred from electronic annotation /// 4540 // ribonuclease activity // traceable author statement /// 16787 // hydrolase activity // inferred from electronic annotation /// 46872 // metal ion binding // inferred from electroni…	---
213189_at	2.46	0.0226195	MINA	MYC induced nuclear antigen	476970	---	---	---
201562_s_at	2.45	0.00141834	SORD	sorbitol dehydrogenase	878	6060 // sorbitol metabolism // not recorded /// 7601 // visual perception // traceable author statement	3939 // L-iditol 2-dehydrogenase activity // inferred from electronic annotation /// 8270 // zinc ion binding // inferred from electronic annotation /// 16491 // oxidoreductase activity // inferred from electronic annotation /// 46872 // metal ion binding // inferred from electronic annotation	Fructose and mannose metabolism // KEGG
31874_at	2.45	0.00446512	GAS2L1	growth arrest-specific 2 like 1	322852	7050 // cell cycle arrest // inferred from electronic annotation	---	---
204125_at	2.45	0.00461662	NDUFAF1	NADH dehydrogenase (ubiquinone) 1 alpha subcomplex, assembly factor 1	106529	6120 // mitochondrial electron transport, NADH to ubiquinone // non-traceable author statement /// 6457 // protein folding // inferred from electronic annotation /// 6461 // protein complex assembly // non-traceable author statement	51082 // unfolded protein binding // non-traceable author statement /// 51082 // unfolded protein binding // inferred from electronic annotation	---
212922_s_at	2.44	0.00173053	SMYD2	SET and MYND domain containing 2	66170	---	5488 // binding // inferred from electronic annotation /// 8270 // zinc ion binding // inferred from electronic annotation /// 46872 // metal ion binding // inferred from electronic annotation	---
223229_at	2.44	0.0193997	UBE2T	ubiquitin-conjugating enzyme E2T (putative)	5199	6512 // ubiquitin cycle // inferred from electronic annotation /// 6464 // protein modification // inferred from electronic annotation	4842 // ubiquitin-protein ligase activity // inferred from electronic annotation /// 16874 // ligase activity // inferred from electronic annotation	---
223386_at	2.43	0.00176995	FAM118B	family with sequence similarity 118, member B	276315	6092 // main pathways of carbohydrate metabolism // inferred from electronic annotation /// 6099 // tricarboxylic acid cycle // inferred from electronic annotation	4108 // citrate (Si)-synthase activity // inferred from electronic annotation /// 16740 // transferase activity // inferred from electronic annotation /// 46912 // transferase activity, transferring acyl groups, acyl groups converted into alkyl on transfer // inferred from electronic annotation /// 4108 // citrate (Si)-synthase activity // traceable author statement	Krebs-TCA_Cycle // GenMAPP
219553_at	2.43	0.00282697	NME7	non-metastatic cells 7, protein expressed in (nucleoside-diphosphate kinase)	---	6183 // GTP biosynthesis // inferred from electronic annotation /// 6228 // UTP biosynthesis // inferred from electronic annotation /// 6241 // CTP biosynthesis // inferred from electronic annotation /// 9117 // nucleotide metabolism // inferred from electronic annotation	166 // nucleotide binding // inferred from electronic annotation /// 287 // magnesium ion binding // inferred from electronic annotation /// 4550 // nucleoside diphosphate kinase activity // inferred from electronic annotation /// 5524 // ATP binding // inferred from electronic annotation /// 16301 // kinase activity // inferred from electronic annotation /// 16740 // transferase activity // infe…	Calcium_regulation_in_cardiac_cells // GenMAPP
226264_at	2.43	0.0036097	SUSD1	sushi domain containing 1	494827	---	5509 // calcium ion binding // inferred from electronic annotation	---
204033_at	2.43	0.00605156	TRIP13	thyroid hormone receptor interactor 13	436187	6366 // transcription from RNA polymerase II promoter // traceable author statement	166 // nucleotide binding // inferred from electronic annotation /// 3712 // transcription cofactor activity // traceable author statement /// 5524 // ATP binding // inferred from electronic annotation /// 17111 // nucleoside-triphosphatase activity // inferred from electronic annotation	---
230391_at	2.43	0.00670534	---	---	---	---	---	---
219938_s_at	2.43	0.0118898	PSTPIP2	proline-serine-threonine phosphatase interacting protein 2	567384	---	---	---
226416_at	2.43	0.014088	THEX1	three prime histone mRNA exonuclease 1	20000	---	287 // magnesium ion binding // inferred from electronic annotation /// 3677 // DNA binding // inferred from electronic annotation /// 3723 // RNA binding // inferred from electronic annotation /// 8408 // 3'-5' exonuclease activity // inferred from direct assay /// 16787 // hydrolase activity // inferred from electronic annotation /// 4518 // nuclease activity // inferred from electronic annotat…	---
205190_at	2.43	0.037574	PLS1	plastin 1 (I isoform)	203637	---	5200 // structural constituent of cytoskeleton // traceable author statement /// 5509 // calcium ion binding // inferred from electronic annotation /// 51015 // actin filament binding // traceable author statement /// 3779 // actin binding // inferred from electronic annotation	---
202395_at	2.42	0.000894816	NSF	N-ethylmaleimide-sensitive factor	431279	15031 // protein transport // inferred from electronic annotation /// 6810 // transport // inferred from electronic annotation /// 6508 // proteolysis // inferred from electronic annotation	166 // nucleotide binding // inferred from electronic annotation /// 287 // magnesium ion binding // inferred from electronic annotation /// 5524 // ATP binding // inferred from electronic annotation /// 16787 // hydrolase activity // inferred from electronic annotation /// 17111 // nucleoside-triphosphatase activity // inferred from electronic annotation /// 46872 // metal ion binding // inferre…	---
208857_s_at	2.42	0.00393174	PCMT1	protein-L-isoaspartate (D-aspartate) O-methyltransferase	279257	6464 // protein modification // inferred from electronic annotation /// 6479 // protein amino acid methylation // traceable author statement	4719 // protein-L-isoaspartate (D-aspartate) O-methyltransferase activity // inferred from electronic annotation /// 8168 // methyltransferase activity // inferred from electronic annotation /// 16740 // transferase activity // inferred from electronic annotation	---
201487_at	2.42	0.00903878	CTSC	cathepsin C	128065	6508 // proteolysis // inferred from electronic annotation /// 6955 // immune response // traceable author statement /// 6508 // proteolysis // not recorded	4197 // cysteine-type endopeptidase activity // inferred from electronic annotation /// 4214 // dipeptidyl-peptidase I activity // inferred from electronic annotation /// 31404 // chloride ion binding // inferred from electronic annotation /// 8233 // peptidase activity // inferred from electronic annotation /// 8234 // cysteine-type peptidase activity // inferred from electronic annotation /// 1…	---
218350_s_at	2.42	0.0137081	GMNN	geminin, DNA replication inhibitor	234896	7049 // cell cycle // inferred from electronic annotation /// 8156 // negative regulation of DNA replication // inferred from direct assay /// 45786 // negative regulation of progression through cell cycle // inferred from direct assay /// 74 // regulation of progression through cell cycle // inferred from electronic annotation /// 8156 // negative regulation of DNA replication // inferred from e…	5515 // protein binding // inferred from physical interaction	DNA_replication_Reactome // GenMAPP
224512_s_at	2.42	0.022328	LSMD1	LSM domain containing 1 /// LSM domain containing 1	565094	16071 // mRNA metabolism // inferred from electronic annotation	---	---
237336_at	2.42	0.0484088	ADD2	adducin 2 (beta)	188528	---	3779 // actin binding // traceable author statement /// 5516 // calmodulin binding // inferred from electronic annotation	---
208875_s_at	2.41	0.0010895	PAK2	p21 (CDKN1A)-activated kinase 2	518530	6468 // protein amino acid phosphorylation // inferred from electronic annotation /// 6468 // protein amino acid phosphorylation // traceable author statement /// 6469 // negative regulation of protein kinase activity // traceable author statement /// 7165 // signal transduction // traceable author statement	166 // nucleotide binding // inferred from electronic annotation /// 4674 // protein serine/threonine kinase activity // inferred from electronic annotation /// 5515 // protein binding // inferred from physical interaction /// 5524 // ATP binding // inferred from electronic annotation /// 16740 // transferase activity // inferred from electronic annotation /// 3824 // catalytic activity // inferr…	Integrin-mediated_cell_adhesion_KEGG // GenMAPP /// Integrin-mediated_cell_adhesion_KEGG // GenMAPP
218156_s_at	2.41	0.00181569	TSR1	TSR1, 20S rRNA accumulation, homolog (S. cerevisiae)	388170	---	---	---
213947_s_at	2.41	0.00322142	NUP210	nucleoporin 210kDa	475525	6397 // mRNA processing // inferred from electronic annotation /// 6406 // mRNA export from nucleus // inferred from electronic annotation /// 6605 // protein targeting // inferred from electronic annotation /// 15031 // protein transport // inferred from electronic annotation /// 6810 // transport // inferred from electronic annotation	5515 // protein binding // inferred from physical interaction	---
235208_at	2.41	0.0117696	CCDC112	coiled-coil domain containing 112	436121	---	3677 // DNA binding // inferred from electronic annotation	---
226936_at	2.41	0.0200007	C6orf173	chromosome 6 open reading frame 173	486401	---	3677 // DNA binding // inferred from electronic annotation /// 3887 // DNA-directed DNA polymerase activity // inferred from electronic annotation /// 16740 // transferase activity // inferred from electronic annotation /// 16779 // nucleotidyltransferase activity // inferred from electronic annotation	---
204504_s_at	2.4	0.00103683	HIRIP3	HIRA interacting protein 3	592046	6333 // chromatin assembly or disassembly // traceable author statement	---	---
229304_s_at	2.4	0.00394611	MLF1IP	MLF1 interacting protein	575032	6350 // transcription // inferred from electronic annotation /// 6355 // regulation of transcription, DNA-dependent // inferred from electronic annotation	---	---
223743_s_at	2.4	0.0132173	MRPL4	mitochondrial ribosomal protein L4	279652	6412 // protein biosynthesis // inferred from electronic annotation	3735 // structural constituent of ribosome // inferred from electronic annotation	---
217520_x_at	2.39	0.00887252	LOC283683 /// LOC646278	hypothetical protein LOC283683 /// similar to programmed cell death 6 interacting protein	597835	---	---	---
204767_s_at	2.39	0.0140184	FEN1	flap structure-specific endonuclease 1	409065	6260 // DNA replication // non-traceable author statement /// 6302 // double-strand break repair // traceable author statement /// 9650 // UV protection // traceable author statement /// 48015 // phosphoinositide-mediated signaling // non-traceable author statement /// 6281 // DNA repair // inferred from electronic annotation /// 6260 // DNA replication // traceable author statement /// 6281 // D…	3684 // damaged DNA binding // traceable author statement /// 3690 // double-stranded DNA binding // traceable author statement /// 4519 // endonuclease activity // traceable author statement /// 4523 // ribonuclease H activity // inferred from direct assay /// 5515 // protein binding // inferred from physical interaction /// 8309 // double-stranded DNA specific exodeoxyribonuclease activity // t…	---
203186_s_at	2.39	0.0191559	S100A4	S100 calcium binding protein A4 (calcium protein, calvasculin, metastasin, murine placental homolog)	557609	---	5509 // calcium ion binding // traceable author statement /// 5509 // calcium ion binding // inferred from electronic annotation /// 8270 // zinc ion binding // inferred from electronic annotation /// 46872 // metal ion binding // inferred from electronic annotation /// 5509 // calcium ion binding // not recorded	---
219332_at	2.39	0.0219023	MICAL-L2	MICAL-like 2	376617	---	8270 // zinc ion binding // inferred from electronic annotation /// 46872 // metal ion binding // inferred from electronic annotation	---
220643_s_at	2.39	0.0291576	FAIM	Fas apoptotic inhibitory molecule	173438	6915 // apoptosis // inferred from electronic annotation /// 43066 // negative regulation of apoptosis // inferred from electronic annotation	---	---
200697_at	2.38	0.00153986	HK1	hexokinase 1	370365	6096 // glycolysis // traceable author statement /// 6096 // glycolysis // inferred from electronic annotation	166 // nucleotide binding // inferred from electronic annotation /// 4396 // hexokinase activity // traceable author statement /// 5524 // ATP binding // inferred from electronic annotation /// 16301 // kinase activity // inferred from electronic annotation /// 16740 // transferase activity // inferred from electronic annotation /// 3824 // catalytic activity // inferred from electronic annotatio…	Glycolysis_and_Gluconeogenesis // GenMAPP /// Glycolysis_and_Gluconeogenesis // GenMAPP /// Glycolysis_and_Gluconeogenesis // GenMAPP /// Glycolysis / Gluconeogenesis // KEGG /// Fructose and mannose metabolism // KEGG /// Galactose metabolism // KEGG /// Starch and sucrose metabolism // KEGG /// Streptomycin biosynthesis // KEGG /// Aminosugars metabolism // KEGG
223106_at	2.38	0.00943755	TMEM14C	transmembrane protein 14C	519557	---	---	---
208694_at	2.38	0.0215282	PRKDC	protein kinase, DNA-activated, catalytic polypeptide	491682	6303 // double-strand break repair via nonhomologous end joining // inferred from electronic annotation /// 6310 // DNA recombination // inferred from electronic annotation /// 6464 // protein modification // traceable author statement /// 6281 // DNA repair // inferred from electronic annotation /// 6974 // response to DNA damage stimulus // inferred from electronic annotation /// 6302 // double…	3677 // DNA binding // inferred from electronic annotation /// 4677 // DNA-dependent protein kinase activity // inferred from electronic annotation /// 5515 // protein binding // inferred from physical interaction /// 5524 // ATP binding // inferred from electronic annotation /// 16740 // transferase activity // inferred from electronic annotation /// 4674 // protein serine/threonine kinase activ…	Cell_cycle_KEGG // GenMAPP
224840_at	2.37	0.00122294	FKBP5	FK506 binding protein 5	407190	6457 // protein folding // traceable author statement /// 6457 // protein folding // inferred from electronic annotation	3755 // peptidyl-prolyl cis-trans isomerase activity // inferred from electronic annotation /// 5528 // FK506 binding // traceable author statement /// 16853 // isomerase activity // inferred from electronic annotation /// 51082 // unfolded protein binding // inferred from electronic annotation /// 5515 // protein binding // inferred from physical interaction /// 5488 // binding // inferred from …	Calcium signaling pathway // KEGG
218488_at	2.37	0.00541781	EIF2B3	eukaryotic translation initiation factor 2B, subunit 3 gamma, 58kDa	533549	6412 // protein biosynthesis // inferred from electronic annotation /// 6413 // translational initiation // traceable author statement /// 9058 // biosynthesis // inferred from electronic annotation /// 9615 // response to virus // traceable author statement	3743 // translation initiation factor activity // inferred from electronic annotation /// 3743 // translation initiation factor activity // traceable author statement /// 16779 // nucleotidyltransferase activity // inferred from electronic annotation /// 8135 // translation factor activity, nucleic acid binding // traceable author statement	Translation_Factors // GenMAPP /// Translation_Factors // GenMAPP
225297_at	2.37	0.00654129	CCDC5	coiled-coil domain containing 5 (spindle associated)	436617	7049 // cell cycle // inferred from electronic annotation /// 7067 // mitosis // inferred from electronic annotation /// 51301 // cell division // inferred from electronic annotation	---	---
204466_s_at	2.37	0.00992389	SNCA	synuclein, alpha (non A4 component of amyloid precursor) /// synuclein, alpha (non A4 component of amyloid precursor)	271771	6916 // anti-apoptosis // traceable author statement /// 7417 // central nervous system development // traceable author statement	5515 // protein binding // inferred from physical interaction	---
201756_at	2.37	0.0109009	RPA2	replication protein A2, 32kDa	79411	6260 // DNA replication // inferred from electronic annotation /// 6261 // DNA-dependent DNA replication // traceable author statement	3676 // nucleic acid binding // inferred from electronic annotation /// 3697 // single-stranded DNA binding // traceable author statement /// 3887 // DNA-directed DNA polymerase activity // inferred from electronic annotation /// 5515 // protein binding // inferred from physical interaction /// 16740 // transferase activity // inferred from electronic annotation	DNA_replication_Reactome // GenMAPP /// G1_to_S_cell_cycle_Reactome // GenMAPP
224812_at	2.37	0.0166135	HIBADH	3-hydroxyisobutyrate dehydrogenase	406758	6098 // pentose-phosphate shunt // inferred from electronic annotation /// 6573 // valine metabolism // inferred from electronic annotation /// 6573 // valine metabolism // non-traceable author statement	4616 // phosphogluconate dehydrogenase (decarboxylating) activity // inferred from electronic annotation /// 8442 // 3-hydroxyisobutyrate dehydrogenase activity // inferred from electronic annotation /// 8442 // 3-hydroxyisobutyrate dehydrogenase activity // non-traceable author statement /// 16491 // oxidoreductase activity // inferred from electronic annotation /// 51287 // NAD binding // infer…	Valine, leucine and isoleucine degradation // KEGG
204116_at	2.37	0.0308364	IL2RG	interleukin 2 receptor, gamma (severe combined immunodeficiency)	84	6955 // immune response // traceable author statement /// 7165 // signal transduction // non-traceable author statement	4872 // receptor activity // inferred from electronic annotation /// 4896 // hematopoietin/interferon-class (D200-domain) cytokine receptor activity // inferred from electronic annotation /// 4911 // interleukin-2 receptor activity // traceable author statement /// 4913 // interleukin-4 receptor activity // traceable author statement /// 4917 // interleukin-7 receptor activity // traceable author…	Inflammatory_Response_Pathway // GenMAPP
202587_s_at	2.36	0.000884344	AK1	adenylate kinase 1	175473	6139 // nucleobase, nucleoside, nucleotide and nucleic acid metabolism // inferred from electronic annotation /// 46034 // ATP metabolism // inferred from electronic annotation	166 // nucleotide binding // inferred from electronic annotation /// 4017 // adenylate kinase activity // inferred from electronic annotation /// 4017 // adenylate kinase activity // traceable author statement /// 5524 // ATP binding // inferred from electronic annotation /// 16301 // kinase activity // inferred from electronic annotation /// 16740 // transferase activity // inferred from electro…	Purine metabolism // KEGG
226636_at	2.36	0.00150101	PLD1	phospholipase D1, phosphatidylcholine-specific	382865	6644 // phospholipid metabolism // not recorded /// 6935 // chemotaxis // traceable author statement /// 7265 // Ras protein signal transduction // traceable author statement /// 8152 // metabolism // inferred from electronic annotation /// 16042 // lipid catabolism // inferred from electronic annotation /// 7242 // intracellular signaling cascade // inferred from electronic annotation /// 7264 /…	4630 // phospholipase D activity // traceable author statement /// 5515 // protein binding // inferred from electronic annotation /// 16787 // hydrolase activity // inferred from electronic annotation /// 35091 // phosphoinositide binding // inferred from electronic annotation /// 3824 // catalytic activity // inferred from electronic annotation /// 4630 // phospholipase D activity // inferred fr…	---
223154_at	2.36	0.00877057	MRPL1	mitochondrial ribosomal protein L1	532019	6412 // protein biosynthesis // inferred from electronic annotation	3723 // RNA binding // inferred from electronic annotation /// 3735 // structural constituent of ribosome // inferred from electronic annotation	---
218622_at	2.36	0.0124266	NUP37	nucleoporin 37kDa	444276	15031 // protein transport // inferred from electronic annotation /// 6810 // transport // inferred from electronic annotation	---	---
218111_s_at	2.36	0.0142492	CMAS	cytidine monophosphate N-acetylneuraminic acid synthetase	311346	9103 // lipopolysaccharide biosynthesis // inferred from electronic annotation	8781 // N-acylneuraminate cytidylyltransferase activity // inferred from electronic annotation /// 16740 // transferase activity // inferred from electronic annotation /// 16779 // nucleotidyltransferase activity // inferred from electronic annotation	Aminosugars metabolism // KEGG
224608_s_at	2.35	0.00805442	VPS25	vacuolar protein sorting 25 homolog (S. cerevisiae)	500165	6350 // transcription // inferred from electronic annotation /// 6355 // regulation of transcription, DNA-dependent // inferred from electronic annotation /// 15031 // protein transport // inferred from electronic annotation /// 6810 // transport // inferred from electronic annotation	---	---
234672_s_at	2.35	0.014088	TMEM48	transmembrane protein 48	476525	6397 // mRNA processing // inferred from electronic annotation /// 6406 // mRNA export from nucleus // inferred from electronic annotation /// 6605 // protein targeting // inferred from electronic annotation /// 15031 // protein transport // non-traceable author statement /// 31081 // nuclear pore distribution // inferred from mutant phenotype /// 51292 // nuclear pore complex assembly // inferre…	17056 // structural constituent of nuclear pore // inferred from mutant phenotype	---
202589_at	2.35	0.0282035	TYMS	thymidylate synthetase	592338	6139 // nucleobase, nucleoside, nucleotide and nucleic acid metabolism // traceable author statement /// 6231 // dTMP biosynthesis // inferred from electronic annotation /// 6260 // DNA replication // non-traceable author statement /// 6281 // DNA repair // non-traceable author statement /// 9157 // deoxyribonucleoside monophosphate biosynthesis // traceable author statement /// 9165 // nucleotid…	4799 // thymidylate synthase activity // inferred from electronic annotation /// 8168 // methyltransferase activity // inferred from electronic annotation /// 16740 // transferase activity // inferred from electronic annotation	Pyrimidine metabolism // KEGG /// One carbon pool by folate // KEGG
203658_at	2.34	0.00188392	SLC25A20	solute carrier family 25 (carnitine/acylcarnitine translocase), member 20	13845	6810 // transport // inferred from electronic annotation	5319 // lipid transporter activity // not recorded /// 5488 // binding // inferred from electronic annotation /// 5215 // transporter activity // inferred from electronic annotation	Fatty_Acid_Degradation // GenMAPP /// Mitochondrial_fatty_acid_betaoxidation // GenMAPP
227157_at	2.34	0.00514114	CCDC111	coiled-coil domain containing 111	---	---	---	---
228970_at	2.34	0.0102701	ZBTB8OS	zinc finger and BTB domain containing 8 opposite strand	585398	---	---	---
212590_at	2.34	0.0109577	RRAS2	related RAS viral (r-ras) oncogene homolog 2	502004	7264 // small GTPase mediated signal transduction // inferred from electronic annotation	166 // nucleotide binding // inferred from electronic annotation /// 5515 // protein binding // inferred from physical interaction /// 5525 // GTP binding // inferred from electronic annotation	---
224469_s_at	2.34	0.0243067	C14orf151	chromosome 14 open reading frame 151 /// chromosome 14 open reading frame 151	317821	16043 // cell organization and biogenesis // inferred from electronic annotation /// 30036 // actin cytoskeleton organization and biogenesis // inferred from electronic annotation	3779 // actin binding // inferred from electronic annotation /// 5488 // binding // inferred from electronic annotation /// 17048 // Rho GTPase binding // inferred from electronic annotation	---
1568781_at	2.34	0.0262961	UROS	Uroporphyrinogen III synthase (congenital erythropoietic porphyria)	501376	6780 // uroporphyrinogen III biosynthesis // traceable author statement /// 6783 // heme biosynthesis // inferred from electronic annotation /// 6779 // porphyrin biosynthesis // inferred from electronic annotation	4852 // uroporphyrinogen-III synthase activity // inferred from electronic annotation /// 16829 // lyase activity // inferred from electronic annotation	Heme_Biosynthesis // GenMAPP /// Heme_Biosynthesis // GenMAPP /// Porphyrin and chlorophyll metabolism // KEGG
208636_at	2.33	0.00416814	ACTN1	actinin, alpha 1	509765	42981 // regulation of apoptosis // non-traceable author statement /// 48041 // focal adhesion formation // inferred from mutant phenotype /// 51271 // negative regulation of cell motility // inferred from mutant phenotype	3779 // actin binding // inferred from electronic annotation /// 5178 // integrin binding // inferred from direct assay /// 5509 // calcium ion binding // inferred from electronic annotation /// 5515 // protein binding // inferred from physical interaction /// 17166 // vinculin binding // inferred from physical interaction	---
230766_at	2.33	0.00455462	---	Transcribed locus, weakly similar to NP_062553.1 hypothetical protein FLJ11267 [Homo sapiens]	113631	---	---	---
206752_s_at	2.33	0.00681227	DFFB	DNA fragmentation factor, 40kDa, beta polypeptide (caspase-activated DNase)	133089	6309 // DNA fragmentation during apoptosis // inferred from direct assay /// 6915 // apoptosis // inferred from electronic annotation /// 7242 // intracellular signaling cascade // traceable author statement /// 6309 // DNA fragmentation during apoptosis // traceable author statement	4518 // nuclease activity // inferred from electronic annotation /// 4537 // caspase-activated deoxyribonuclease activity // traceable author statement /// 5515 // protein binding // inferred from electronic annotation /// 16787 // hydrolase activity // inferred from electronic annotation	Apoptosis // GenMAPP /// Apoptosis_KEGG // GenMAPP /// Apoptosis // GenMAPP /// Apoptosis // GenMAPP /// Apoptosis // GenMAPP /// Apoptosis_KEGG // GenMAPP /// Apoptosis_KEGG // GenMAPP /// Apoptosis_KEGG // GenMAPP
207357_s_at	2.33	0.0228574	GALNT10	UDP-N-acetyl-alpha-D-galactosamine:polypeptide N-acetylgalactosaminyltransferase 10 (GalNAc-T10)	432818	---	4653 // polypeptide N-acetylgalactosaminyltransferase activity // inferred from electronic annotation /// 5509 // calcium ion binding // inferred from electronic annotation /// 5529 // sugar binding // inferred from electronic annotation /// 16757 // transferase activity, transferring glycosyl groups // inferred from electronic annotation /// 30145 // manganese ion binding // inferred from electr…	O-Glycan biosynthesis // KEGG /// Glycan structures - biosynthesis 1 // KEGG
201897_s_at	2.33	0.0346144	CKS1B	CDC28 protein kinase regulatory subunit 1B	374378	7049 // cell cycle // inferred from electronic annotation /// 51301 // cell division // inferred from electronic annotation	5515 // protein binding // inferred from physical interaction /// 16301 // kinase activity // inferred from electronic annotation /// 16538 // cyclin-dependent protein kinase regulator activity // inferred from electronic annotation	---
206950_at	2.32	0.00636712	SCN9A	sodium channel, voltage-gated, type IX, alpha	2319	6811 // ion transport // inferred from electronic annotation /// 6814 // sodium ion transport // traceable author statement /// 6810 // transport // inferred from electronic annotation /// 6814 // sodium ion transport // inferred from electronic annotation	5248 // voltage-gated sodium channel activity // traceable author statement /// 5509 // calcium ion binding // inferred from electronic annotation /// 31402 // sodium ion binding // inferred from electronic annotation /// 5216 // ion channel activity // inferred from electronic annotation /// 5244 // voltage-gated ion channel activity // inferred from electronic annotation /// 5248 // voltage-gat…	---
238601_at	2.32	0.0173603	---	Transcribed locus	603954	---	---	---
225441_x_at	2.32	0.0252523	LSMD1	LSM domain containing 1	565094	16071 // mRNA metabolism // inferred from electronic annotation	---	---
226161_at	2.32	0.0255835	SLC30A6	solute carrier family 30 (zinc transporter), member 6	23248	6812 // cation transport // inferred from electronic annotation	8324 // cation transporter activity // inferred from electronic annotation	---
215299_x_at	2.31	0.00161026	SULT1A1	sulfotransferase family, cytosolic, 1A, phenol-preferring, member 1	567342	6584 // catecholamine metabolism // inferred from electronic annotation /// 6629 // lipid metabolism // inferred from electronic annotation /// 8202 // steroid metabolism // inferred from electronic annotation /// 9308 // amine metabolism // traceable author statement	4062 // aryl sulfotransferase activity // inferred from electronic annotation /// 8146 // sulfotransferase activity // inferred from electronic annotation /// 16740 // transferase activity // inferred from electronic annotation /// 8146 // sulfotransferase activity // traceable author statement	---
228410_at	2.31	0.00234976	GAB3	GRB2-associated binding protein 3	496982	---	---	---
218632_at	2.31	0.00450118	HECTD3	HECT domain containing 3	525084	6512 // ubiquitin cycle // inferred from electronic annotation /// 30071 // regulation of mitotic metaphase/anaphase transition // inferred from electronic annotation /// 6464 // protein modification // inferred from electronic annotation	4842 // ubiquitin-protein ligase activity // inferred from electronic annotation /// 5515 // protein binding // inferred from electronic annotation /// 16874 // ligase activity // inferred from electronic annotation	---
225173_at	2.31	0.00487616	ARHGAP18	Rho GTPase activating protein 18	486458	7165 // signal transduction // inferred from electronic annotation	5096 // GTPase activator activity // inferred from electronic annotation /// 5515 // protein binding // inferred from physical interaction	---
242963_at	2.31	0.00974601	MGC26963	hypothetical protein MGC26963	537144	6629 // lipid metabolism // inferred from electronic annotation /// 6665 // sphingolipid metabolism // inferred from electronic annotation /// 6686 // sphingomyelin biosynthesis // inferred from direct assay	16301 // kinase activity // inferred from electronic annotation /// 16740 // transferase activity // inferred from electronic annotation /// 47493 // ceramide cholinephosphotransferase activity // inferred from direct assay	---
218512_at	2.31	0.0137571	WDR12	WD repeat domain 12	73291	---	---	---
1558508_a_at	2.31	0.0189241	C1orf53	chromosome 1 open reading frame 53	61329	---	---	---
213523_at	2.3	0.0010766	CCNE1	cyclin E1	244723	74 // regulation of progression through cell cycle // inferred from electronic annotation /// 82 // G1/S transition of mitotic cell cycle // non-traceable author statement /// 7049 // cell cycle // inferred from electronic annotation /// 30521 // androgen receptor signaling pathway // non-traceable author statement /// 45893 // positive regulation of transcription, DNA-dependent // non-traceable …	3713 // transcription coactivator activity // non-traceable author statement /// 5515 // protein binding // inferred from physical interaction /// 50681 // androgen receptor binding // non-traceable author statement	Cell_cycle_KEGG // GenMAPP /// G1_to_S_cell_cycle_Reactome // GenMAPP
223917_s_at	2.3	0.00400201	SLC39A3	solute carrier family 39 (zinc transporter), member 3	515046	30001 // metal ion transport // inferred from electronic annotation	46873 // metal ion transporter activity // inferred from electronic annotation	---
200802_at	2.3	0.00458883	SARS	seryl-tRNA synthetase	531176	6412 // protein biosynthesis // traceable author statement /// 6434 // seryl-tRNA aminoacylation // inferred from electronic annotation /// 8033 // tRNA processing // traceable author statement /// 6412 // protein biosynthesis // inferred from electronic annotation /// 6418 // tRNA aminoacylation for protein translation // inferred from electronic annotation	166 // nucleotide binding // inferred from electronic annotation /// 3723 // RNA binding // traceable author statement /// 4828 // serine-tRNA ligase activity // inferred from electronic annotation /// 4828 // serine-tRNA ligase activity // traceable author statement /// 5524 // ATP binding // inferred from electronic annotation /// 16874 // ligase activity // inferred from electronic annotation …	Glycine, serine and threonine metabolism // KEGG /// Aminoacyl-tRNA biosynthesis // KEGG
209871_s_at	2.3	0.00490787	APBA2	amyloid beta (A4) precursor protein-binding, family A, member 2 (X11-like)	525718	7399 // nervous system development // traceable author statement /// 15031 // protein transport // inferred from electronic annotation /// 6810 // transport // inferred from electronic annotation	5515 // protein binding // inferred from physical interaction /// 5515 // protein binding // inferred from electronic annotation /// 5515 // protein binding // traceable author statement	---
225604_s_at	2.3	0.0092523	C9orf19	chromosome 9 open reading frame 19	493819	---	---	---
209482_at	2.3	0.0115234	POP7	processing of precursor 7, ribonuclease P subunit (S. cerevisiae)	416994	8033 // tRNA processing // inferred from electronic annotation	3676 // nucleic acid binding // inferred from electronic annotation /// 4526 // ribonuclease P activity // traceable author statement /// 5515 // protein binding // inferred from physical interaction /// 16787 // hydrolase activity // inferred from electronic annotation /// 4526 // ribonuclease P activity // inferred from electronic annotation	---
224632_at	2.3	0.0175762	GPATC4	G patch domain containing 4	193832	---	3676 // nucleic acid binding // inferred from electronic annotation	---
217735_s_at	2.3	0.0215993	EIF2AK1	eukaryotic translation initiation factor 2-alpha kinase 1	520205	6950 // response to stress // inferred from expression pattern /// 9605 // response to external stimulus // inferred from expression pattern /// 45993 // negative regulation of translational initiation by iron // non-traceable author statement /// 46777 // protein amino acid autophosphorylation // inferred from sequence or structural similarity /// 46986 // negative regulation of hemoglobin biosy…	166 // nucleotide binding // inferred from electronic annotation /// 4694 // eukaryotic translation initiation factor 2alpha kinase activity // inferred from direct assay /// 5524 // ATP binding // inferred from electronic annotation /// 16740 // transferase activity // inferred from electronic annotation /// 20037 // heme binding // inferred from sequence or structural similarity /// 42803 // pr…	Translation_Factors // GenMAPP
202532_s_at	2.3	0.049974	DHFR /// LOC643509	dihydrofolate reductase /// similar to Dihydrofolate reductase	592364	6545 // glycine biosynthesis // non-traceable author statement /// 6730 // one-carbon compound metabolism // inferred from electronic annotation /// 9165 // nucleotide biosynthesis // non-traceable author statement /// 6545 // glycine biosynthesis // inferred from electronic annotation /// 9165 // nucleotide biosynthesis // inferred from electronic annotation	4146 // dihydrofolate reductase activity // non-traceable author statement /// 16491 // oxidoreductase activity // inferred from electronic annotation /// 50661 // NADP binding // inferred from electronic annotation /// 4146 // dihydrofolate reductase activity // inferred from electronic annotation	Nucleotide_Metabolism // GenMAPP /// One carbon pool by folate // KEGG /// Folate biosynthesis // KEGG
209366_x_at	2.29	0.00786024	CYB5A	cytochrome b5 type A (microsomal)	465413	6118 // electron transport // inferred from electronic annotation /// 6810 // transport // inferred from electronic annotation /// 6091 // generation of precursor metabolites and energy // not recorded	4129 // cytochrome-c oxidase activity // traceable author statement /// 5506 // iron ion binding // inferred from electronic annotation /// 46872 // metal ion binding // inferred from electronic annotation	---
203209_at	2.29	0.0140184	RFC5	replication factor C (activator 1) 5, 36.5kDa	506989	6260 // DNA replication // non-traceable author statement /// 6281 // DNA repair // non-traceable author statement /// 6260 // DNA replication // inferred from electronic annotation	166 // nucleotide binding // inferred from electronic annotation /// 5524 // ATP binding // inferred from electronic annotation /// 17111 // nucleoside-triphosphatase activity // inferred from electronic annotation /// 19899 // enzyme binding // non-traceable author statement	DNA_replication_Reactome // GenMAPP
218755_at	2.29	0.0316809	KIF20A	kinesin family member 20A	73625	7018 // microtubule-based movement // inferred from electronic annotation /// 15031 // protein transport // inferred from electronic annotation /// 16192 // vesicle-mediated transport // traceable author statement /// 6810 // transport // inferred from electronic annotation	166 // nucleotide binding // inferred from electronic annotation /// 3777 // microtubule motor activity // inferred from electronic annotation /// 5215 // transporter activity // traceable author statement /// 5524 // ATP binding // inferred from electronic annotation /// 3774 // motor activity // inferred from electronic annotation	---
209053_s_at	2.28	0.00181181	WHSC1	Wolf-Hirschhorn syndrome candidate 1	113876	6355 // regulation of transcription, DNA-dependent // inferred from electronic annotation /// 9653 // morphogenesis // traceable author statement	3677 // DNA binding // inferred from electronic annotation /// 5515 // protein binding // inferred from electronic annotation /// 8270 // zinc ion binding // inferred from electronic annotation	---
213626_at	2.28	0.00247417	CBR4	carbonyl reductase 4	481166	8152 // metabolism // inferred from electronic annotation /// 9239 // enterobactin biosynthesis // inferred from electronic annotation	16491 // oxidoreductase activity // inferred from electronic annotation /// 4316 // 3-oxoacyl-[acyl-carrier protein] reductase activity // inferred from electronic annotation /// 5525 // GTP binding // inferred from electronic annotation /// 8667 // 2,3-dihydro-2,3-dihydroxybenzoate dehydrogenase activity // inferred from electronic annotation	---
1558152_at	2.28	0.00465411	TSPAN4	Tetraspanin 4	437594	6461 // protein complex assembly // traceable author statement /// 6629 // lipid metabolism // inferred from electronic annotation /// 6414 // translational elongation // inferred from electronic annotation /// 7601 // visual perception // inferred from electronic annotation /// 7605 // sensory perception of sound // inferred from electronic annotation /// 8152 // metabolism // inferred from elec…	5515 // protein binding // inferred from physical interaction /// 3735 // structural constituent of ribosome // inferred from electronic annotation /// 16491 // oxidoreductase activity // inferred from electronic annotation /// 5509 // calcium ion binding // inferred from electronic annotation /// 3723 // RNA binding // traceable author statement /// 3735 // structural constituent of ribosome // …	Ribosomal_Proteins // GenMAPP
204091_at	2.28	0.00635423	PDE6D	phosphodiesterase 6D, cGMP-specific, rod, delta	516808	7601 // visual perception // traceable author statement /// 50896 // response to stimulus // inferred from electronic annotation /// 7601 // visual perception // inferred from electronic annotation	4114 // 3',5'-cyclic-nucleotide phosphodiesterase activity // inferred from electronic annotation /// 16787 // hydrolase activity // inferred from electronic annotation	---
228606_at	2.28	0.00968264	MGC33212	hypothetical protein MGC33212	---	---	---	---
220011_at	2.28	0.0127149	C1orf135	chromosome 1 open reading frame 135	149305	---	---	---
236513_at	2.28	0.0161835	MGC21644	Hypothetical protein MGC21644	314261	---	---	---
212603_at	2.28	0.0195888	MRPS31	mitochondrial ribosomal protein S31	154655	---	---	---
201323_at	2.28	0.0234035	EBNA1BP2	EBNA1 binding protein 2	346868	7046 // ribosome biogenesis // inferred from electronic annotation	---	---
224839_s_at	2.28	0.0436801	GPT2	glutamic pyruvate transaminase (alanine aminotransferase) 2	460693	9058 // biosynthesis // inferred from electronic annotation	4021 // alanine transaminase activity // inferred from electronic annotation /// 8483 // transaminase activity // inferred from electronic annotation /// 16740 // transferase activity // inferred from electronic annotation /// 16769 // transferase activity, transferring nitrogenous groups // inferred from electronic annotation /// 16847 // 1-aminocyclopropane-1-carboxylate synthase activity // in…	Glutamate metabolism // KEGG /// Alanine and aspartate metabolism // KEGG /// Carbon fixation // KEGG
222428_s_at	2.27	0.00247475	LARS	leucyl-tRNA synthetase	432674	6412 // protein biosynthesis // inferred from electronic annotation /// 6418 // tRNA aminoacylation for protein translation // inferred from electronic annotation /// 6423 // cysteinyl-tRNA aminoacylation // inferred from electronic annotation	166 // nucleotide binding // inferred from electronic annotation /// 4812 // aminoacyl-tRNA ligase activity // inferred from electronic annotation /// 4817 // cysteine-tRNA ligase activity // inferred from electronic annotation /// 4823 // leucine-tRNA ligase activity // inferred from electronic annotation /// 5524 // ATP binding // inferred from electronic annotation /// 16874 // ligase activity…	Valine, leucine and isoleucine biosynthesis // KEGG /// Aminoacyl-tRNA biosynthesis // KEGG
223592_s_at	2.27	0.0033442	RNF135	ring finger protein 135	29874	---	5515 // protein binding // inferred from electronic annotation /// 8270 // zinc ion binding // inferred from electronic annotation /// 46872 // metal ion binding // inferred from electronic annotation	---
236535_at	2.27	0.0107613	SMC6	structural maintenance of chromosomes 6	526728	51276 // chromosome organization and biogenesis // inferred from electronic annotation	5524 // ATP binding // inferred from electronic annotation	---
225060_at	2.27	0.012486	LRP11	low density lipoprotein receptor-related protein 11	408355	---	4872 // receptor activity // inferred from electronic annotation	---
228190_at	2.27	0.0139386	CTR9	Ctr9, Paf1/RNA polymerase II complex component, homolog (S. cerevisiae)	173288	---	5488 // binding // inferred from electronic annotation	---
208002_s_at	2.27	0.0163899	ACOT7	acyl-CoA thioesterase 7	126137	6629 // lipid metabolism // traceable author statement	62 // acyl-CoA binding // traceable author statement /// 4759 // serine esterase activity // inferred from electronic annotation /// 16290 // palmitoyl-CoA hydrolase activity // inferred from electronic annotation /// 16787 // hydrolase activity // inferred from electronic annotation /// 3824 // catalytic activity // inferred from electronic annotation /// 3824 // catalytic activity // traceable …	---
202447_at	2.27	0.0173312	DECR1	2,4-dienoyl CoA reductase 1, mitochondrial	492212	8152 // metabolism // inferred from electronic annotation	8670 // 2,4-dienoyl-CoA reductase (NADPH) activity // traceable author statement /// 16491 // oxidoreductase activity // inferred from electronic annotation /// 8670 // 2,4-dienoyl-CoA reductase (NADPH) activity // inferred from electronic annotation	---
229025_s_at	2.27	0.01775	IMMP1L	IMP1 inner mitochondrial membrane peptidase-like (S. cerevisiae)	502223	6508 // proteolysis // inferred from electronic annotation	8236 // serine-type peptidase activity // inferred from electronic annotation	---
206120_at	2.27	0.0350487	CD33	CD33 molecule	83731	7155 // cell adhesion // non-traceable author statement /// 7165 // signal transduction // traceable author statement /// 7267 // cell-cell signaling // traceable author statement /// 8285 // negative regulation of cell proliferation // traceable author statement /// 7155 // cell adhesion // inferred from electronic annotation	4872 // receptor activity // traceable author statement /// 5515 // protein binding // inferred from electronic annotation /// 5529 // sugar binding // inferred from electronic annotation	---
219002_at	2.26	0.00201091	FASTKD1	FAST kinase domains 1	529276	6915 // apoptosis // inferred from electronic annotation	4672 // protein kinase activity // inferred from electronic annotation /// 5524 // ATP binding // inferred from electronic annotation	---
202738_s_at	2.26	0.00255214	PHKB	phosphorylase kinase, beta	78060	5975 // carbohydrate metabolism // inferred from electronic annotation /// 5980 // glycogen catabolism // not recorded /// 6091 // generation of precursor metabolites and energy // traceable author statement /// 5977 // glycogen metabolism // inferred from electronic annotation /// 5977 // glycogen metabolism // traceable author statement	4689 // phosphorylase kinase activity // not recorded /// 5516 // calmodulin binding // inferred from electronic annotation /// 8607 // phosphorylase kinase regulator activity // not recorded	Glycogen_Metabolism // GenMAPP
230326_s_at	2.26	0.00422107	C11orf73	chromosome 11 open reading frame 73	283322	7275 // development // inferred from electronic annotation	---	---
204300_at	2.26	0.00585715	PET112L	PET112-like (yeast)	119316	6412 // protein biosynthesis // traceable author statement /// 6412 // protein biosynthesis // inferred from electronic annotation	8135 // translation factor activity, nucleic acid binding // traceable author statement /// 16874 // ligase activity // inferred from electronic annotation /// 17068 // glutamyl-tRNA(Gln) amidotransferase activity // inferred from electronic annotation /// 16884 // carbon-nitrogen ligase activity, with glutamine as amido-N-donor // inferred from electronic annotation	---
201021_s_at	2.26	0.014088	DSTN	destrin (actin depolymerizing factor)	304192	---	3779 // actin binding // inferred from electronic annotation	---
57540_at	2.26	0.0172111	RBKS	ribokinase	---	5975 // carbohydrate metabolism // inferred from electronic annotation /// 6014 // D-ribose metabolism // inferred from electronic annotation	4747 // ribokinase activity // inferred from electronic annotation /// 16301 // kinase activity // inferred from electronic annotation /// 16740 // transferase activity // inferred from electronic annotation	Pentose phosphate pathway // KEGG
203715_at	2.26	0.0177315	TBCE	tubulin-specific chaperone e	---	6457 // protein folding // inferred from electronic annotation /// 7025 // beta-tubulin folding // traceable author statement	51082 // unfolded protein binding // inferred from electronic annotation /// 51087 // chaperone binding // traceable author statement	---
223172_s_at	2.26	0.0243851	MTP18	mitochondrial protein 18 kDa	---	6915 // apoptosis // inferred from electronic annotation	---	---
226019_at	2.26	0.0384085	OMA1	OMA1 homolog, zinc metallopeptidase (S. cerevisiae)	425769	6508 // proteolysis // inferred from electronic annotation	4222 // metalloendopeptidase activity // inferred from electronic annotation /// 8270 // zinc ion binding // inferred from electronic annotation /// 8233 // peptidase activity // inferred from electronic annotation /// 8237 // metallopeptidase activity // inferred from electronic annotation /// 16787 // hydrolase activity // inferred from electronic annotation	---
218676_s_at	2.26	0.0401001	PCTP	phosphatidylcholine transfer protein	285218	6869 // lipid transport // non-traceable author statement /// 6810 // transport // inferred from electronic annotation /// 6869 // lipid transport // inferred from electronic annotation	8289 // lipid binding // inferred from electronic annotation /// 8525 // phosphatidylcholine transporter activity // traceable author statement	---
213092_x_at	2.25	0.000771249	DNAJC9	DnaJ (Hsp40) homolog, subfamily C, member 9	---	6457 // protein folding // inferred from electronic annotation	31072 // heat shock protein binding // inferred from electronic annotation /// 51082 // unfolded protein binding // inferred from electronic annotation	---
228828_at	2.25	0.00122116	RNF43	Ring finger protein 43	584916	6512 // ubiquitin cycle // inferred from electronic annotation	5515 // protein binding // inferred from electronic annotation /// 8270 // zinc ion binding // inferred from electronic annotation /// 46872 // metal ion binding // inferred from electronic annotation	---
238859_at	2.25	0.00167637	KIAA0974	KIAA0974	408577	6457 // protein folding // inferred from electronic annotation	31072 // heat shock protein binding // inferred from electronic annotation /// 51082 // unfolded protein binding // inferred from electronic annotation	---
223156_at	2.25	0.0179211	MRPS23	mitochondrial ribosomal protein S23	5836	---	---	---
222569_at	2.25	0.0202438	UGCGL1	UDP-glucose ceramide glucosyltransferase-like 1	34180	6486 // protein amino acid glycosylation // inferred from electronic annotation /// 51084 // posttranslational protein folding // traceable author statement	3980 // UDP-glucose:glycoprotein glucosyltransferase activity // inferred from direct assay /// 3980 // UDP-glucose:glycoprotein glucosyltransferase activity // inferred from electronic annotation /// 16757 // transferase activity, transferring glycosyl groups // inferred from electronic annotation /// 51082 // unfolded protein binding // inferred from direct assay /// 5515 // protein binding // …	---
224791_at	2.25	0.0347571	DDEF1	development and differentiation enhancing factor 1	106015	43087 // regulation of GTPase activity // inferred from electronic annotation	5096 // GTPase activator activity // inferred from electronic annotation /// 5515 // protein binding // inferred from physical interaction /// 8270 // zinc ion binding // inferred from electronic annotation /// 46872 // metal ion binding // inferred from electronic annotation	---
217966_s_at	2.25	0.0416375	C1orf24	chromosome 1 open reading frame 24	518662	---	31072 // heat shock protein binding // inferred from electronic annotation	---
218112_at	2.24	0.00126485	MRPS34	mitochondrial ribosomal protein S34	157160	---	---	---
222705_s_at	2.24	0.0126793	SLC25A15	solute carrier family 25 (mitochondrial carrier; ornithine transporter) member 15	631772	50 // urea cycle // traceable author statement /// 66 // mitochondrial ornithine transport // traceable author statement /// 6520 // amino acid metabolism // traceable author statement /// 6810 // transport // inferred from electronic annotation	64 // L-ornithine transporter activity // traceable author statement /// 5215 // transporter activity // inferred from electronic annotation /// 5488 // binding // inferred from electronic annotation	---
201202_at	2.24	0.0131642	PCNA	proliferating cell nuclear antigen	147433	74 // regulation of progression through cell cycle // non-traceable author statement /// 6260 // DNA replication // non-traceable author statement /// 6275 // regulation of DNA replication // inferred from electronic annotation /// 6281 // DNA repair // non-traceable author statement /// 8283 // cell proliferation // traceable author statement /// 48015 // phosphoinositide-mediated signaling // n…	3677 // DNA binding // inferred from electronic annotation /// 5515 // protein binding // inferred from physical interaction /// 30337 // DNA polymerase processivity factor activity // inferred from electronic annotation /// 3677 // DNA binding // not recorded	Cell_cycle_KEGG // GenMAPP /// DNA_replication_Reactome // GenMAPP /// G1_to_S_cell_cycle_Reactome // GenMAPP
201666_at	2.24	0.0294259	TIMP1	TIMP metallopeptidase inhibitor 1	522632	7275 // development // not recorded /// 8284 // positive regulation of cell proliferation // traceable author statement /// 43249 // erythrocyte maturation // inferred from electronic annotation /// 51045 // negative regulation of membrane protein ectodomain proteolysis // inferred from direct assay	4857 // enzyme inhibitor activity // inferred from electronic annotation /// 5515 // protein binding // inferred from physical interaction /// 8191 // metalloendopeptidase inhibitor activity // inferred from direct assay /// 8191 // metalloendopeptidase inhibitor activity // inferred from electronic annotation	MAPK_Cascade // GenMAPP /// MAPK_Cascade // GenMAPP /// Matrix_Metalloproteinases // GenMAPP /// Matrix_Metalloproteinases // GenMAPP
211385_x_at	2.23	0.000445419	SULT1A2	sulfotransferase family, cytosolic, 1A, phenol-preferring, member 2	546304	6584 // catecholamine metabolism // inferred from electronic annotation /// 6629 // lipid metabolism // inferred from electronic annotation /// 8202 // steroid metabolism // inferred from electronic annotation /// 9309 // amine biosynthesis // traceable author statement	4062 // aryl sulfotransferase activity // inferred from electronic annotation /// 16740 // transferase activity // inferred from electronic annotation /// 8146 // sulfotransferase activity // inferred from electronic annotation /// 8146 // sulfotransferase activity // traceable author statement	Sulfur metabolism // KEGG
223202_s_at	2.23	0.00145319	TMEM164 /// LOC653522	transmembrane protein 164 /// similar to hypothetical protein FLJ22679	496572	---	---	---
225439_at	2.23	0.00370238	NUDCD1	NudC domain containing 1	558577	---	---	---
238480_at	2.23	0.00413082	C18orf17	Chromosome 18 open reading frame 17	128576	---	5488 // binding // inferred from electronic annotation	---
202145_at	2.23	0.0064868	LY6E	lymphocyte antigen 6 complex, locus E	521903	6952 // defense response // not recorded /// 7166 // cell surface receptor linked signal transduction // traceable author statement	48503 // GPI anchor binding // inferred from electronic annotation	---
227959_at	2.23	0.0334179	---	Transcribed locus	586830	---	---	---
210672_s_at	2.22	0.00356764	C16orf35	chromosome 16 open reading frame 35	19699	---	---	---
216212_s_at	2.22	0.0109289	DKC1	dyskeratosis congenita 1, dyskerin	4747	74 // regulation of progression through cell cycle // traceable author statement /// 6364 // rRNA processing // traceable author statement /// 7004 // telomere maintenance via telomerase // traceable author statement /// 8283 // cell proliferation // traceable author statement /// 6364 // rRNA processing // inferred from electronic annotation /// 6396 // RNA processing // inferred from electronic…	3720 // telomerase activity // inferred from direct assay /// 3723 // RNA binding // traceable author statement /// 4730 // pseudouridylate synthase activity // inferred from electronic annotation /// 16853 // isomerase activity // inferred from electronic annotation /// 3723 // RNA binding // inferred from electronic annotation /// 4365 // glyceraldehyde-3-phosphate dehydrogenase (phosphorylatin…	Glycolysis_and_Gluconeogenesis // GenMAPP
236918_s_at	2.22	0.0131618	LRRC34	leucine rich repeat containing 34	591289	---	---	---
217317_s_at	2.22	0.0136678	HERC2P2 /// LOC440248 /// LOC653717	hect domain and RLD 2 pseudogene 2 /// hypothetical LOC440248 /// similar to hect domain and RLD 2	531509	---	8270 // zinc ion binding // inferred from electronic annotation	---
218493_at	2.22	0.0146322	C16orf33	chromosome 16 open reading frame 33	15277	398 // nuclear mRNA splicing, via spliceosome // inferred from electronic annotation /// 6464 // protein modification // inferred from electronic annotation /// 8380 // RNA splicing // Unknown /// 6397 // mRNA processing // inferred from electronic annotation	---	---
226031_at	2.22	0.0492627	FLJ20097	hypothetical protein LOC55610, isoform b	222282	160 // two-component signal transduction system (phosphorelay) // inferred from electronic annotation	155 // two-component sensor activity // inferred from electronic annotation	---
203396_at	2.21	0.00157335	PSMA4	proteasome (prosome, macropain) subunit, alpha type, 4	251531	6511 // ubiquitin-dependent protein catabolism // inferred from electronic annotation	4298 // threonine endopeptidase activity // inferred from electronic annotation /// 4175 // endopeptidase activity // inferred from electronic annotation /// 8233 // peptidase activity // inferred from electronic annotation /// 16787 // hydrolase activity // inferred from electronic annotation	Circadian_Exercise // GenMAPP /// Proteasome_Degradation // GenMAPP /// Circadian_Exercise // GenMAPP /// Proteasome_Degradation // GenMAPP /// Proteasome // KEGG
203119_at	2.21	0.0015858	CCDC86	coiled-coil domain containing 86	4253	---	---	---
226093_at	2.21	0.00201091	DCP1B	DCP1 decapping enzyme homolog B (S. cerevisiae)	130934	184 // mRNA catabolism, nonsense-mediated decay // inferred from electronic annotation	16787 // hydrolase activity // inferred from electronic annotation	---
212296_at	2.21	0.0036834	PSMD14	proteasome (prosome, macropain) 26S subunit, non-ATPase, 14	567410	6511 // ubiquitin-dependent protein catabolism // traceable author statement	---	---
201144_s_at	2.21	0.0075526	EIF2S1	eukaryotic translation initiation factor 2, subunit 1 alpha, 35kDa	151777	6445 // regulation of translation // inferred from electronic annotation /// 6412 // protein biosynthesis // inferred from electronic annotation /// 6417 // regulation of protein biosynthesis // inferred from electronic annotation	3723 // RNA binding // inferred from electronic annotation /// 3743 // translation initiation factor activity // traceable author statement /// 3676 // nucleic acid binding // inferred from electronic annotation /// 3743 // translation initiation factor activity // inferred from electronic annotation	Translation_Factors // GenMAPP
201178_at	2.21	0.00809568	FBXO7	F-box protein 7	5912	6511 // ubiquitin-dependent protein catabolism // traceable author statement /// 31647 // regulation of protein stability // inferred from direct assay /// 6512 // ubiquitin cycle // inferred from electronic annotation	4842 // ubiquitin-protein ligase activity // traceable author statement /// 5515 // protein binding // inferred from physical interaction	---
205565_s_at	2.21	0.0173653	FXN	frataxin	29978	6118 // electron transport // traceable author statement /// 6879 // iron ion homeostasis // inferred from electronic annotation /// 6879 // iron ion homeostasis // traceable author statement /// 7268 // synaptic transmission // traceable author statement /// 16192 // vesicle-mediated transport // traceable author statement	4428 // inositol or phosphatidylinositol kinase activity // traceable author statement /// 5381 // iron ion transporter activity // traceable author statement /// 9055 // electron carrier activity // traceable author statement	---
213677_s_at	2.21	0.0203993	PMS1	PMS1 postmeiotic segregation increased 1 (S. cerevisiae)	111749	6298 // mismatch repair // inferred from electronic annotation /// 6298 // mismatch repair // traceable author statement /// 6355 // regulation of transcription, DNA-dependent // inferred from electronic annotation /// 7049 // cell cycle // inferred from electronic annotation /// 45786 // negative regulation of progression through cell cycle // inferred from electronic annotation	3677 // DNA binding // traceable author statement /// 5524 // ATP binding // inferred from electronic annotation /// 3677 // DNA binding // inferred from electronic annotation /// 5525 // GTP binding // inferred from electronic annotation /// 166 // nucleotide binding // inferred from electronic annotation	---
235044_at	2.21	0.0458952	CYYR1	cysteine/tyrosine-rich 1	37445	---	---	---
212115_at	2.2	0.00408301	C16orf34	chromosome 16 open reading frame 34	513261	---	---	---
208872_s_at	2.2	0.0150358	REEP5	receptor accessory protein 5	429608	9401 // phosphoenolpyruvate-dependent sugar phosphotransferase system // inferred from electronic annotation	5351 // sugar porter activity // inferred from electronic annotation	---
236487_at	2.2	0.022431	FLJ30655	Hypothetical protein FLJ30655	404000	---	---	---
209513_s_at	2.2	0.0237608	HSDL2	hydroxysteroid dehydrogenase like 2	59486	8152 // metabolism // inferred from electronic annotation	5498 // sterol carrier activity // inferred from electronic annotation /// 16491 // oxidoreductase activity // inferred from electronic annotation	---
203545_at	2.2	0.026743	ALG8	asparagine-linked glycosylation 8 homolog (S. cerevisiae, alpha-1,3-glucosyltransferase)	503368	6487 // protein amino acid N-linked glycosylation // non-traceable author statement /// 6810 // transport // inferred from electronic annotation	16757 // transferase activity, transferring glycosyl groups // non-traceable author statement /// 16740 // transferase activity // inferred from electronic annotation /// 16757 // transferase activity, transferring glycosyl groups // inferred from electronic annotation	---
231311_at	2.2	0.0458952	---	CDNA FLJ11417 fis, clone HEMBA1000960	586709	---	---	---
229253_at	2.19	0.00334907	THEM4	thioesterase superfamily member 4	164070	---	3824 // catalytic activity // inferred from electronic annotation	---
207618_s_at	2.19	0.00416408	BCS1L	BCS1-like (yeast)	471401	6457 // protein folding // inferred from electronic annotation /// 6461 // protein complex assembly // traceable author statement /// 15980 // energy derivation by oxidation of organic compounds // traceable author statement	166 // nucleotide binding // inferred from electronic annotation /// 5524 // ATP binding // inferred from electronic annotation /// 17111 // nucleoside-triphosphatase activity // inferred from electronic annotation /// 51082 // unfolded protein binding // inferred from electronic annotation	---
225294_s_at	2.19	0.00785151	TRAPPC1	trafficking protein particle complex 1	24379	6810 // transport // inferred from electronic annotation /// 6888 // ER to Golgi vesicle-mediated transport // inferred from electronic annotation	---	---
228734_at	2.19	0.0129409	---	CDNA FLJ41934 fis, clone PERIC2005111	595400	---	---	---
227413_at	2.19	0.03759	UBLCP1	ubiquitin-like domain containing CTD phosphatase 1	591733	6464 // protein modification // inferred from electronic annotation	4721 // phosphoprotein phosphatase activity // inferred from electronic annotation /// 16787 // hydrolase activity // inferred from electronic annotation	---
209584_x_at	2.18	0.000974791	APOBEC3C	apolipoprotein B mRNA editing enzyme, catalytic polypeptide-like 3C	---	---	3723 // RNA binding // inferred from electronic annotation /// 8270 // zinc ion binding // inferred from electronic annotation /// 16787 // hydrolase activity // inferred from electronic annotation /// 16814 // hydrolase activity, acting on carbon-nitrogen (but not peptide) bonds, in cyclic amidines // inferred from electronic annotation /// 46872 // metal ion binding // inferred from electronic …	---
224896_s_at	2.18	0.00152226	TTL	tubulin tyrosine ligase	358997	6464 // protein modification // inferred from electronic annotation	287 // magnesium ion binding // inferred from electronic annotation /// 4835 // tubulin-tyrosine ligase activity // inferred from electronic annotation /// 5524 // ATP binding // inferred from electronic annotation /// 16874 // ligase activity // inferred from electronic annotation /// 30955 // potassium ion binding // inferred from electronic annotation /// 3824 // catalytic activity // inferred…	---
202974_at	2.18	0.00177182	MPP1	membrane protein, palmitoylated 1, 55kDa	496984	7165 // signal transduction // traceable author statement	4385 // guanylate kinase activity // traceable author statement /// 5515 // protein binding // inferred from electronic annotation	---
213427_at	2.18	0.00247929	RPP40	ribonuclease P 40kDa subunit	511756	8033 // tRNA processing // inferred from electronic annotation	4526 // ribonuclease P activity // traceable author statement /// 5515 // protein binding // inferred from physical interaction /// 16787 // hydrolase activity // inferred from electronic annotation	---
227054_at	2.18	0.00451392	LOC221143	hypothetical protein LOC221143	26674	15671 // oxygen transport // inferred from electronic annotation	5344 // oxygen transporter activity // inferred from electronic annotation	---
218291_at	2.18	0.00616196	MAPBPIP	mitogen-activated protein-binding protein-interacting protein	632483	---	4653 // polypeptide N-acetylgalactosaminyltransferase activity // inferred from electronic annotation /// 5509 // calcium ion binding // inferred from electronic annotation /// 5529 // sugar binding // inferred from electronic annotation /// 16740 // transferase activity // inferred from electronic annotation /// 16757 // transferase activity, transferring glycosyl groups // inferred from electro…	---
228217_s_at	2.18	0.016413	RP11-506K6.3	hypothetical LOC389362	207069	45941 // positive regulation of transcription // inferred from direct assay	16563 // transcriptional activator activity // inferred from direct assay	---
200041_s_at	2.18	0.0209055	BAT1	HLA-B associated transcript 1 /// HLA-B associated transcript 1	254042	398 // nuclear mRNA splicing, via spliceosome // inferred from genetic interaction /// 6406 // mRNA export from nucleus // inferred from genetic interaction /// 398 // nuclear mRNA splicing, via spliceosome // inferred from electronic annotation /// 6397 // mRNA processing // inferred from electronic annotation	166 // nucleotide binding // inferred from electronic annotation /// 3676 // nucleic acid binding // inferred from electronic annotation /// 3723 // RNA binding // inferred from electronic annotation /// 4004 // ATP-dependent RNA helicase activity // traceable author statement /// 5524 // ATP binding // inferred from electronic annotation /// 8026 // ATP-dependent helicase activity // inferred fr…	---
218146_at	2.17	0.00103683	GLT8D1	glycosyltransferase 8 domain containing 1	297304	16051 // carbohydrate biosynthesis // inferred from electronic annotation	16758 // transferase activity, transferring hexosyl groups // inferred from electronic annotation /// 16740 // transferase activity // inferred from electronic annotation	---
217946_s_at	2.17	0.00323589	SAE1	SUMO-1 activating enzyme subunit 1	515500	16567 // protein ubiquitination // inferred from sequence or structural similarity /// 16567 // protein ubiquitination // traceable author statement /// 6464 // protein modification // inferred from electronic annotation /// 6512 // ubiquitin cycle // inferred from electronic annotation	4839 // ubiquitin activating enzyme activity // inferred from sequence or structural similarity /// 4839 // ubiquitin activating enzyme activity // traceable author statement /// 8022 // protein C-terminus binding // inferred from direct assay /// 8022 // protein C-terminus binding // inferred from sequence or structural similarity /// 8047 // enzyme activator activity // traceable author stateme…	---
212330_at	2.17	0.00596165	TFDP1	transcription factor Dp-1	79353	74 // regulation of progression through cell cycle // inferred from electronic annotation /// 74 // regulation of progression through cell cycle // traceable author statement /// 6350 // transcription // inferred from electronic annotation /// 6355 // regulation of transcription, DNA-dependent // inferred from electronic annotation /// 6357 // regulation of transcription from RNA polymerase II pr…	3700 // transcription factor activity // inferred from electronic annotation /// 3700 // transcription factor activity // traceable author statement /// 3713 // transcription coactivator activity // traceable author statement /// 3677 // DNA binding // inferred from electronic annotation	Cell_cycle_KEGG // GenMAPP /// G1_to_S_cell_cycle_Reactome // GenMAPP
209790_s_at	2.17	0.0107996	CASP6	caspase 6, apoptosis-related cysteine peptidase	389452	6508 // proteolysis // inferred from direct assay /// 6915 // apoptosis // inferred from electronic annotation /// 6917 // induction of apoptosis // traceable author statement /// 6508 // proteolysis // inferred from electronic annotation /// 16042 // lipid catabolism // inferred from electronic annotation /// 6644 // phospholipid metabolism // inferred from electronic annotation /// 6508 // prot…	5515 // protein binding // inferred from physical interaction /// 8234 // cysteine-type peptidase activity // traceable author statement /// 30693 // caspase activity // inferred from electronic annotation /// 8233 // peptidase activity // inferred from electronic annotation /// 8234 // cysteine-type peptidase activity // inferred from electronic annotation /// 16787 // hydrolase activity // infe…	Apoptosis // GenMAPP /// Apoptosis_GenMAPP // GenMAPP /// Apoptosis_KEGG // GenMAPP
203931_s_at	2.17	0.0140141	MRPL12	mitochondrial ribosomal protein L12	109059	6412 // protein biosynthesis // inferred from electronic annotation /// 6412 // protein biosynthesis // traceable author statement	3723 // RNA binding // traceable author statement /// 3735 // structural constituent of ribosome // inferred from electronic annotation /// 3735 // structural constituent of ribosome // traceable author statement	---
202870_s_at	2.17	0.0163886	TRAF4	TNF receptor-associated factor 4	8375	7165 // signal transduction // traceable author statement /// 7275 // development // inferred from electronic annotation /// 42981 // regulation of apoptosis // inferred from electronic annotation /// 6915 // apoptosis // inferred from electronic annotation /// 7165 // signal transduction // inferred from electronic annotation	3677 // DNA binding // traceable author statement /// 5515 // protein binding // inferred from electronic annotation /// 8270 // zinc ion binding // inferred from electronic annotation /// 46872 // metal ion binding // inferred from electronic annotation	---
203711_s_at	2.17	0.0421821	HIBCH	3-hydroxyisobutyryl-Coenzyme A hydrolase	128598	8152 // metabolism // inferred from electronic annotation	3824 // catalytic activity // inferred from electronic annotation /// 16787 // hydrolase activity // inferred from electronic annotation /// 3860 // 3-hydroxyisobutyryl-CoA hydrolase activity // traceable author statement	---
228355_s_at	2.17	0.0429076	NDUFA12L	NDUFA12-like	591757	6118 // electron transport // inferred from electronic annotation	8137 // NADH dehydrogenase (ubiquinone) activity // inferred from electronic annotation /// 9055 // electron carrier activity // inferred from electronic annotation	---
203122_at	2.16	0.00176995	TTC15	tetratricopeptide repeat domain 15	252713	---	5488 // binding // inferred from electronic annotation	---
200708_at	2.16	0.00487616	GOT2	glutamic-oxaloacetic transaminase 2, mitochondrial (aspartate aminotransferase 2)	599470	6520 // amino acid metabolism // inferred from electronic annotation /// 6533 // aspartate catabolism // traceable author statement /// 9058 // biosynthesis // inferred from electronic annotation	4069 // aspartate transaminase activity // inferred from electronic annotation /// 3824 // catalytic activity // inferred from electronic annotation /// 8483 // transaminase activity // inferred from electronic annotation /// 16740 // transferase activity // inferred from electronic annotation /// 16769 // transferase activity, transferring nitrogenous groups // inferred from electronic annotation	Glycolysis_and_Gluconeogenesis // GenMAPP /// Glutamate metabolism // KEGG /// Alanine and aspartate metabolism // KEGG /// Cysteine metabolism // KEGG /// Arginine and proline metabolism // KEGG /// Tyrosine metabolism // KEGG /// Phenylalanine metabolism // KEGG /// Phenylalanine, tyrosine and tryptophan biosynthesis // KEGG /// Novobiocin biosynthesis // KEGG /// Carbon fixation // KEGG /// Al…
201013_s_at	2.16	0.00809195	PAICS	phosphoribosylaminoimidazole carboxylase, phosphoribosylaminoimidazole succinocarboxamide synthetase	518774	6164 // purine nucleotide biosynthesis // inferred from electronic annotation /// 6189 // 'de novo' IMP biosynthesis // inferred from electronic annotation /// 9113 // purine base biosynthesis // traceable author statement	4638 // phosphoribosylaminoimidazole carboxylase activity // inferred from electronic annotation /// 4639 // phosphoribosylaminoimidazolesuccinocarboxamide synthase activity // traceable author statement /// 5524 // ATP binding // inferred from electronic annotation /// 16829 // lyase activity // inferred from electronic annotation /// 16874 // ligase activity // inferred from electronic annotati…	Purine metabolism // KEGG /// Purine metabolism // KEGG
201128_s_at	2.16	0.00916043	ACLY	ATP citrate lyase	387567	6101 // citrate metabolism // traceable author statement /// 6200 // ATP catabolism // traceable author statement /// 8152 // metabolism // inferred from electronic annotation /// 8610 // lipid biosynthesis // inferred from electronic annotation /// 15936 // coenzyme A metabolism // traceable author statement	166 // nucleotide binding // inferred from electronic annotation /// 287 // magnesium ion binding // inferred from electronic annotation /// 3824 // catalytic activity // inferred from electronic annotation /// 3878 // ATP citrate synthase activity // traceable author statement /// 5524 // ATP binding // inferred from electronic annotation /// 16740 // transferase activity // inferred from electr…	Fatty_Acid_Synthesis // GenMAPP /// Fatty_Acid_Synthesis // GenMAPP
235339_at	2.15	0.00152226	SETDB2	SET domain, bifurcated 2	631789	16568 // chromatin modification // inferred from electronic annotation	3677 // DNA binding // inferred from electronic annotation /// 8168 // methyltransferase activity // inferred from electronic annotation /// 8270 // zinc ion binding // inferred from electronic annotation /// 16740 // transferase activity // inferred from electronic annotation /// 18024 // histone-lysine N-methyltransferase activity // inferred from electronic annotation	---
204857_at	2.15	0.00356764	MAD1L1	MAD1 mitotic arrest deficient-like 1 (yeast)	209128	89 // mitotic metaphase // non-traceable author statement /// 90 // mitotic anaphase // non-traceable author statement /// 93 // mitotic telophase // non-traceable author statement /// 7049 // cell cycle // inferred from electronic annotation /// 7093 // mitotic checkpoint // non-traceable author statement /// 51301 // cell division // inferred from electronic annotation /// 7067 // mitosis // in…	---	Cell_cycle_KEGG // GenMAPP
235783_at	2.15	0.00621829	---	---	---	---	---	---
205202_at	2.15	0.0101706	PCMT1	protein-L-isoaspartate (D-aspartate) O-methyltransferase	279257	6464 // protein modification // inferred from electronic annotation /// 6479 // protein amino acid methylation // traceable author statement	4719 // protein-L-isoaspartate (D-aspartate) O-methyltransferase activity // inferred from electronic annotation /// 8168 // methyltransferase activity // inferred from electronic annotation /// 16740 // transferase activity // inferred from electronic annotation	---
232530_at	2.15	0.0204563	LOC652226	hypothetical protein LOC652226	---	---	---	---
200648_s_at	2.15	0.0230643	GLUL	glutamate-ammonia ligase (glutamine synthetase)	518525	1505 // regulation of neurotransmitter levels // not recorded /// 6542 // glutamine biosynthesis // inferred from electronic annotation /// 6807 // nitrogen compound metabolism // inferred from electronic annotation /// 6542 // glutamine biosynthesis // not recorded	4356 // glutamate-ammonia ligase activity // inferred from electronic annotation /// 16874 // ligase activity // inferred from electronic annotation	Glutamate metabolism // KEGG /// Peptidoglycan biosynthesis // KEGG /// Nitrogen metabolism // KEGG /// Two-component system - General // KEGG
224448_s_at	2.15	0.0311635	C6orf125	chromosome 6 open reading frame 125 /// chromosome 6 open reading frame 125	93235	---	---	---
209716_at	2.15	0.0486762	CSF1	colony stimulating factor 1 (macrophage)	591402	8283 // cell proliferation // non-traceable author statement /// 8284 // positive regulation of cell proliferation // traceable author statement /// 30097 // hemopoiesis // non-traceable author statement /// 30154 // cell differentiation // non-traceable author statement /// 30225 // macrophage differentiation // traceable author statement /// 8284 // positive regulation of cell proliferation // …	5157 // macrophage colony stimulating factor receptor binding // traceable author statement /// 5125 // cytokine activity // inferred from direct assay /// 5125 // cytokine activity // inferred from electronic annotation /// 8083 // growth factor activity // inferred from electronic annotation /// 8083 // growth factor activity // non-traceable author statement	---
202739_s_at	2.14	0.00219851	PHKB	phosphorylase kinase, beta	78060	5975 // carbohydrate metabolism // inferred from electronic annotation /// 5980 // glycogen catabolism // not recorded /// 6091 // generation of precursor metabolites and energy // traceable author statement /// 5977 // glycogen metabolism // inferred from electronic annotation /// 5977 // glycogen metabolism // traceable author statement	4689 // phosphorylase kinase activity // not recorded /// 5516 // calmodulin binding // inferred from electronic annotation /// 8607 // phosphorylase kinase regulator activity // not recorded	Glycogen_Metabolism // GenMAPP
44065_at	2.14	0.00414811	C12orf52	chromosome 12 open reading frame 52	524762	---	---	---
202483_s_at	2.14	0.00472186	RANBP1	RAN binding protein 1	24763	7165 // signal transduction // traceable author statement /// 46907 // intracellular transport // inferred from electronic annotation	5092 // GDP-dissociation inhibitor activity // traceable author statement /// 5096 // GTPase activator activity // inferred from electronic annotation /// 8536 // Ran GTPase binding // traceable author statement	---
211728_s_at	2.14	0.00887252	HYAL3	hyaluronoglucosaminidase 3 /// hyaluronoglucosaminidase 3	---	5975 // carbohydrate metabolism // inferred from electronic annotation /// 6468 // protein amino acid phosphorylation // inferred from direct assay /// 6950 // response to stress // inferred from direct assay /// 7243 // protein kinase cascade // inferred from direct assay /// 6468 // protein amino acid phosphorylation // inferred from electronic annotation	4415 // hyalurononglucosaminidase activity // inferred from electronic annotation /// 287 // magnesium ion binding // inferred from direct assay /// 4674 // protein serine/threonine kinase activity // inferred from direct assay /// 5524 // ATP binding // inferred from direct assay /// 16301 // kinase activity // inferred from direct assay /// 166 // nucleotide binding // inferred from electronic …	---
205718_at	2.14	0.0131424	ITGB7	integrin, beta 7	524458	7155 // cell adhesion // traceable author statement /// 7160 // cell-matrix adhesion // inferred from electronic annotation /// 7229 // integrin-mediated signaling pathway // inferred from electronic annotation /// 7275 // development // inferred from electronic annotation /// 7155 // cell adhesion // inferred from electronic annotation	4872 // receptor activity // inferred from electronic annotation /// 42802 // identical protein binding // inferred from physical interaction /// 5515 // protein binding // inferred from electronic annotation	Integrin-mediated_cell_adhesion_KEGG // GenMAPP
202937_x_at	2.14	0.0144953	CTA-126B4.3	CGI-96 protein	534041	---	166 // nucleotide binding // inferred from electronic annotation /// 3723 // RNA binding // inferred from electronic annotation /// 3676 // nucleic acid binding // inferred from electronic annotation	---
203283_s_at	2.14	0.0181135	HS2ST1	heparan sulfate 2-O-sulfotransferase 1	48823	---	16740 // transferase activity // inferred from electronic annotation	---
217274_x_at	2.14	0.0219642	MYL4	myosin, light polypeptide 4, alkali; atrial, embryonic	463300	6941 // striated muscle contraction // non-traceable author statement	3774 // motor activity // inferred from electronic annotation /// 5509 // calcium ion binding // inferred from electronic annotation /// 8307 // structural constituent of muscle // non-traceable author statement /// 8307 // structural constituent of muscle // not recorded	Smooth_muscle_contraction // GenMAPP /// Striated_muscle_contraction // GenMAPP
226881_at	2.14	0.0258478	GRPEL2	GrpE-like 2, mitochondrial (E. coli)	511816	6457 // protein folding // inferred from electronic annotation	774 // adenyl-nucleotide exchange factor activity // inferred from electronic annotation /// 42803 // protein homodimerization activity // inferred from electronic annotation /// 51082 // unfolded protein binding // inferred from electronic annotation /// 51087 // chaperone binding // inferred from electronic annotation /// 5515 // protein binding // inferred from electronic annotation	---
232510_s_at	2.13	0.00283118	DPP3	dipeptidyl-peptidase 3	502914	6508 // proteolysis // traceable author statement /// 6508 // proteolysis // inferred from electronic annotation	4177 // aminopeptidase activity // inferred from electronic annotation /// 8237 // metallopeptidase activity // inferred from electronic annotation /// 8270 // zinc ion binding // inferred from electronic annotation /// 17039 // dipeptidyl-peptidase III activity // inferred from electronic annotation /// 46872 // metal ion binding // inferred from electronic annotation /// 8233 // peptidase activ…	---
204629_at	2.13	0.00435387	PARVB	parvin, beta	475074	7155 // cell adhesion // inferred from electronic annotation	3779 // actin binding // inferred from electronic annotation /// 5515 // protein binding // inferred from electronic annotation	---
223009_at	2.13	0.004384	C11orf59	chromosome 11 open reading frame 59	530753	---	---	---
221096_s_at	2.13	0.00455122	TMCO6	transmembrane and coiled-coil domains 6	631799	---	5488 // binding // inferred from electronic annotation	---
204441_s_at	2.13	0.00845881	POLA2	polymerase (DNA directed), alpha 2 (70kD subunit)	201897	6260 // DNA replication // non-traceable author statement /// 6260 // DNA replication // inferred from electronic annotation	3677 // DNA binding // inferred from electronic annotation /// 3887 // DNA-directed DNA polymerase activity // inferred from electronic annotation	DNA_replication_Reactome // GenMAPP /// G1_to_S_cell_cycle_Reactome // GenMAPP
213357_at	2.13	0.0127149	GTF2H5	general transcription factor IIH, polypeptide 5	356224	6281 // DNA repair // inferred from electronic annotation /// 6350 // transcription // inferred from electronic annotation /// 6355 // regulation of transcription, DNA-dependent // inferred from electronic annotation /// 6974 // response to DNA damage stimulus // inferred from electronic annotation	---	---
218257_s_at	2.13	0.0130896	UGCGL1	UDP-glucose ceramide glucosyltransferase-like 1	34180	6486 // protein amino acid glycosylation // inferred from electronic annotation /// 51084 // posttranslational protein folding // traceable author statement	3980 // UDP-glucose:glycoprotein glucosyltransferase activity // inferred from direct assay /// 3980 // UDP-glucose:glycoprotein glucosyltransferase activity // inferred from electronic annotation /// 16757 // transferase activity, transferring glycosyl groups // inferred from electronic annotation /// 51082 // unfolded protein binding // inferred from direct assay /// 5515 // protein binding // …	---
1552344_s_at	2.13	0.0243835	CNOT7	CCR4-NOT transcription complex, subunit 7	170553	5975 // carbohydrate metabolism // traceable author statement /// 6350 // transcription // inferred from electronic annotation /// 6355 // regulation of transcription, DNA-dependent // inferred from electronic annotation /// 7165 // signal transduction // traceable author statement /// 16481 // negative regulation of transcription // inferred from electronic annotation	3700 // transcription factor activity // traceable author statement /// 4871 // signal transducer activity // traceable author statement /// 5515 // protein binding // inferred from physical interaction /// 16564 // transcriptional repressor activity // inferred from electronic annotation	---
226024_at	2.12	0.000771249	COMMD1	copper metabolism (Murr1) domain containing 1	468702	---	---	---
200774_at	2.12	0.000848288	FAM120A	family with sequence similarity 120A	372003	---	---	---
224919_at	2.12	0.000884344	MRPS6	mitochondrial ribosomal protein S6	302742	6412 // protein biosynthesis // non-traceable author statement /// 6412 // protein biosynthesis // inferred from electronic annotation /// 42769 // DNA damage response, detection of DNA damage // non-traceable author statement	3735 // structural constituent of ribosome // non-traceable author statement /// 3735 // structural constituent of ribosome // inferred from electronic annotation	---
238333_s_at	2.12	0.00315715	MTG1	Mitochondrial GTPase 1 homolog (S. cerevisiae)	501578	---	5525 // GTP binding // inferred from electronic annotation	---
212563_at	2.12	0.00389663	BOP1 /// LOC653119	block of proliferation 1 /// similar to block of proliferation 1	611491	6364 // rRNA processing // inferred from electronic annotation /// 7046 // ribosome biogenesis // inferred from electronic annotation	---	---
203152_at	2.12	0.00443362	MRPL40	mitochondrial ribosomal protein L40	431307	9653 // morphogenesis // traceable author statement	---	---
227158_at	2.12	0.00487616	C14orf126	chromosome 14 open reading frame 126	---	19478 // D-amino acid catabolism // inferred from electronic annotation	16788 // hydrolase activity, acting on ester bonds // inferred from electronic annotation	---
203257_s_at	2.12	0.00595688	C11orf49	chromosome 11 open reading frame 49	368296	---	5509 // calcium ion binding // inferred from electronic annotation	---
222427_s_at	2.12	0.00603008	LARS	leucyl-tRNA synthetase	432674	6412 // protein biosynthesis // inferred from electronic annotation /// 6418 // tRNA aminoacylation for protein translation // inferred from electronic annotation /// 6423 // cysteinyl-tRNA aminoacylation // inferred from electronic annotation	166 // nucleotide binding // inferred from electronic annotation /// 4812 // aminoacyl-tRNA ligase activity // inferred from electronic annotation /// 4817 // cysteine-tRNA ligase activity // inferred from electronic annotation /// 4823 // leucine-tRNA ligase activity // inferred from electronic annotation /// 5524 // ATP binding // inferred from electronic annotation /// 16874 // ligase activity…	Valine, leucine and isoleucine biosynthesis // KEGG /// Aminoacyl-tRNA biosynthesis // KEGG
221253_s_at	2.12	0.0122332	TXNDC5	thioredoxin domain containing 5 /// thioredoxin domain containing 5	150837	6916 // anti-apoptosis // traceable author statement	9055 // electron carrier activity // inferred from electronic annotation /// 15035 // protein disulfide oxidoreductase activity // inferred from electronic annotation /// 16853 // isomerase activity // inferred from electronic annotation /// 5515 // protein binding // inferred from physical interaction /// 16308 // 1-phosphatidylinositol-4-phosphate 5-kinase activity // inferred from electronic a…	---
225485_at	2.12	0.0129144	TSGA14	testis specific, 14	368315	---	---	---
212604_at	2.12	0.0164594	MRPS31	mitochondrial ribosomal protein S31	154655	---	---	---
201577_at	2.12	0.0202438	NME1	non-metastatic cells 1, protein (NM23A) expressed in	463456	6183 // GTP biosynthesis // inferred from electronic annotation /// 6228 // UTP biosynthesis // inferred from electronic annotation /// 6241 // CTP biosynthesis // inferred from electronic annotation /// 7049 // cell cycle // inferred from electronic annotation /// 8285 // negative regulation of cell proliferation // traceable author statement /// 9117 // nucleotide metabolism // inferred from el…	166 // nucleotide binding // inferred from electronic annotation /// 287 // magnesium ion binding // inferred from direct assay /// 287 // magnesium ion binding // inferred from electronic annotation /// 3677 // DNA binding // Unknown /// 4536 // deoxyribonuclease activity // inferred from direct assay /// 4550 // nucleoside diphosphate kinase activity // inferred from electronic annotation /// 4…	Nucleotide_Metabolism // GenMAPP /// Purine metabolism // KEGG /// Pyrimidine metabolism // KEGG
230176_at	2.12	0.0208506	---	Transcribed locus	596849	---	---	---
222939_s_at	2.12	0.0249878	SLC16A10	solute carrier family 16, member 10 (aromatic amino acid transporter)	591327	6810 // transport // inferred from electronic annotation	5215 // transporter activity // inferred from electronic annotation	---
203465_at	2.12	0.038856	MRPL19	mitochondrial ribosomal protein L19	44024	6412 // protein biosynthesis // inferred from sequence or structural similarity /// 6412 // protein biosynthesis // inferred from electronic annotation	3735 // structural constituent of ribosome // inferred from electronic annotation	Ribosomal_Proteins // GenMAPP
219905_at	2.12	0.0391974	ERMAP	erythroblast membrane-associated protein (Scianna blood group)	439437	---	---	---
200752_s_at	2.11	0.00124864	CAPN1	calpain 1, (mu/I) large subunit	502842	6508 // proteolysis // inferred from electronic annotation /// 8284 // positive regulation of cell proliferation // traceable author statement	4198 // calpain activity // inferred from electronic annotation /// 5509 // calcium ion binding // inferred from electronic annotation /// 4197 // cysteine-type endopeptidase activity // inferred from electronic annotation /// 8233 // peptidase activity // inferred from electronic annotation /// 8234 // cysteine-type peptidase activity // inferred from electronic annotation /// 16787 // hydrolase…	Integrin-mediated_cell_adhesion_KEGG // GenMAPP
211576_s_at	2.11	0.00355903	SLC19A1	solute carrier family 19 (folate transporter), member 1	---	6810 // transport // inferred from electronic annotation /// 15884 // folic acid transport // traceable author statement	5542 // folic acid binding // inferred from electronic annotation /// 8517 // folic acid transporter activity // traceable author statement /// 8518 // reduced folate carrier activity // inferred from electronic annotation /// 15350 // methotrexate transporter activity // traceable author statement /// 45735 // nutrient reservoir activity // inferred from electronic annotation	---
212055_at	2.11	0.00644955	C18orf10	chromosome 18 open reading frame 10	558473	---	---	---
205692_s_at	2.11	0.0112225	CD38	CD38 molecule	479214	6091 // generation of precursor metabolites and energy // not recorded /// 7165 // signal transduction // non-traceable author statement /// 8624 // induction of apoptosis by extracellular signals // traceable author statement	3953 // NAD+ nucleosidase activity // inferred from electronic annotation /// 4872 // receptor activity // inferred from electronic annotation /// 16787 // hydrolase activity // inferred from electronic annotation /// 3824 // catalytic activity // not recorded	Nicotinate and nicotinamide metabolism // KEGG /// Calcium signaling pathway // KEGG
43544_at	2.11	0.0130573	THRAP5	thyroid hormone receptor associated protein 5	365207	6350 // transcription // inferred from electronic annotation /// 6357 // regulation of transcription from RNA polymerase II promoter // non-traceable author statement /// 6367 // transcription initiation from RNA polymerase II promoter // inferred from direct assay /// 30521 // androgen receptor signaling pathway // inferred from direct assay /// 30518 // steroid hormone receptor signaling pathwa…	3712 // transcription cofactor activity // inferred from direct assay /// 4872 // receptor activity // inferred from direct assay /// 16455 // RNA polymerase II transcription mediator activity // non-traceable author statement /// 16563 // transcriptional activator activity // inferred from direct assay /// 30375 // thyroid hormone receptor coactivator activity // inferred from direct assay /// 4…	---
218452_at	2.11	0.0150471	SMARCAL1	SWI/SNF related, matrix associated, actin dependent regulator of chromatin, subfamily a-like 1	516674	16568 // chromatin modification // inferred from electronic annotation	166 // nucleotide binding // inferred from electronic annotation /// 3677 // DNA binding // inferred from electronic annotation /// 5524 // ATP binding // inferred from electronic annotation /// 8026 // ATP-dependent helicase activity // inferred from electronic annotation /// 16787 // hydrolase activity // inferred from electronic annotation /// 3676 // nucleic acid binding // inferred from elec…	---
219510_at	2.11	0.0201544	POLQ	polymerase (DNA directed), theta	241517	6260 // DNA replication // inferred from electronic annotation /// 6281 // DNA repair // traceable author statement /// 6281 // DNA repair // inferred from electronic annotation /// 6974 // response to DNA damage stimulus // inferred from electronic annotation	166 // nucleotide binding // inferred from electronic annotation /// 3684 // damaged DNA binding // traceable author statement /// 3887 // DNA-directed DNA polymerase activity // traceable author statement /// 5524 // ATP binding // inferred from electronic annotation /// 16740 // transferase activity // inferred from electronic annotation /// 3677 // DNA binding // inferred from electronic annot…	Purine metabolism // KEGG /// Pyrimidine metabolism // KEGG /// DNA polymerase // KEGG
226901_at	2.11	0.0221056	C17orf58	chromosome 17 open reading frame 58	90790	---	---	---
59644_at	2.11	0.0230873	BMP2K	BMP2 inducible kinase	146551	6468 // protein amino acid phosphorylation // inferred from electronic annotation	166 // nucleotide binding // inferred from electronic annotation /// 4674 // protein serine/threonine kinase activity // inferred from electronic annotation /// 5524 // ATP binding // inferred from electronic annotation /// 16740 // transferase activity // inferred from electronic annotation /// 4672 // protein kinase activity // inferred from electronic annotation /// 16301 // kinase activity //…	---
203814_s_at	2.11	0.023711	NQO2	NAD(P)H dehydrogenase, quinone 2	533050	6118 // electron transport // inferred from electronic annotation	3955 // NAD(P)H dehydrogenase (quinone) activity // inferred from electronic annotation /// 8270 // zinc ion binding // inferred from electronic annotation /// 8753 // NADPH dehydrogenase (quinone) activity // traceable author statement /// 9055 // electron carrier activity // traceable author statement /// 46872 // metal ion binding // inferred from electronic annotation /// 16491 // oxidoreduct…	---
222477_s_at	2.11	0.0253413	TM7SF3	transmembrane 7 superfamily member 3	438641	---	---	---
228487_s_at	2.11	0.0284788	---	Transcribed locus, strongly similar to NP_002946.3 ras responsive element binding protein 1; RAS-responsive element binding protein-1; DNA-binding protein [Homo sapiens]	298248	---	---	---
1556285_s_at	2.11	0.0339137	PPA2	pyrophosphatase (inorganic) 2	480452	6796 // phosphate metabolism // inferred from electronic annotation	287 // magnesium ion binding // inferred from electronic annotation /// 4427 // inorganic diphosphatase activity // inferred from electronic annotation /// 16787 // hydrolase activity // inferred from electronic annotation /// 46872 // metal ion binding // inferred from electronic annotation	Oxidative phosphorylation // KEGG
229058_at	2.1	0.00152226	ANKRD16	ankyrin repeat domain 16	289828	---	---	---
218460_at	2.1	0.00476814	HEATR2	HEAT repeat containing 2	535896	---	5488 // binding // inferred from electronic annotation	---
225787_at	2.1	0.00636712	UBE2F	ubiquitin-conjugating enzyme E2F (putative)	471785	6464 // protein modification // inferred from electronic annotation /// 6512 // ubiquitin cycle // inferred from electronic annotation	4842 // ubiquitin-protein ligase activity // inferred from electronic annotation /// 16874 // ligase activity // inferred from electronic annotation	---
218003_s_at	2.1	0.00654129	FKBP3	FK506 binding protein 3, 25kDa	509226	6457 // protein folding // inferred from electronic annotation	3755 // peptidyl-prolyl cis-trans isomerase activity // inferred from electronic annotation /// 4872 // receptor activity // traceable author statement /// 5528 // FK506 binding // traceable author statement /// 16853 // isomerase activity // inferred from electronic annotation	Calcium signaling pathway // KEGG
218957_s_at	2.1	0.018936	WDR71	WD repeat domain 71	525017	---	---	---
218542_at	2.1	0.0214138	CEP55	centrosomal protein 55kDa	14559	7049 // cell cycle // inferred from electronic annotation /// 7067 // mitosis // inferred from electronic annotation /// 51301 // cell division // inferred from electronic annotation	---	---
223989_s_at	2.1	0.0356763	REXO2	REX2, RNA exonuclease 2 homolog (S. cerevisiae)	7527	9117 // nucleotide metabolism // traceable author statement /// 6139 // nucleobase, nucleoside, nucleotide and nucleic acid metabolism // inferred from direct assay	8408 // 3'-5' exonuclease activity // inferred from direct assay /// 16787 // hydrolase activity // inferred from electronic annotation /// 30145 // manganese ion binding // inferred from electronic annotation /// 4527 // exonuclease activity // inferred from electronic annotation /// 4518 // nuclease activity // inferred from electronic annotation /// 8408 // 3'-5' exonuclease activity // tracea…	---
222192_s_at	2.09	0.0010494	C2orf43	chromosome 2 open reading frame 43	187823	---	16787 // hydrolase activity // inferred from electronic annotation	---
227686_at	2.09	0.00190068	OXNAD1	oxidoreductase NAD-binding domain containing 1	475602	6118 // electron transport // inferred from electronic annotation	16491 // oxidoreductase activity // inferred from electronic annotation	---
225324_at	2.09	0.00275367	CRLS1	cardiolipin synthase 1	224764	8654 // phospholipid biosynthesis // inferred from electronic annotation	16740 // transferase activity // inferred from electronic annotation	---
227896_at	2.09	0.00348556	BCCIP	BRCA2 and CDKN1A interacting protein	370292	79 // regulation of cyclin-dependent protein kinase activity // inferred from direct assay /// 79 // regulation of cyclin-dependent protein kinase activity // traceable author statement	19207 // kinase regulator activity // inferred from direct assay	---
222849_s_at	2.09	0.00602941	SCRN3	secernin 3	470679	6508 // proteolysis // inferred from electronic annotation	16805 // dipeptidase activity // inferred from electronic annotation	---
224623_at	2.09	0.0101144	THOC3	THO complex 3	548868	398 // nuclear mRNA splicing, via spliceosome // inferred from electronic annotation /// 6406 // mRNA export from nucleus // inferred from electronic annotation /// 6810 // transport // inferred from electronic annotation /// 6397 // mRNA processing // inferred from electronic annotation	3723 // RNA binding // inferred from electronic annotation	---
209804_at	2.09	0.0227815	DCLRE1A	DNA cross-link repair 1A (PSO2 homolog, S. cerevisiae)	1560	6281 // DNA repair // inferred from electronic annotation /// 7049 // cell cycle // inferred from electronic annotation /// 7067 // mitosis // inferred from electronic annotation /// 51301 // cell division // inferred from electronic annotation /// 6974 // response to DNA damage stimulus // inferred from electronic annotation	---	---
233827_s_at	2.09	0.0246354	SUPT16H	suppressor of Ty 16 homolog (S. cerevisiae)	213724	6260 // DNA replication // inferred from electronic annotation /// 6281 // DNA repair // inferred from electronic annotation /// 6337 // nucleosome disassembly // traceable author statement /// 6350 // transcription // inferred from electronic annotation /// 6355 // regulation of transcription, DNA-dependent // inferred from electronic annotation /// 6366 // transcription from RNA polymerase II p…	8159 // positive transcription elongation factor activity // traceable author statement /// 8235 // metalloexopeptidase activity // inferred from electronic annotation	---
215719_x_at	2.09	0.024725	FAS	Fas (TNF receptor superfamily, member 6)	244139	6461 // protein complex assembly // traceable author statement /// 6915 // apoptosis // inferred from electronic annotation /// 6916 // anti-apoptosis // traceable author statement /// 6917 // induction of apoptosis // traceable author statement /// 6955 // immune response // inferred from electronic annotation /// 7165 // signal transduction // inferred from electronic annotation /// 7165 // sig…	4888 // transmembrane receptor activity // inferred from electronic annotation /// 5515 // protein binding // inferred from electronic annotation /// 42802 // identical protein binding // inferred from physical interaction /// 5515 // protein binding // inferred from physical interaction /// 4872 // receptor activity // inferred from electronic annotation /// 4871 // signal transducer activity //…	Apoptosis // GenMAPP /// Apoptosis_GenMAPP // GenMAPP /// Apoptosis_KEGG // GenMAPP
227491_at	2.09	0.0305373	---	CDNA: FLJ22539 fis, clone HRC13227	17519	---	---	---
218529_at	2.09	0.0309241	CD320	CD320 molecule	558499	1558 // regulation of cell growth // non-traceable author statement	8083 // growth factor activity // inferred from electronic annotation	---
212767_at	2.08	0.00213649	MTG1	mitochondrial GTPase 1 homolog (S. cerevisiae)	501578	---	5525 // GTP binding // inferred from electronic annotation	---
209971_x_at	2.08	0.00483336	JTV1	JTV1 gene	301613	6412 // protein biosynthesis // inferred from electronic annotation	3684 // damaged DNA binding // not recorded	---
217815_at	2.08	0.00603025	SUPT16H	suppressor of Ty 16 homolog (S. cerevisiae)	213724	6260 // DNA replication // inferred from electronic annotation /// 6281 // DNA repair // inferred from electronic annotation /// 6337 // nucleosome disassembly // traceable author statement /// 6350 // transcription // inferred from electronic annotation /// 6355 // regulation of transcription, DNA-dependent // inferred from electronic annotation /// 6366 // transcription from RNA polymerase II p…	8159 // positive transcription elongation factor activity // traceable author statement /// 8235 // metalloexopeptidase activity // inferred from electronic annotation	---
201434_at	2.08	0.00793943	TTC1	tetratricopeptide repeat domain 1	519718	6457 // protein folding // traceable author statement	51082 // unfolded protein binding // traceable author statement /// 5488 // binding // inferred from electronic annotation /// 5515 // protein binding // traceable author statement	---
225903_at	2.08	0.00797625	CDC91L1	CDC91 cell division cycle 91-like 1 (S. cerevisiae)	253319	16255 // attachment of GPI anchor to protein // traceable author statement /// 6506 // GPI anchor biosynthesis // inferred from electronic annotation	3923 // GPI-anchor transamidase activity // traceable author statement /// 48503 // GPI anchor binding // traceable author statement	---
213374_x_at	2.08	0.0101771	HIBCH	3-hydroxyisobutyryl-Coenzyme A hydrolase	128598	8152 // metabolism // inferred from electronic annotation	3824 // catalytic activity // inferred from electronic annotation /// 16787 // hydrolase activity // inferred from electronic annotation /// 3860 // 3-hydroxyisobutyryl-CoA hydrolase activity // traceable author statement	---
218893_at	2.08	0.0112718	ISOC2	isochorismatase domain containing 2	467306	8152 // metabolism // inferred from electronic annotation	5515 // protein binding // inferred from physical interaction /// 3824 // catalytic activity // inferred from electronic annotation	---
217918_at	2.08	0.0118522	DYNLRB1	dynein, light chain, roadblock-type 1	531876	7018 // microtubule-based movement // non-traceable author statement /// 7632 // visual behavior // inferred from sequence or structural similarity /// 8090 // retrograde axon cargo transport // inferred from sequence or structural similarity	3777 // microtubule motor activity // non-traceable author statement /// 5515 // protein binding // non-traceable author statement /// 5515 // protein binding // inferred from physical interaction /// 3774 // motor activity // inferred from electronic annotation	---
229595_at	2.08	0.0143566	CHCHD4	coiled-coil-helix-coiled-coil-helix domain containing 4	517815	6605 // protein targeting // inferred from electronic annotation /// 15031 // protein transport // inferred from electronic annotation /// 6810 // transport // inferred from electronic annotation	---	---
1553954_at	2.08	0.0161906	ALG14	asparagine-linked glycosylation 14 homolog (yeast)	408927	---	---	---
223035_s_at	2.08	0.0167484	FARSLB	phenylalanine-tRNA synthetase-like, beta subunit	471452	6412 // protein biosynthesis // traceable author statement /// 6432 // phenylalanyl-tRNA aminoacylation // inferred from electronic annotation /// 6412 // protein biosynthesis // inferred from electronic annotation /// 6432 // phenylalanyl-tRNA aminoacylation // not recorded	166 // nucleotide binding // inferred from electronic annotation /// 4826 // phenylalanine-tRNA ligase activity // traceable author statement /// 5524 // ATP binding // inferred from electronic annotation /// 16874 // ligase activity // inferred from electronic annotation /// 4812 // aminoacyl-tRNA ligase activity // inferred from electronic annotation /// 4826 // phenylalanine-tRNA ligase activi…	Phenylalanine, tyrosine and tryptophan biosynthesis // KEGG /// Aminoacyl-tRNA biosynthesis // KEGG
204608_at	2.08	0.0171467	ASL	argininosuccinate lyase	632015	50 // urea cycle // inferred from electronic annotation /// 6526 // arginine biosynthesis // inferred from electronic annotation /// 6527 // arginine catabolism // traceable author statement /// 8652 // amino acid biosynthesis // inferred from electronic annotation /// 50 // urea cycle // not recorded	3824 // catalytic activity // inferred from electronic annotation /// 4056 // argininosuccinate lyase activity // traceable author statement /// 16829 // lyase activity // inferred from electronic annotation /// 4056 // argininosuccinate lyase activity // inferred from electronic annotation	Urea cycle and metabolism of amino groups // KEGG /// Alanine and aspartate metabolism // KEGG /// Arginine and proline metabolism // KEGG
203270_at	2.08	0.0219799	DTYMK /// LOC653208	deoxythymidylate kinase (thymidylate kinase) /// similar to deoxythymidylate kinase (thymidylate kinase)	599355	6233 // dTDP biosynthesis // inferred from electronic annotation /// 6235 // dTTP biosynthesis // inferred from electronic annotation /// 6259 // DNA metabolism // not recorded /// 7049 // cell cycle // traceable author statement /// 8283 // cell proliferation // traceable author statement /// 9165 // nucleotide biosynthesis // inferred from electronic annotation	166 // nucleotide binding // inferred from electronic annotation /// 4798 // thymidylate kinase activity // traceable author statement /// 5524 // ATP binding // inferred from electronic annotation /// 16301 // kinase activity // inferred from electronic annotation /// 16740 // transferase activity // inferred from electronic annotation /// 4798 // thymidylate kinase activity // inferred from ele…	Pyrimidine metabolism // KEGG
216602_s_at	2.08	0.0296037	FARSLA	phenylalanine-tRNA synthetase-like, alpha subunit	23111	6412 // protein biosynthesis // inferred from electronic annotation /// 6432 // phenylalanyl-tRNA aminoacylation // inferred from electronic annotation /// 6418 // tRNA aminoacylation for protein translation // inferred from electronic annotation /// 6412 // protein biosynthesis // not recorded /// 6432 // phenylalanyl-tRNA aminoacylation // not recorded	166 // nucleotide binding // inferred from electronic annotation /// 4826 // phenylalanine-tRNA ligase activity // traceable author statement /// 5524 // ATP binding // inferred from electronic annotation /// 16874 // ligase activity // inferred from electronic annotation /// 4812 // aminoacyl-tRNA ligase activity // inferred from electronic annotation /// 4826 // phenylalanine-tRNA ligase activi…	---
200096_s_at	2.08	0.0408121	ATP6V0E	ATPase, H+ transporting, lysosomal 9kDa, V0 subunit e /// ATPase, H+ transporting, lysosomal 9kDa, V0 subunit e	484188	6811 // ion transport // inferred from electronic annotation /// 15986 // ATP synthesis coupled proton transport // inferred from electronic annotation /// 15992 // proton transport // traceable author statement /// 6810 // transport // inferred from electronic annotation /// 15992 // proton transport // inferred from electronic annotation	5215 // transporter activity // non-traceable author statement /// 16787 // hydrolase activity // inferred from electronic annotation /// 46933 // hydrogen-transporting ATP synthase activity, rotational mechanism // inferred from electronic annotation /// 46961 // hydrogen-transporting ATPase activity, rotational mechanism // traceable author statement /// 15078 // hydrogen ion transporter activi…	Oxidative phosphorylation // KEGG /// ATP synthesis // KEGG /// Photosynthesis // KEGG /// Flagellar assembly // KEGG /// Type III secretion system // KEGG /// Epithelial cell signaling in Helicobacter pylori // KEGG
201714_at	2.08	0.0433812	TUBG1	tubulin, gamma 1	279669	212 // meiotic spindle organization and biogenesis // inferred from sequence or structural similarity /// 7018 // microtubule-based movement // inferred from electronic annotation /// 7020 // microtubule nucleation // inferred from sequence or structural similarity /// 7052 // mitotic spindle organization and biogenesis // inferred from sequence or structural similarity /// 51258 // protein polym…	166 // nucleotide binding // inferred from electronic annotation /// 3924 // GTPase activity // inferred from electronic annotation /// 5200 // structural constituent of cytoskeleton // inferred from sequence or structural similarity /// 5515 // protein binding // inferred from physical interaction /// 5525 // GTP binding // inferred from electronic annotation /// 5515 // protein binding // infer…	---
203015_s_at	2.08	0.0469585	SSX2IP	synovial sarcoma, X breakpoint 2 interacting protein	22587	7155 // cell adhesion // inferred from electronic annotation	5515 // protein binding // inferred from electronic annotation	---
223455_at	2.07	0.00171673	TCHP	trichoplein, keratin filament binding	410924	---	5515 // protein binding // inferred from physical interaction	---
219188_s_at	2.07	0.00416283	LRP16	LRP16 protein	502814	---	---	---
209262_s_at	2.07	0.0173603	NR2F6	nuclear receptor subfamily 2, group F, member 6	466148	6350 // transcription // inferred from electronic annotation /// 6355 // regulation of transcription, DNA-dependent // inferred from electronic annotation /// 7165 // signal transduction // traceable author statement	3700 // transcription factor activity // inferred from electronic annotation /// 3707 // steroid hormone receptor activity // traceable author statement /// 4887 // thyroid hormone receptor activity // traceable author statement /// 8270 // zinc ion binding // inferred from electronic annotation /// 43565 // sequence-specific DNA binding // inferred from electronic annotation /// 46872 // metal i…	Nuclear_Receptors // GenMAPP
236081_at	2.07	0.0179147	---	Transcribed locus	21374	---	---	---
229250_at	2.07	0.0213133	TPCN2	two pore segment channel 2	131851	6811 // ion transport // inferred from electronic annotation /// 6810 // transport // inferred from electronic annotation	5216 // ion channel activity // inferred from electronic annotation	---
229934_at	2.07	0.0261856	---	Transcribed locus	38218	---	---	---
228661_s_at	2.07	0.0326593	---	CDNA FLJ11489 fis, clone HEMBA1001915	526415	---	---	---
230364_at	2.07	0.044339	CHPT1	choline phosphotransferase 1	293077	1558 // regulation of cell growth // inferred from sequence or structural similarity /// 6657 // CDP-choline pathway // inferred from sequence or structural similarity /// 6663 // platelet activating factor biosynthesis // inferred from sequence or structural similarity /// 6656 // phosphatidylcholine biosynthesis // inferred from direct assay /// 6663 // platelet activating factor biosynthesis /…	4142 // diacylglycerol cholinephosphotransferase activity // inferred from sequence or structural similarity /// 19992 // diacylglycerol binding // inferred from sequence or structural similarity /// 4142 // diacylglycerol cholinephosphotransferase activity // inferred from expression pattern /// 4142 // diacylglycerol cholinephosphotransferase activity // inferred from electronic annotation /// …	Aminophosphonate metabolism // KEGG /// Glycerophospholipid metabolism // KEGG /// Ether lipid metabolism // KEGG
218351_at	2.06	0.00352739	COMMD8	COMM domain containing 8	23956	---	---	---
202961_s_at	2.06	0.0040447	ATP5J2	ATP synthase, H+ transporting, mitochondrial F0 complex, subunit F2	521056	6754 // ATP biosynthesis // inferred from electronic annotation /// 6811 // ion transport // inferred from electronic annotation /// 15992 // proton transport // non-traceable author statement /// 6810 // transport // inferred from electronic annotation /// 15992 // proton transport // inferred from electronic annotation	15078 // hydrogen ion transporter activity // inferred from electronic annotation /// 46872 // metal ion binding // inferred from electronic annotation	Electron_Transport_Chain // GenMAPP /// Purine metabolism // KEGG
230370_x_at	2.06	0.00514114	STYXL1	serine/threonine/tyrosine interacting-like 1	11615	6470 // protein amino acid dephosphorylation // inferred from electronic annotation /// 7242 // intracellular signaling cascade // traceable author statement	8138 // protein tyrosine/serine/threonine phosphatase activity // inferred from electronic annotation /// 16787 // hydrolase activity // inferred from electronic annotation /// 4721 // phosphoprotein phosphatase activity // inferred from electronic annotation	---
208637_x_at	2.06	0.00557953	ACTN1	actinin, alpha 1	509765	42981 // regulation of apoptosis // non-traceable author statement /// 48041 // focal adhesion formation // inferred from mutant phenotype /// 51271 // negative regulation of cell motility // inferred from mutant phenotype	3779 // actin binding // inferred from electronic annotation /// 5178 // integrin binding // inferred from direct assay /// 5509 // calcium ion binding // inferred from electronic annotation /// 5515 // protein binding // inferred from physical interaction /// 17166 // vinculin binding // inferred from physical interaction	---
200957_s_at	2.06	0.00558014	SSRP1	structure specific recognition protein 1	523680	6260 // DNA replication // inferred from electronic annotation /// 6281 // DNA repair // inferred from electronic annotation /// 6350 // transcription // inferred from electronic annotation /// 6355 // regulation of transcription, DNA-dependent // inferred from electronic annotation /// 6974 // response to DNA damage stimulus // inferred from electronic annotation	3677 // DNA binding // traceable author statement /// 5515 // protein binding // inferred from physical interaction /// 3677 // DNA binding // inferred from electronic annotation	---
217968_at	2.06	0.00656372	TSSC1	tumor suppressing subtransferable candidate 1	502770	---	---	---
1555945_s_at	2.06	0.0114256	FAM120A	family with sequence similarity 120A	372003	6754 // ATP biosynthesis // inferred from electronic annotation /// 6810 // transport // inferred from electronic annotation /// 6811 // ion transport // inferred from electronic annotation /// 15986 // ATP synthesis coupled proton transport // inferred from electronic annotation /// 15992 // proton transport // inferred from electronic annotation /// 6091 // generation of precursor metabolites a…	5515 // protein binding // inferred from physical interaction /// 166 // nucleotide binding // inferred from electronic annotation /// 5524 // ATP binding // inferred from electronic annotation /// 8553 // hydrogen-exporting ATPase activity, phosphorylative mechanism // inferred from electronic annotation /// 15078 // hydrogen ion transporter activity // inferred from electronic annotation /// 16…	Electron_Transport_Chain // GenMAPP
201692_at	2.06	0.0121513	OPRS1	opioid receptor, sigma 1	522087	6696 // ergosterol biosynthesis // inferred from electronic annotation	247 // C-8 sterol isomerase activity // inferred from electronic annotation /// 4872 // receptor activity // inferred from electronic annotation /// 8144 // drug binding // traceable author statement	---
225051_at	2.06	0.0149401	EPB41	erythrocyte membrane protein band 4.1 (elliptocytosis 1, RH-linked)	175437	8015 // circulation // traceable author statement /// 30866 // cortical actin cytoskeleton organization and biogenesis // inferred from electronic annotation /// 30036 // actin cytoskeleton organization and biogenesis // non-traceable author statement	3779 // actin binding // inferred from electronic annotation /// 5200 // structural constituent of cytoskeleton // traceable author statement /// 5515 // protein binding // inferred from physical interaction /// 5198 // structural molecule activity // inferred from electronic annotation /// 5488 // binding // inferred from electronic annotation /// 8092 // cytoskeletal protein binding // inferred…	---
220418_at	2.06	0.0149554	IFT52 /// UBASH3A	intraflagellar transport 52 homolog (Chlamydomonas) /// ubiquitin associated and SH3 domain containing, A	473912	---	---	---
222417_s_at	2.06	0.0187708	SNX5	sorting nexin 5	590882	7242 // intracellular signaling cascade // inferred from electronic annotation /// 15031 // protein transport // inferred from electronic annotation /// 6810 // transport // inferred from electronic annotation	5515 // protein binding // inferred from electronic annotation /// 35091 // phosphoinositide binding // inferred from electronic annotation	---
225478_at	2.06	0.024785	---	CDNA FLJ39185 fis, clone OCBBF2004418	592881	---	---	---
204835_at	2.06	0.0260577	POLA	polymerase (DNA directed), alpha	567319	6260 // DNA replication // non-traceable author statement /// 6260 // DNA replication // inferred from electronic annotation	166 // nucleotide binding // inferred from electronic annotation /// 3677 // DNA binding // inferred from electronic annotation /// 3889 // alpha DNA polymerase activity // non-traceable author statement /// 8270 // zinc ion binding // inferred from electronic annotation /// 8408 // 3'-5' exonuclease activity // inferred from electronic annotation /// 16740 // transferase activity // inferred fro…	DNA_replication_Reactome // GenMAPP /// Nucleotide_Metabolism // GenMAPP /// Purine metabolism // KEGG /// Pyrimidine metabolism // KEGG /// DNA polymerase // KEGG
1555910_at	2.06	0.0293287	PTCD2	pentatricopeptide repeat domain 2	126906	---	5488 // binding // inferred from electronic annotation	---
219974_x_at	2.06	0.0367583	ECHDC1	enoyl Coenzyme A hydratase domain containing 1	486410	8152 // metabolism // inferred from electronic annotation	3824 // catalytic activity // inferred from electronic annotation	---
212189_s_at	2.05	8.63e-05	COG4	component of oligomeric golgi complex 4	208680	15031 // protein transport // inferred from electronic annotation /// 6810 // transport // inferred from electronic annotation	5515 // protein binding // inferred from physical interaction	---
222614_at	2.05	0.00419157	C21orf6	chromosome 21 open reading frame 6	34136	---	---	---
244052_at	2.05	0.00659189	CBR4	carbonyl reductase 4	481166	8152 // metabolism // inferred from electronic annotation /// 9239 // enterobactin biosynthesis // inferred from electronic annotation	16491 // oxidoreductase activity // inferred from electronic annotation /// 4316 // 3-oxoacyl-[acyl-carrier protein] reductase activity // inferred from electronic annotation /// 5525 // GTP binding // inferred from electronic annotation /// 8667 // 2,3-dihydro-2,3-dihydroxybenzoate dehydrogenase activity // inferred from electronic annotation	---
222503_s_at	2.05	0.00806571	WDR41	WD repeat domain 41	482573	---	---	---
203696_s_at	2.05	0.0173307	RFC2	replication factor C (activator 1) 2, 40kDa	---	6260 // DNA replication // inferred from electronic annotation	166 // nucleotide binding // inferred from electronic annotation /// 5515 // protein binding // inferred from physical interaction /// 5524 // ATP binding // traceable author statement /// 17111 // nucleoside-triphosphatase activity // inferred from electronic annotation /// 5524 // ATP binding // inferred from electronic annotation	DNA_replication_Reactome // GenMAPP
201830_s_at	2.05	0.0240905	NET1	neuroepithelial cell transforming gene 1	25155	1558 // regulation of cell growth // non-traceable author statement /// 7165 // signal transduction // traceable author statement /// 35023 // regulation of Rho protein signal transduction // inferred from electronic annotation	5089 // Rho guanyl-nucleotide exchange factor activity // inferred from electronic annotation /// 5085 // guanyl-nucleotide exchange factor activity // inferred from electronic annotation /// 5085 // guanyl-nucleotide exchange factor activity // traceable author statement	---
218866_s_at	2.05	0.0258403	POLR3K	polymerase (RNA) III (DNA directed) polypeptide K, 12.3 kDa	632223	6354 // RNA elongation // inferred from electronic annotation /// 6355 // regulation of transcription, DNA-dependent // inferred from electronic annotation /// 6383 // transcription from RNA polymerase III promoter // traceable author statement /// 6350 // transcription // inferred from electronic annotation /// 45449 // regulation of transcription // inferred from electronic annotation	3677 // DNA binding // inferred from electronic annotation /// 3702 // RNA polymerase II transcription factor activity // inferred from electronic annotation /// 3899 // DNA-directed RNA polymerase activity // traceable author statement /// 8270 // zinc ion binding // inferred from electronic annotation /// 16740 // transferase activity // inferred from electronic annotation /// 46872 // metal io…	RNA_transcription_Reactome // GenMAPP
242560_at	2.05	0.0258465	FANCD2	Fanconi anemia, complementation group D2	208388	6281 // DNA repair // inferred from electronic annotation /// 7049 // cell cycle // inferred from electronic annotation /// 6974 // response to DNA damage stimulus // inferred from electronic annotation	5515 // protein binding // inferred from physical interaction	---
219960_s_at	2.05	0.0391084	UCHL5	ubiquitin carboxyl-terminal hydrolase L5	591458	6511 // ubiquitin-dependent protein catabolism // inferred from electronic annotation /// 6512 // ubiquitin cycle // inferred from electronic annotation	4221 // ubiquitin thiolesterase activity // inferred from electronic annotation /// 5515 // protein binding // inferred from physical interaction /// 8234 // cysteine-type peptidase activity // inferred from electronic annotation /// 16787 // hydrolase activity // inferred from electronic annotation /// 8233 // peptidase activity // inferred from electronic annotation	---
208787_at	2.04	0.00295831	MRPL3	mitochondrial ribosomal protein L3	205163	6412 // protein biosynthesis // traceable author statement /// 6412 // protein biosynthesis // inferred from electronic annotation /// 6464 // protein modification // inferred from electronic annotation /// 6512 // ubiquitin cycle // inferred from electronic annotation	3723 // RNA binding // traceable author statement /// 3735 // structural constituent of ribosome // inferred from electronic annotation /// 5515 // protein binding // inferred from physical interaction /// 4842 // ubiquitin-protein ligase activity // inferred from electronic annotation /// 16874 // ligase activity // inferred from electronic annotation	---
205504_at	2.04	0.00298626	BTK	Bruton agammaglobulinemia tyrosine kinase	159494	6468 // protein amino acid phosphorylation // inferred from electronic annotation /// 6468 // protein amino acid phosphorylation // traceable author statement /// 7242 // intracellular signaling cascade // inferred from electronic annotation /// 7242 // intracellular signaling cascade // traceable author statement /// 7498 // mesoderm development // traceable author statement /// 8624 // inductio…	166 // nucleotide binding // inferred from electronic annotation /// 4713 // protein-tyrosine kinase activity // inferred from electronic annotation /// 4713 // protein-tyrosine kinase activity // traceable author statement /// 5515 // protein binding // inferred from physical interaction /// 5524 // ATP binding // inferred from electronic annotation /// 5524 // ATP binding // traceable author st…	Calcium signaling pathway // KEGG /// Cytokine-cytokine receptor interaction // KEGG /// Apoptosis // KEGG /// Dorso-ventral axis formation // KEGG /// Axon guidance // KEGG /// VEGF signaling pathway // KEGG /// Focal adhesion // KEGG /// Adherens junction // KEGG /// Gap junction // KEGG /// Hematopoietic cell lineage // KEGG /// Long-term depression // KEGG /// Regulation of actin cytoskeleton…
235071_at	2.04	0.00638817	LOC116143	monad	631877	---	5509 // calcium ion binding // inferred from electronic annotation	---
203327_at	2.04	0.00916043	IDE	insulin-degrading enzyme	500546	6508 // proteolysis // traceable author statement /// 7165 // signal transduction // non-traceable author statement /// 7267 // cell-cell signaling // not recorded /// 7548 // sex differentiation // traceable author statement /// 6508 // proteolysis // inferred from electronic annotation	4231 // insulysin activity // traceable author statement /// 4871 // signal transducer activity // traceable author statement /// 8270 // zinc ion binding // inferred from electronic annotation /// 46872 // metal ion binding // inferred from electronic annotation /// 4222 // metalloendopeptidase activity // inferred from electronic annotation /// 4231 // insulysin activity // inferred from electr…	Alzheimer's disease // KEGG
225609_at	2.04	0.00917289	GSR	glutathione reductase	271510	6118 // electron transport // inferred from electronic annotation /// 6749 // glutathione metabolism // inferred from electronic annotation /// 9613 // response to pest, pathogen or parasite // traceable author statement	4362 // glutathione-disulfide reductase activity // traceable author statement /// 15036 // disulfide oxidoreductase activity // inferred from electronic annotation /// 50660 // FAD binding // inferred from electronic annotation /// 4362 // glutathione-disulfide reductase activity // inferred from electronic annotation /// 16491 // oxidoreductase activity // inferred from electronic annotation //…	---
222386_s_at	2.04	0.0105236	COPZ1	coatomer protein complex, subunit zeta 1	505652	6886 // intracellular protein transport // inferred from electronic annotation /// 6890 // retrograde vesicle-mediated transport, Golgi to ER // traceable author statement /// 6891 // intra-Golgi vesicle-mediated transport // inferred from direct assay /// 6810 // transport // inferred from electronic annotation /// 15031 // protein transport // inferred from electronic annotation	---	---
211569_s_at	2.04	0.0109038	HADHSC	L-3-hydroxyacyl-Coenzyme A dehydrogenase, short chain	438289	6629 // lipid metabolism // inferred from electronic annotation /// 6631 // fatty acid metabolism // inferred from electronic annotation	3857 // 3-hydroxyacyl-CoA dehydrogenase activity // traceable author statement /// 16491 // oxidoreductase activity // inferred from electronic annotation /// 3857 // 3-hydroxyacyl-CoA dehydrogenase activity // inferred from electronic annotation	Fatty_Acid_Degradation // GenMAPP /// Fatty_Acid_Synthesis // GenMAPP /// Mitochondrial_fatty_acid_betaoxidation // GenMAPP
1555948_s_at	2.04	0.011864	FAM120A	family with sequence similarity 120A	372003	---	---	---
218230_at	2.04	0.0162121	ARFIP1	ADP-ribosylation factor interacting protein 1 (arfaptin 1)	416089	6886 // intracellular protein transport // inferred from direct assay /// 50708 // regulation of protein secretion // inferred from direct assay	---	---
222980_at	2.04	0.0162121	RAB10	RAB10, member RAS oncogene family	467960	6355 // regulation of transcription, DNA-dependent // inferred from electronic annotation /// 7264 // small GTPase mediated signal transduction // inferred from electronic annotation /// 15031 // protein transport // inferred from electronic annotation /// 6810 // transport // inferred from electronic annotation	166 // nucleotide binding // inferred from electronic annotation /// 5524 // ATP binding // inferred from electronic annotation /// 5525 // GTP binding // inferred from electronic annotation /// 8134 // transcription factor binding // inferred from electronic annotation	---
35160_at	2.04	0.019557	LDB1	LIM domain binding 1	454418	7275 // development // inferred from sequence or structural similarity /// 45892 // negative regulation of transcription, DNA-dependent // inferred from sequence or structural similarity /// 6355 // regulation of transcription, DNA-dependent // inferred from sequence or structural similarity /// 7275 // development // inferred from electronic annotation	3712 // transcription cofactor activity // inferred from electronic annotation /// 16564 // transcriptional repressor activity // inferred from sequence or structural similarity /// 30274 // LIM domain binding // inferred from sequence or structural similarity /// 30528 // transcription regulator activity // inferred from sequence or structural similarity	---
208913_at	2.04	0.020268	GGA2	golgi associated, gamma adaptin ear containing, ARF binding protein 2	460336	6461 // protein complex assembly // inferred from electronic annotation /// 6886 // intracellular protein transport // non-traceable author statement /// 6810 // transport // inferred from electronic annotation /// 6886 // intracellular protein transport // inferred from electronic annotation /// 15031 // protein transport // inferred from electronic annotation	5515 // protein binding // inferred from physical interaction /// 30306 // ADP-ribosylation factor binding // inferred from direct assay	---
224160_s_at	2.03	0.00288983	ACAD9	acyl-Coenzyme A dehydrogenase family, member 9	567482	6118 // electron transport // inferred from electronic annotation /// 8152 // metabolism // inferred from electronic annotation	3995 // acyl-CoA dehydrogenase activity // inferred from electronic annotation /// 50660 // FAD binding // inferred from electronic annotation /// 16491 // oxidoreductase activity // inferred from electronic annotation /// 16627 // oxidoreductase activity, acting on the CH-CH group of donors // inferred from electronic annotation	---
223212_at	2.03	0.00312773	ZDHHC16	zinc finger, DHHC-type containing 16	76662	6915 // apoptosis // inferred from electronic annotation	8270 // zinc ion binding // inferred from electronic annotation /// 8415 // acyltransferase activity // inferred from electronic annotation /// 16740 // transferase activity // inferred from electronic annotation /// 46872 // metal ion binding // inferred from electronic annotation	---
209478_at	2.03	0.00314021	---	---	---	---	---	---
218377_s_at	2.03	0.00389663	C21orf6	chromosome 21 open reading frame 6	34136	---	---	---
212499_s_at	2.03	0.0056004	C14orf111 /// C14orf32	chromosome 14 open reading frame 111 /// chromosome 14 open reading frame 32	594338	---	---	---
203500_at	2.03	0.00603025	GCDH	glutaryl-Coenzyme A dehydrogenase	532699	6118 // electron transport // inferred from electronic annotation /// 8152 // metabolism // inferred from electronic annotation	4361 // glutaryl-CoA dehydrogenase activity // traceable author statement /// 50660 // FAD binding // inferred from electronic annotation /// 3995 // acyl-CoA dehydrogenase activity // inferred from electronic annotation /// 4361 // glutaryl-CoA dehydrogenase activity // inferred from electronic annotation /// 16491 // oxidoreductase activity // inferred from electronic annotation /// 16627 // ox…	Fatty acid metabolism // KEGG /// Lysine degradation // KEGG /// Tryptophan metabolism // KEGG /// Benzoate degradation via CoA ligation // KEGG
201014_s_at	2.03	0.00678631	PAICS	phosphoribosylaminoimidazole carboxylase, phosphoribosylaminoimidazole succinocarboxamide synthetase	518774	6164 // purine nucleotide biosynthesis // inferred from electronic annotation /// 6189 // 'de novo' IMP biosynthesis // inferred from electronic annotation /// 9113 // purine base biosynthesis // traceable author statement	4638 // phosphoribosylaminoimidazole carboxylase activity // inferred from electronic annotation /// 4639 // phosphoribosylaminoimidazolesuccinocarboxamide synthase activity // traceable author statement /// 5524 // ATP binding // inferred from electronic annotation /// 16829 // lyase activity // inferred from electronic annotation /// 16874 // ligase activity // inferred from electronic annotati…	Purine metabolism // KEGG /// Purine metabolism // KEGG
209444_at	2.03	0.00824089	RAP1GDS1	RAP1, GTP-GDP dissociation stimulator 1	132858	7155 // cell adhesion // inferred from electronic annotation	5096 // GTPase activator activity // non-traceable author statement /// 5198 // structural molecule activity // inferred from electronic annotation /// 5488 // binding // inferred from electronic annotation /// 5515 // protein binding // inferred from electronic annotation /// 5096 // GTPase activator activity // inferred from electronic annotation	---
200039_s_at	2.03	0.00985532	PSMB2	proteasome (prosome, macropain) subunit, beta type, 2 /// proteasome (prosome, macropain) subunit, beta type, 2	471441	6511 // ubiquitin-dependent protein catabolism // inferred from electronic annotation /// 19538 // protein metabolism // inferred from electronic annotation	4298 // threonine endopeptidase activity // inferred from electronic annotation /// 4175 // endopeptidase activity // inferred from electronic annotation /// 8233 // peptidase activity // inferred from electronic annotation /// 16787 // hydrolase activity // inferred from electronic annotation /// 5488 // binding // inferred from electronic annotation /// 5506 // iron ion binding // inferred from…	Proteasome_Degradation // GenMAPP /// Proteasome // KEGG
212048_s_at	2.03	0.0138862	YARS	tyrosyl-tRNA synthetase	213264	6412 // protein biosynthesis // inferred from electronic annotation /// 6437 // tyrosyl-tRNA aminoacylation // traceable author statement /// 6915 // apoptosis // traceable author statement /// 6928 // cell motility // not recorded /// 6418 // tRNA aminoacylation for protein translation // inferred from electronic annotation /// 6437 // tyrosyl-tRNA aminoacylation // inferred from electronic anno…	49 // tRNA binding // inferred from electronic annotation /// 166 // nucleotide binding // inferred from electronic annotation /// 4831 // tyrosine-tRNA ligase activity // traceable author statement /// 4871 // signal transducer activity // non-traceable author statement /// 5153 // interleukin-8 receptor binding // traceable author statement /// 5524 // ATP binding // inferred from electronic an…	Phenylalanine, tyrosine and tryptophan biosynthesis // KEGG /// Aminoacyl-tRNA biosynthesis // KEGG
224523_s_at	2.03	0.0236603	C3orf26	chromosome 3 open reading frame 26 /// chromosome 3 open reading frame 26	567617	---	---	---
201923_at	2.03	0.0255835	PRDX4	peroxiredoxin 4	83383	7252 // I-kappaB phosphorylation // traceable author statement	8379 // thioredoxin peroxidase activity // traceable author statement /// 16491 // oxidoreductase activity // inferred from electronic annotation /// 51920 // peroxiredoxin activity // inferred from electronic annotation /// 4601 // peroxidase activity // inferred from electronic annotation /// 16209 // antioxidant activity // inferred from electronic annotation	---
200783_s_at	2.02	0.00231169	STMN1	stathmin 1/oncoprotein 18	581990	7019 // microtubule depolymerization // inferred from direct assay /// 7052 // mitotic spindle organization and biogenesis // inferred from direct assay /// 7242 // intracellular signaling cascade // inferred from electronic annotation /// 7242 // intracellular signaling cascade // traceable author statement /// 7165 // signal transduction // non-traceable author statement	4871 // signal transducer activity // traceable author statement /// 15631 // tubulin binding // inferred from direct assay	---
212919_at	2.02	0.00322142	DCP2	DCP2 decapping enzyme homolog (S. cerevisiae)	443875	184 // mRNA catabolism, nonsense-mediated decay // inferred from electronic annotation	3723 // RNA binding // inferred from electronic annotation /// 16787 // hydrolase activity // inferred from electronic annotation /// 30145 // manganese ion binding // inferred from electronic annotation /// 46872 // metal ion binding // inferred from electronic annotation	---
203714_s_at	2.02	0.00628683	TBCE	tubulin-specific chaperone e	---	6457 // protein folding // inferred from electronic annotation /// 7025 // beta-tubulin folding // traceable author statement	51082 // unfolded protein binding // inferred from electronic annotation /// 51087 // chaperone binding // traceable author statement	---
1559946_s_at	2.02	0.00900986	RUVBL2	RuvB-like 2 (E. coli)	515846	1558 // regulation of cell growth // inferred from electronic annotation /// 6281 // DNA repair // traceable author statement /// 6310 // DNA recombination // traceable author statement /// 6350 // transcription // inferred from electronic annotation /// 6355 // regulation of transcription, DNA-dependent // inferred from electronic annotation /// 6457 // protein folding // traceable author statem…	166 // nucleotide binding // inferred from electronic annotation /// 3684 // damaged DNA binding // inferred from electronic annotation /// 4003 // ATP-dependent DNA helicase activity // traceable author statement /// 5524 // ATP binding // inferred from electronic annotation /// 16787 // hydrolase activity // inferred from electronic annotation /// 16887 // ATPase activity // inferred from direc…	---
221896_s_at	2.02	0.0311635	HIGD1A	HIG1 domain family, member 1A	7917	6412 // protein biosynthesis // inferred from electronic annotation /// 6412 // protein biosynthesis // non-traceable author statement	3735 // structural constituent of ribosome // inferred from electronic annotation /// 3735 // structural constituent of ribosome // traceable author statement	Ribosomal_Proteins // GenMAPP /// Ribosomal_Proteins // GenMAPP
217917_s_at	2.01	0.000233665	DYNLRB1	dynein, light chain, roadblock-type 1	531876	7018 // microtubule-based movement // non-traceable author statement /// 7632 // visual behavior // inferred from sequence or structural similarity /// 8090 // retrograde axon cargo transport // inferred from sequence or structural similarity	3777 // microtubule motor activity // non-traceable author statement /// 5515 // protein binding // non-traceable author statement /// 5515 // protein binding // inferred from physical interaction /// 3774 // motor activity // inferred from electronic annotation	---
209100_at	2.01	0.00162024	IFRD2	interferon-related developmental regulator 2	315177	8283 // cell proliferation // inferred from sequence or structural similarity /// 30154 // cell differentiation // inferred from sequence or structural similarity /// 30154 // cell differentiation // inferred from electronic annotation	5488 // binding // inferred from electronic annotation	---
221932_s_at	2.01	0.00251725	GLRX5	glutaredoxin 5 homolog (S. cerevisiae)	532683	45454 // cell redox homeostasis // inferred from electronic annotation	9055 // electron carrier activity // inferred from electronic annotation /// 15035 // protein disulfide oxidoreductase activity // inferred from electronic annotation	---
222581_at	2.01	0.00406354	XPR1	xenotropic and polytropic retrovirus receptor	227656	7186 // G-protein coupled receptor protein signaling pathway // traceable author statement	4872 // receptor activity // inferred from electronic annotation /// 4930 // G-protein coupled receptor activity // traceable author statement /// 4872 // receptor activity // traceable author statement /// 4888 // transmembrane receptor activity // traceable author statement	---
214794_at	2.01	0.00551091	DLST	dihydrolipoamide S-succinyltransferase (E2 component of 2-oxo-glutarate complex)	525459	6091 // generation of precursor metabolites and energy // traceable author statement /// 6099 // tricarboxylic acid cycle // inferred from electronic annotation /// 8152 // metabolism // inferred from electronic annotation	4149 // dihydrolipoyllysine-residue succinyltransferase activity // inferred from electronic annotation /// 8415 // acyltransferase activity // inferred from electronic annotation /// 16740 // transferase activity // inferred from electronic annotation /// 31405 // lipoic acid binding // inferred from electronic annotation	Krebs-TCA_Cycle // GenMAPP /// Krebs-TCA_Cycle // GenMAPP /// Krebs-TCA_Cycle // GenMAPP /// Krebs-TCA_Cycle // GenMAPP /// Citrate cycle (TCA cycle) // KEGG /// Lysine degradation // KEGG
214170_x_at	2.01	0.00614998	FH	fumarate hydratase	498239	6099 // tricarboxylic acid cycle // inferred from electronic annotation /// 6106 // fumarate metabolism // traceable author statement /// 7049 // cell cycle // inferred from electronic annotation /// 45786 // negative regulation of progression through cell cycle // inferred from electronic annotation /// 6106 // fumarate metabolism // inferred from electronic annotation	4333 // fumarate hydratase activity // traceable author statement /// 16829 // lyase activity // inferred from electronic annotation /// 3824 // catalytic activity // inferred from electronic annotation /// 4333 // fumarate hydratase activity // inferred from electronic annotation	Krebs-TCA_Cycle // GenMAPP /// Citrate cycle (TCA cycle) // KEGG /// Reductive carboxylate cycle (CO2 fixation) // KEGG
225201_s_at	2.01	0.00915724	MRPL14	mitochondrial ribosomal protein L14	311190	6412 // protein biosynthesis // inferred from electronic annotation	3735 // structural constituent of ribosome // inferred from electronic annotation	---
226488_at	2.01	0.0107398	RCCD1	RCC1 domain containing 1	366401	---	---	---
204695_at	2.01	0.0139386	CDC25A	cell division cycle 25A	437705	79 // regulation of cyclin-dependent protein kinase activity // traceable author statement /// 6470 // protein amino acid dephosphorylation // inferred from electronic annotation /// 7049 // cell cycle // inferred from electronic annotation /// 7067 // mitosis // inferred from electronic annotation /// 8283 // cell proliferation // traceable author statement /// 51301 // cell division // inferred…	4725 // protein tyrosine phosphatase activity // inferred from electronic annotation /// 16787 // hydrolase activity // inferred from electronic annotation /// 4721 // phosphoprotein phosphatase activity // inferred from electronic annotation	Cell_cycle_KEGG // GenMAPP /// G1_to_S_cell_cycle_Reactome // GenMAPP /// Cell adhesion molecules (CAMs) // KEGG /// Adherens junction // KEGG /// Jak-STAT signaling pathway // KEGG /// T cell receptor signaling pathway // KEGG /// B cell receptor signaling pathway // KEGG /// Leukocyte transendothelial migration // KEGG /// Insulin signaling pathway // KEGG /// Adipocytokine signaling pathway //…
220865_s_at	2.01	0.0159514	PDSS1	prenyl (decaprenyl) diphosphate synthase, subunit 1	558468	6744 // ubiquinone biosynthesis // inferred from direct assay /// 8299 // isoprenoid biosynthesis // inferred from direct assay /// 8299 // isoprenoid biosynthesis // inferred from electronic annotation /// 6744 // ubiquinone biosynthesis // inferred from electronic annotation	10 // trans-hexaprenyltranstransferase activity // inferred from direct assay /// 16740 // transferase activity // inferred from electronic annotation /// 46982 // protein heterodimerization activity // inferred from direct assay	---
237403_at	2.01	0.0166172	GFI1B	growth factor independent 1B (potential regulator of CDKN1A, translocated in CML)	553160	114 // G1-specific transcription in mitotic cell cycle // traceable author statement /// 122 // negative regulation of transcription from RNA polymerase II promoter // traceable author statement /// 8283 // cell proliferation // traceable author statement	3676 // nucleic acid binding // inferred from electronic annotation /// 3704 // specific RNA polymerase II transcription factor activity // traceable author statement /// 8270 // zinc ion binding // inferred from electronic annotation /// 46872 // metal ion binding // inferred from electronic annotation /// 5515 // protein binding // inferred from physical interaction	---
217772_s_at	2.01	0.016849	MTCH2	mitochondrial carrier homolog 2 (C. elegans)	269944	6810 // transport // inferred from electronic annotation /// 6470 // protein amino acid dephosphorylation // inferred from electronic annotation	5488 // binding // inferred from electronic annotation /// 5515 // protein binding // inferred from electronic annotation /// 4721 // phosphoprotein phosphatase activity // inferred from electronic annotation /// 4725 // protein tyrosine phosphatase activity // inferred from electronic annotation /// 8138 // protein tyrosine/serine/threonine phosphatase activity // inferred from electronic annota…	Electron_Transport_Chain // GenMAPP
212511_at	2.01	0.0215106	PICALM	phosphatidylinositol binding clathrin assembly protein	163893	6461 // protein complex assembly // traceable author statement /// 6898 // receptor mediated endocytosis // inferred from direct assay /// 6897 // endocytosis // inferred from electronic annotation /// 16192 // vesicle-mediated transport // traceable author statement /// 6461 // protein complex assembly // inferred from sequence or structural similarity /// 6898 // receptor mediated endocytosis /…	5543 // phospholipid binding // inferred from electronic annotation /// 5545 // phosphatidylinositol binding // inferred from sequence or structural similarity /// 30276 // clathrin binding // inferred from direct assay /// 30276 // clathrin binding // inferred from sequence or structural similarity	---
223180_s_at	2.01	0.0221661	C18orf55	chromosome 18 open reading frame 55	532835	6605 // protein targeting // inferred from electronic annotation /// 15031 // protein transport // inferred from electronic annotation /// 6810 // transport // inferred from electronic annotation	---	---
212193_s_at	2.01	0.0457968	LARP1	La ribonucleoprotein domain family, member 1	292078	---	3723 // RNA binding // inferred from electronic annotation	---
227313_at	2	0.000397877	MGC40499	PRotein Associated with Tlr4	632293	---	---	---
220094_s_at	2	0.00127104	C6orf79	chromosome 6 open reading frame 79	214043	---	---	---
225943_at	2	0.00152226	NLN	neurolysin (metallopeptidase M3 family)	247460	6508 // proteolysis // inferred from electronic annotation	4222 // metalloendopeptidase activity // inferred from electronic annotation /// 8270 // zinc ion binding // inferred from electronic annotation /// 16787 // hydrolase activity // inferred from electronic annotation /// 46872 // metal ion binding // inferred from electronic annotation /// 8237 // metallopeptidase activity // inferred from electronic annotation /// 8233 // peptidase activity // in…	---
218105_s_at	2	0.00356492	MRPL4	mitochondrial ribosomal protein L4	279652	6412 // protein biosynthesis // inferred from electronic annotation	3735 // structural constituent of ribosome // inferred from electronic annotation	---
201172_x_at	2	0.00356764	ATP6V0E	ATPase, H+ transporting, lysosomal 9kDa, V0 subunit e	484188	6811 // ion transport // inferred from electronic annotation /// 15986 // ATP synthesis coupled proton transport // inferred from electronic annotation /// 15992 // proton transport // traceable author statement /// 6810 // transport // inferred from electronic annotation /// 15992 // proton transport // inferred from electronic annotation	5215 // transporter activity // non-traceable author statement /// 16787 // hydrolase activity // inferred from electronic annotation /// 46933 // hydrogen-transporting ATP synthase activity, rotational mechanism // inferred from electronic annotation /// 46961 // hydrogen-transporting ATPase activity, rotational mechanism // traceable author statement /// 15078 // hydrogen ion transporter activi…	Oxidative phosphorylation // KEGG /// ATP synthesis // KEGG /// Photosynthesis // KEGG /// Flagellar assembly // KEGG /// Type III secretion system // KEGG /// Epithelial cell signaling in Helicobacter pylori // KEGG
226009_at	2	0.00399971	RP11-529I10.4	deleted in a mouse model of primary ciliary dyskinesia	555926	---	---	---
212228_s_at	2	0.00628683	COQ9	coenzyme Q9 homolog (S. cerevisiae)	513632	6744 // ubiquinone biosynthesis // inferred from electronic annotation	---	---
224509_s_at	2	0.00852459	RTN4IP1	reticulon 4 interacting protein 1 /// reticulon 4 interacting protein 1	155839	---	8270 // zinc ion binding // inferred from electronic annotation /// 16491 // oxidoreductase activity // inferred from electronic annotation	---
203454_s_at	2	0.00893545	ATOX1	ATX1 antioxidant protein 1 homolog (yeast)	125213	6457 // protein folding // inferred from electronic annotation /// 6811 // ion transport // inferred from electronic annotation /// 6825 // copper ion transport // traceable author statement /// 6878 // copper ion homeostasis // traceable author statement /// 6979 // response to oxidative stress // traceable author statement /// 30001 // metal ion transport // inferred from electronic annotation …	5375 // copper ion transporter activity // inferred from electronic annotation /// 5507 // copper ion binding // traceable author statement /// 46872 // metal ion binding // inferred from electronic annotation /// 51082 // unfolded protein binding // inferred from electronic annotation /// 5507 // copper ion binding // inferred from electronic annotation	---
213129_s_at	2	0.0120359	GCSH /// LOC653763 /// LOC654085	glycine cleavage system protein H (aminomethyl carrier) /// similar to Glycine cleavage system H protein, mitochondrial precursor /// similar to Glycine cleavage system H protein, mitochondrial precursor	575922	6546 // glycine catabolism // traceable author statement /// 6546 // glycine catabolism // inferred from electronic annotation	4047 // aminomethyltransferase activity // traceable author statement /// 31405 // lipoic acid binding // inferred from electronic annotation	---
225454_at	2	0.0151905	CCDC124	coiled-coil domain containing 124	100043	---	---	---
204576_s_at	2	0.0250258	CLUAP1	clusterin associated protein 1	155995	---	5515 // protein binding // inferred from physical interaction	---
1553138_a_at	2	0.0257188	ANKRD41	ankyrin repeat domain 41	379097	---	---	---
226594_at	2	0.0288873	ENTPD5	Ectonucleoside triphosphate diphosphohydrolase 5	131555	---	287 // magnesium ion binding // inferred from electronic annotation /// 5509 // calcium ion binding // inferred from electronic annotation /// 16787 // hydrolase activity // inferred from electronic annotation /// 17110 // nucleoside-diphosphatase activity // inferred from electronic annotation	---
207122_x_at	1.99	0.000663895	SULT1A2	sulfotransferase family, cytosolic, 1A, phenol-preferring, member 2	546304	6584 // catecholamine metabolism // inferred from electronic annotation /// 6629 // lipid metabolism // inferred from electronic annotation /// 8202 // steroid metabolism // inferred from electronic annotation /// 9309 // amine biosynthesis // traceable author statement	4062 // aryl sulfotransferase activity // inferred from electronic annotation /// 16740 // transferase activity // inferred from electronic annotation /// 8146 // sulfotransferase activity // inferred from electronic annotation /// 8146 // sulfotransferase activity // traceable author statement	Sulfur metabolism // KEGG
208074_s_at	1.99	0.00126485	AP2S1	adaptor-related protein complex 2, sigma 1 subunit	119591	6810 // transport // inferred from electronic annotation /// 6886 // intracellular protein transport // inferred from electronic annotation /// 30100 // regulation of endocytosis // traceable author statement /// 48268 // clathrin cage assembly // traceable author statement /// 16260 // selenocysteine biosynthesis // non-traceable author statement	8565 // protein transporter activity // non-traceable author statement /// 3824 // catalytic activity // inferred from electronic annotation /// 4756 // selenide, water dikinase activity // inferred from electronic annotation /// 5524 // ATP binding // inferred from electronic annotation /// 16301 // kinase activity // inferred from electronic annotation /// 166 // nucleotide binding // inferred …	---
205292_s_at	1.99	0.0020877	HNRPA2B1	heterogeneous nuclear ribonucleoprotein A2/B1	487774	398 // nuclear mRNA splicing, via spliceosome // Unknown	166 // nucleotide binding // inferred from electronic annotation /// 3723 // RNA binding // inferred from electronic annotation /// 3723 // RNA binding // traceable author statement /// 5515 // protein binding // inferred from physical interaction /// 3676 // nucleic acid binding // inferred from electronic annotation	mRNA_processing_Reactome // GenMAPP /// mRNA_processing_Reactome // GenMAPP
215273_s_at	1.99	0.00255214	TADA3L	transcriptional adaptor 3 (NGG1 homolog, yeast)-like	386390	74 // regulation of progression through cell cycle // non-traceable author statement /// 6350 // transcription // inferred from electronic annotation /// 6357 // regulation of transcription from RNA polymerase II promoter // traceable author statement /// 6355 // regulation of transcription, DNA-dependent // inferred from electronic annotation	3700 // transcription factor activity // traceable author statement /// 5515 // protein binding // inferred from physical interaction	---
203036_s_at	1.99	0.00485709	MTSS1	metastasis suppressor 1	336994	6928 // cell motility // non-traceable author statement /// 7049 // cell cycle // inferred from electronic annotation /// 7155 // cell adhesion // non-traceable author statement /// 7169 // transmembrane receptor protein tyrosine kinase signaling pathway // traceable author statement /// 7399 // nervous system development // inferred from sequence or structural similarity /// 7517 // muscle devel…	3785 // actin monomer binding // inferred from direct assay /// 5102 // receptor binding // inferred from physical interaction /// 3779 // actin binding // inferred from electronic annotation	---
223114_at	1.99	0.00488358	COQ5	coenzyme Q5 homolog, methyltransferase (S. cerevisiae)	17250	6744 // ubiquinone biosynthesis // inferred from electronic annotation	8168 // methyltransferase activity // inferred from electronic annotation /// 16740 // transferase activity // inferred from electronic annotation	---
222993_at	1.99	0.0118898	MRPL37	mitochondrial ribosomal protein L37	584908	6412 // protein biosynthesis // non-traceable author statement	3735 // structural constituent of ribosome // non-traceable author statement /// 45182 // translation regulator activity // non-traceable author statement	---
213896_x_at	1.99	0.0120539	KIAA0974	KIAA0974	408577	6457 // protein folding // inferred from electronic annotation	31072 // heat shock protein binding // inferred from electronic annotation /// 51082 // unfolded protein binding // inferred from electronic annotation	---
226330_s_at	1.99	0.012669	FAM48A	family with sequence similarity 48, member A	435815	6464 // protein modification // inferred from electronic annotation	---	---
212829_at	1.99	0.0130681	---	CDNA FLJ13267 fis, clone OVARC1000964 /// CDNA FLJ13267 fis, clone OVARC1000964	57079	---	---	---
228597_at	1.99	0.0133521	C21orf45	chromosome 21 open reading frame 45	190518	---	---	---
33307_at	1.99	0.0157304	CTA-126B4.3	CGI-96 protein	534041	---	166 // nucleotide binding // inferred from electronic annotation /// 3723 // RNA binding // inferred from electronic annotation /// 3676 // nucleic acid binding // inferred from electronic annotation	---
220189_s_at	1.99	0.0269666	MGAT4B	mannosyl (alpha-1,3-)-glycoprotein beta-1,4-N-acetylglucosaminyltransferase, isozyme B	567419	5975 // carbohydrate metabolism // inferred from electronic annotation /// 6491 // N-glycan processing // traceable author statement	16758 // transferase activity, transferring hexosyl groups // inferred from electronic annotation /// 16740 // transferase activity // inferred from electronic annotation /// 16757 // transferase activity, transferring glycosyl groups // inferred from electronic annotation /// 8454 // alpha-1,3-mannosylglycoprotein 4-beta-N-acetylglucosaminyltransferase activity // traceable author statement	N-Glycan biosynthesis // KEGG /// Glycan structures - biosynthesis 1 // KEGG
209714_s_at	1.99	0.0282695	CDKN3	cyclin-dependent kinase inhibitor 3 (CDK2-associated dual specificity phosphatase)	84113	79 // regulation of cyclin-dependent protein kinase activity // traceable author statement /// 82 // G1/S transition of mitotic cell cycle // traceable author statement /// 6470 // protein amino acid dephosphorylation // inferred from electronic annotation /// 7049 // cell cycle // inferred from electronic annotation /// 7050 // cell cycle arrest // traceable author statement /// 8285 // negative…	4725 // protein tyrosine phosphatase activity // inferred from electronic annotation /// 8138 // protein tyrosine/serine/threonine phosphatase activity // traceable author statement /// 16787 // hydrolase activity // inferred from electronic annotation /// 4721 // phosphoprotein phosphatase activity // inferred from electronic annotation /// 16301 // kinase activity // inferred from electronic an…	---
226996_at	1.99	0.0493952	LYCAT	lysocardiolipin acyltransferase	468048	8152 // metabolism // inferred from electronic annotation	8415 // acyltransferase activity // inferred from electronic annotation	---
227291_s_at	1.98	0.000218024	BOLA3	bolA-like 3 (E. coli)	61472	---	30528 // transcription regulator activity // inferred from electronic annotation	---
209391_at	1.98	0.00130776	DPM2	dolichyl-phosphate mannosyltransferase polypeptide 2, regulatory subunit	108973	6506 // GPI anchor biosynthesis // traceable author statement /// 9059 // macromolecule biosynthesis // inferred from electronic annotation /// 18406 // protein amino acid C-linked glycosylation via 2'-alpha-mannosyl-L-tryptophan // traceable author statement /// 35269 // protein amino acid O-linked mannosylation // traceable author statement /// 6486 // protein amino acid glycosylation // tracea…	5515 // protein binding // inferred from physical interaction /// 16757 // transferase activity, transferring glycosyl groups // inferred from electronic annotation /// 16740 // transferase activity // inferred from electronic annotation	---
209870_s_at	1.98	0.00406837	APBA2	amyloid beta (A4) precursor protein-binding, family A, member 2 (X11-like)	525718	7399 // nervous system development // traceable author statement /// 15031 // protein transport // inferred from electronic annotation /// 6810 // transport // inferred from electronic annotation	5515 // protein binding // inferred from physical interaction /// 5515 // protein binding // inferred from electronic annotation /// 5515 // protein binding // traceable author statement	---
212315_s_at	1.98	0.00436345	NUP210	nucleoporin 210kDa	475525	6397 // mRNA processing // inferred from electronic annotation /// 6406 // mRNA export from nucleus // inferred from electronic annotation /// 6605 // protein targeting // inferred from electronic annotation /// 15031 // protein transport // inferred from electronic annotation /// 6810 // transport // inferred from electronic annotation	5515 // protein binding // inferred from physical interaction	---
201193_at	1.98	0.00489819	IDH1	isocitrate dehydrogenase 1 (NADP+), soluble	11223	5975 // carbohydrate metabolism // traceable author statement /// 6092 // main pathways of carbohydrate metabolism // inferred from electronic annotation /// 6097 // glyoxylate cycle // inferred from electronic annotation /// 6099 // tricarboxylic acid cycle // inferred from electronic annotation /// 6102 // isocitrate metabolism // traceable author statement /// 8152 // metabolism // inferred fr…	4450 // isocitrate dehydrogenase (NADP+) activity // inferred from electronic annotation /// 4450 // isocitrate dehydrogenase (NADP+) activity // traceable author statement /// 16491 // oxidoreductase activity // inferred from electronic annotation /// 16652 // oxidoreductase activity, acting on NADH or NADPH, NAD or NADP as acceptor // inferred from electronic annotation	Citrate cycle (TCA cycle) // KEGG /// Glutathione metabolism // KEGG /// Reductive carboxylate cycle (CO2 fixation) // KEGG
232103_at	1.98	0.00517613	BPNT1	3'(2'), 5'-bisphosphate nucleotidase 1	406134	6139 // nucleobase, nucleoside, nucleotide and nucleic acid metabolism // traceable author statement /// 7399 // nervous system development // traceable author statement	287 // magnesium ion binding // inferred from electronic annotation /// 4437 // inositol or phosphatidylinositol phosphatase activity // inferred from electronic annotation /// 8441 // 3'(2'),5'-bisphosphate nucleotidase activity // traceable author statement /// 16787 // hydrolase activity // inferred from electronic annotation /// 31403 // lithium ion binding // inferred from electronic annotat…	Sulfur metabolism // KEGG
200658_s_at	1.98	0.00653908	PHB	prohibitin	514303	74 // regulation of progression through cell cycle // inferred from direct assay /// 6260 // DNA replication // inferred from electronic annotation /// 7165 // signal transduction // traceable author statement /// 8285 // negative regulation of cell proliferation // non-traceable author statement /// 16481 // negative regulation of transcription // inferred from direct assay /// 16575 // histone …	5515 // protein binding // inferred from physical interaction /// 16563 // transcriptional activator activity // inferred from direct assay /// 16564 // transcriptional repressor activity // inferred from direct assay	---
200852_x_at	1.98	0.00730119	GNB2	guanine nucleotide binding protein (G protein), beta polypeptide 2	185172	7165 // signal transduction // inferred from electronic annotation	4871 // signal transducer activity // inferred from electronic annotation	G_Protein_Signaling // GenMAPP /// Calcium_regulation_in_cardiac_cells // GenMAPP /// Smooth_muscle_contraction // GenMAPP /// G_Protein_Signaling // GenMAPP /// Calcium_regulation_in_cardiac_cells // GenMAPP /// Smooth_muscle_contraction // GenMAPP
201479_at	1.98	0.00829419	DKC1	dyskeratosis congenita 1, dyskerin	4747	74 // regulation of progression through cell cycle // traceable author statement /// 6364 // rRNA processing // traceable author statement /// 7004 // telomere maintenance via telomerase // traceable author statement /// 8283 // cell proliferation // traceable author statement /// 6364 // rRNA processing // inferred from electronic annotation /// 6396 // RNA processing // inferred from electronic…	3720 // telomerase activity // inferred from direct assay /// 3723 // RNA binding // traceable author statement /// 4730 // pseudouridylate synthase activity // inferred from electronic annotation /// 16853 // isomerase activity // inferred from electronic annotation /// 3723 // RNA binding // inferred from electronic annotation	---
214484_s_at	1.98	0.00876125	OPRS1	opioid receptor, sigma 1	522087	6696 // ergosterol biosynthesis // inferred from electronic annotation	247 // C-8 sterol isomerase activity // inferred from electronic annotation /// 4872 // receptor activity // inferred from electronic annotation /// 8144 // drug binding // traceable author statement	---
222756_s_at	1.98	0.00918882	ARRB1	arrestin, beta 1	503284	7165 // signal transduction // traceable author statement /// 7600 // sensory perception // inferred from electronic annotation /// 7165 // signal transduction // inferred from electronic annotation /// 50896 // response to stimulus // inferred from electronic annotation	4857 // enzyme inhibitor activity // traceable author statement	Calcium_regulation_in_cardiac_cells // GenMAPP /// Smooth_muscle_contraction // GenMAPP
218026_at	1.98	0.01031	CCDC56	coiled-coil domain containing 56	16059	---	---	---
209490_s_at	1.98	0.0104227	PPT2	palmitoyl-protein thioesterase 2	332138	6464 // protein modification // non-traceable author statement /// 1701 // embryonic development (sensu Mammalia) // inferred from sequence or structural similarity /// 6464 // protein modification // inferred from electronic annotation	8474 // palmitoyl-(protein) hydrolase activity // non-traceable author statement /// 16787 // hydrolase activity // inferred from electronic annotation /// 5509 // calcium ion binding // inferred from sequence or structural similarity /// 5509 // calcium ion binding // inferred from electronic annotation /// 8474 // palmitoyl-(protein) hydrolase activity // inferred from electronic annotation ///…	Fatty acid elongation in mitochondria // KEGG
209001_s_at	1.98	0.0175179	ANAPC13	anaphase promoting complex subunit 13	106909	---	---	---
227167_s_at	1.98	0.022431	RASSF3	Ras association (RalGDS/AF-6) domain family 3	61426	7165 // signal transduction // inferred from electronic annotation	5515 // protein binding // inferred from electronic annotation	---
201136_at	1.98	0.0344528	PLP2	proteolipid protein 2 (colonic epithelium-enriched)	77422	6811 // ion transport // traceable author statement /// 6935 // chemotaxis // non-traceable author statement /// 19221 // cytokine and chemokine mediated signaling pathway // non-traceable author statement	5515 // protein binding // inferred from physical interaction /// 15075 // ion transporter activity // traceable author statement /// 19956 // chemokine binding // inferred from physical interaction	---
200661_at	1.98	0.0492627	PPGB	protective protein for beta-galactosidase (galactosialidosis)	517076	6508 // proteolysis // inferred from electronic annotation /// 6886 // intracellular protein transport // traceable author statement	4185 // serine carboxypeptidase activity // inferred from electronic annotation /// 4186 // carboxypeptidase C activity // inferred from electronic annotation /// 5478 // intracellular transporter activity // traceable author statement /// 8047 // enzyme activator activity // traceable author statement /// 8233 // peptidase activity // inferred from electronic annotation /// 4180 // carboxypeptid…	---
216903_s_at	1.97	0.00167941	CBARA1	calcium binding atopy-related autoantigen 1	524367	6952 // defense response // traceable author statement	5509 // calcium ion binding // inferred from electronic annotation	---
218270_at	1.97	0.00202983	MRPL24	mitochondrial ribosomal protein L24	418233	6412 // protein biosynthesis // inferred from electronic annotation	3735 // structural constituent of ribosome // inferred from electronic annotation	---
217752_s_at	1.97	0.00206246	CNDP2	CNDP dipeptidase 2 (metallopeptidase M20 family)	149185	6508 // proteolysis // inferred from electronic annotation	4180 // carboxypeptidase activity // inferred from electronic annotation /// 8237 // metallopeptidase activity // inferred from electronic annotation /// 16787 // hydrolase activity // inferred from electronic annotation /// 46983 // protein dimerization activity // inferred from electronic annotation /// 8233 // peptidase activity // inferred from electronic annotation	---
213616_at	1.97	0.00276207	C18orf10	chromosome 18 open reading frame 10	558473	---	---	---
218951_s_at	1.97	0.00295831	PLCXD1	phosphatidylinositol-specific phospholipase C, X domain containing 1	522568	7165 // signal transduction // inferred from electronic annotation /// 7242 // intracellular signaling cascade // inferred from electronic annotation	42978 // ornithine decarboxylase activator activity // inferred from sequence or structural similarity /// 4629 // phospholipase C activity // inferred from electronic annotation	---
201719_s_at	1.97	0.00352739	EPB41L2	erythrocyte membrane protein band 4.1-like 2	486470	30866 // cortical actin cytoskeleton organization and biogenesis // inferred from electronic annotation	3779 // actin binding // inferred from electronic annotation /// 5198 // structural molecule activity // inferred from electronic annotation /// 5200 // structural constituent of cytoskeleton // not recorded /// 5488 // binding // inferred from electronic annotation /// 8092 // cytoskeletal protein binding // inferred from electronic annotation	---
203095_at	1.97	0.00485709	MTIF2	mitochondrial translational initiation factor 2	149894	6412 // protein biosynthesis // inferred from electronic annotation /// 6446 // regulation of translational initiation // traceable author statement /// 6413 // translational initiation // inferred from electronic annotation	166 // nucleotide binding // inferred from electronic annotation /// 3743 // translation initiation factor activity // inferred from electronic annotation /// 5525 // GTP binding // inferred from electronic annotation /// 8135 // translation factor activity, nucleic acid binding // traceable author statement	---
1555037_a_at	1.97	0.00880248	IDH1	isocitrate dehydrogenase 1 (NADP+), soluble	11223	5975 // carbohydrate metabolism // traceable author statement /// 6092 // main pathways of carbohydrate metabolism // inferred from electronic annotation /// 6097 // glyoxylate cycle // inferred from electronic annotation /// 6099 // tricarboxylic acid cycle // inferred from electronic annotation /// 6102 // isocitrate metabolism // traceable author statement /// 8152 // metabolism // inferred fr…	4450 // isocitrate dehydrogenase (NADP+) activity // inferred from electronic annotation /// 4450 // isocitrate dehydrogenase (NADP+) activity // traceable author statement /// 16491 // oxidoreductase activity // inferred from electronic annotation /// 16652 // oxidoreductase activity, acting on NADH or NADPH, NAD or NADP as acceptor // inferred from electronic annotation	Citrate cycle (TCA cycle) // KEGG /// Glutathione metabolism // KEGG /// Reductive carboxylate cycle (CO2 fixation) // KEGG
218671_s_at	1.97	0.00949538	ATPIF1	ATPase inhibitory factor 1	590908	6091 // generation of precursor metabolites and energy // traceable author statement /// 45978 // negative regulation of nucleoside metabolism // inferred from electronic annotation	4857 // enzyme inhibitor activity // inferred from electronic annotation /// 4857 // enzyme inhibitor activity // traceable author statement	Electron_Transport_Chain // GenMAPP /// Electron_Transport_Chain // GenMAPP
201036_s_at	1.97	0.0171607	HADHSC	L-3-hydroxyacyl-Coenzyme A dehydrogenase, short chain	438289	6629 // lipid metabolism // inferred from electronic annotation /// 6631 // fatty acid metabolism // inferred from electronic annotation	3857 // 3-hydroxyacyl-CoA dehydrogenase activity // traceable author statement /// 16491 // oxidoreductase activity // inferred from electronic annotation /// 3857 // 3-hydroxyacyl-CoA dehydrogenase activity // inferred from electronic annotation	Fatty_Acid_Degradation // GenMAPP /// Fatty_Acid_Synthesis // GenMAPP /// Mitochondrial_fatty_acid_betaoxidation // GenMAPP
1553689_s_at	1.97	0.0185665	METTL6	methyltransferase like 6	149487	---	8168 // methyltransferase activity // inferred from electronic annotation /// 16740 // transferase activity // inferred from electronic annotation	---
228286_at	1.97	0.0209055	FLJ40869	hypothetical protein FLJ40869	467793	6281 // DNA repair // inferred from electronic annotation	4518 // nuclease activity // inferred from electronic annotation	---
209916_at	1.97	0.0298405	DHTKD1	dehydrogenase E1 and transketolase domain containing 1	104980	8152 // metabolism // inferred from electronic annotation /// 6096 // glycolysis // inferred from electronic annotation	16624 // oxidoreductase activity, acting on the aldehyde or oxo group of donors, disulfide as acceptor // inferred from electronic annotation /// 4591 // oxoglutarate dehydrogenase (succinyl-transferring) activity // inferred from electronic annotation /// 30976 // thiamin pyrophosphate binding // inferred from electronic annotation	---
215711_s_at	1.97	0.0337128	WEE1	WEE1 homolog (S. pombe)	249441	74 // regulation of progression through cell cycle // traceable author statement /// 6468 // protein amino acid phosphorylation // inferred from electronic annotation /// 7049 // cell cycle // inferred from electronic annotation /// 7067 // mitosis // inferred from electronic annotation /// 51301 // cell division // inferred from electronic annotation	166 // nucleotide binding // inferred from electronic annotation /// 4674 // protein serine/threonine kinase activity // inferred from electronic annotation /// 4713 // protein-tyrosine kinase activity // traceable author statement /// 5515 // protein binding // inferred from physical interaction /// 5524 // ATP binding // inferred from electronic annotation /// 16740 // transferase activity // i…	Cell_cycle_KEGG // GenMAPP /// G1_to_S_cell_cycle_Reactome // GenMAPP /// Cell_cycle_KEGG // GenMAPP /// G1_to_S_cell_cycle_Reactome // GenMAPP /// Calcium signaling pathway // KEGG /// Cytokine-cytokine receptor interaction // KEGG /// Apoptosis // KEGG /// Dorso-ventral axis formation // KEGG /// Axon guidance // KEGG /// VEGF signaling pathway // KEGG /// Focal adhesion // KEGG /// Adherens ju…
201024_x_at	1.97	0.0431468	EIF5B	eukaryotic translation initiation factor 5B	158688	6412 // protein biosynthesis // inferred from electronic annotation /// 6446 // regulation of translational initiation // non-traceable author statement /// 6413 // translational initiation // inferred from electronic annotation	166 // nucleotide binding // inferred from electronic annotation /// 3743 // translation initiation factor activity // non-traceable author statement /// 5515 // protein binding // inferred from physical interaction /// 5525 // GTP binding // inferred from electronic annotation /// 3743 // translation initiation factor activity // inferred from electronic annotation	Translation_Factors // GenMAPP /// Translation_Factors // GenMAPP
238559_at	1.97	0.0479807	---	CDNA clone IMAGE:5266242	187018	---	---	---
202218_s_at	1.96	0.00157335	FADS2	fatty acid desaturase 2	502745	6633 // fatty acid biosynthesis // inferred from electronic annotation /// 6636 // fatty acid desaturation // inferred from electronic annotation /// 6636 // fatty acid desaturation // traceable author statement	5506 // iron ion binding // inferred from electronic annotation /// 16491 // oxidoreductase activity // inferred from electronic annotation /// 16717 // oxidoreductase activity, acting on paired donors, with oxidation of a pair of donors resulting in the reduction of molecular oxygen to two molecules of water // inferred from electronic annotation /// 20037 // heme binding // inferred from electr…	---
218481_at	1.96	0.00211636	EXOSC5	exosome component 5	283741	6364 // rRNA processing // non-traceable author statement /// 6396 // RNA processing // inferred from electronic annotation /// 6364 // rRNA processing // inferred from electronic annotation	175 // 3'-5'-exoribonuclease activity // non-traceable author statement /// 3723 // RNA binding // inferred from electronic annotation /// 4527 // exonuclease activity // inferred from electronic annotation /// 5515 // protein binding // inferred from physical interaction /// 16787 // hydrolase activity // inferred from electronic annotation /// 175 // 3'-5'-exoribonuclease activity // inferred f…	---
202645_s_at	1.96	0.00354698	MEN1	multiple endocrine neoplasia I	423348	122 // negative regulation of transcription from RNA polymerase II promoter // traceable author statement /// 6355 // regulation of transcription, DNA-dependent // traceable author statement	5515 // protein binding // inferred from physical interaction /// 5515 // protein binding // inferred from direct assay /// 5515 // protein binding // traceable author statement	---
202468_s_at	1.96	0.00406837	CTNNAL1	catenin (cadherin-associated protein), alpha-like 1	58488	6915 // apoptosis // not recorded /// 7155 // cell adhesion // inferred from electronic annotation	5198 // structural molecule activity // inferred from electronic annotation /// 45296 // cadherin binding // inferred from electronic annotation	---
202567_at	1.96	0.00483336	SNRPD3	small nuclear ribonucleoprotein D3 polypeptide 18kDa	---	398 // nuclear mRNA splicing, via spliceosome // inferred from electronic annotation /// 6397 // mRNA processing // inferred from electronic annotation /// 16071 // mRNA metabolism // inferred from electronic annotation	5515 // protein binding // inferred from physical interaction	mRNA_processing_Reactome // GenMAPP /// mRNA_processing_binding_Reactome // GenMAPP
218571_s_at	1.96	0.00506305	CHMP4A	chromatin modifying protein 4A	279761	15031 // protein transport // inferred from electronic annotation /// 6810 // transport // inferred from electronic annotation	8289 // lipid binding // inferred from electronic annotation	---
229099_at	1.96	0.00631211	---	CDNA clone MGC:87549 IMAGE:30347387	569010	---	---	---
224869_s_at	1.96	0.00684443	MRPS25	mitochondrial ribosomal protein S25	555973	6412 // protein biosynthesis // non-traceable author statement	3676 // nucleic acid binding // inferred from electronic annotation /// 3735 // structural constituent of ribosome // non-traceable author statement	---
223024_at	1.96	0.00887252	AP1M1	adaptor-related protein complex 1, mu 1 subunit	71040	6886 // intracellular protein transport // inferred from electronic annotation /// 6810 // transport // inferred from electronic annotation /// 15031 // protein transport // inferred from electronic annotation	5515 // protein binding // inferred from physical interaction	---
224729_s_at	1.96	0.0102121	ATPAF1	ATP synthase mitochondrial F1 complex assembly factor 1	632393	6461 // protein complex assembly // inferred from electronic annotation	---	---
1555590_a_at	1.96	0.0104392	GATA1	GATA binding protein 1 (globin transcription factor 1)	765	6350 // transcription // inferred from electronic annotation /// 6357 // regulation of transcription from RNA polymerase II promoter // traceable author statement /// 7275 // development // traceable author statement /// 6355 // regulation of transcription, DNA-dependent // inferred from electronic annotation	3700 // transcription factor activity // traceable author statement /// 8270 // zinc ion binding // inferred from electronic annotation /// 43565 // sequence-specific DNA binding // inferred from electronic annotation /// 46872 // metal ion binding // inferred from electronic annotation /// 3677 // DNA binding // inferred from electronic annotation /// 3700 // transcription factor activity // inf…	---
227046_at	1.96	0.012085	SLC39A11	solute carrier family 39 (metal ion transporter), member 11	221127	30001 // metal ion transport // inferred from electronic annotation	46873 // metal ion transporter activity // inferred from electronic annotation	---
217834_s_at	1.96	0.0240219	SYNCRIP	synaptotagmin binding, cytoplasmic RNA interacting protein	571177	398 // nuclear mRNA splicing, via spliceosome // inferred from electronic annotation /// 8380 // RNA splicing // traceable author statement /// 6397 // mRNA processing // inferred from electronic annotation /// 6396 // RNA processing // traceable author statement	166 // nucleotide binding // inferred from electronic annotation /// 3723 // RNA binding // traceable author statement /// 3676 // nucleic acid binding // inferred from electronic annotation /// 3723 // RNA binding // inferred from electronic annotation	---
205091_x_at	1.96	0.0240505	RECQL	RecQ protein-like (DNA helicase Q1-like)	235069	6281 // DNA repair // traceable author statement /// 6310 // DNA recombination // inferred from electronic annotation	166 // nucleotide binding // inferred from electronic annotation /// 3677 // DNA binding // inferred from electronic annotation /// 4003 // ATP-dependent DNA helicase activity // traceable author statement /// 5515 // protein binding // inferred from physical interaction /// 5524 // ATP binding // inferred from electronic annotation /// 16787 // hydrolase activity // inferred from electronic anno…	---
209735_at	1.96	0.0277561	ABCG2	ATP-binding cassette, sub-family G (WHITE), member 2	480218	6810 // transport // traceable author statement /// 42493 // response to drug // traceable author statement /// 6810 // transport // inferred from electronic annotation	166 // nucleotide binding // inferred from electronic annotation /// 5215 // transporter activity // traceable author statement /// 5524 // ATP binding // traceable author statement /// 8559 // xenobiotic-transporting ATPase activity // traceable author statement /// 16887 // ATPase activity // inferred from electronic annotation /// 5524 // ATP binding // inferred from electronic annotation /// …	Irinotecan_pathway_PharmGKB // GenMAPP
225994_at	1.96	0.0373319	CPSF2	cleavage and polyadenylation specific factor 2, 100kDa	598774	6397 // mRNA processing // inferred from electronic annotation	3723 // RNA binding // inferred from electronic annotation	mRNA_processing_Reactome // GenMAPP
201022_s_at	1.95	0.00201091	DSTN	destrin (actin depolymerizing factor)	304192	---	3779 // actin binding // inferred from electronic annotation	---
208919_s_at	1.95	0.00282131	NADK	NAD kinase	---	8152 // metabolism // inferred from electronic annotation /// 16310 // phosphorylation // non-traceable author statement /// 46034 // ATP metabolism // non-traceable author statement	3951 // NAD+ kinase activity // inferred from direct assay /// 3951 // NAD+ kinase activity // inferred from electronic annotation /// 16301 // kinase activity // inferred from electronic annotation /// 16740 // transferase activity // inferred from electronic annotation /// 46872 // metal ion binding // inferred from electronic annotation	---
222730_s_at	1.95	0.00690825	ZDHHC2	zinc finger, DHHC-type containing 2	443852	---	8270 // zinc ion binding // inferred from electronic annotation /// 8415 // acyltransferase activity // inferred from electronic annotation /// 16740 // transferase activity // inferred from electronic annotation /// 46872 // metal ion binding // inferred from electronic annotation	---
212405_s_at	1.95	0.00887252	KIAA0859	KIAA0859	494705	---	---	---
204682_at	1.95	0.0163049	LTBP2	latent transforming growth factor beta binding protein 2	512776	74 // regulation of progression through cell cycle // non-traceable author statement /// 6605 // protein targeting // traceable author statement /// 6858 // extracellular transport // not recorded /// 7179 // transforming growth factor beta receptor signaling pathway // traceable author statement /// 9306 // protein secretion // traceable author statement	5509 // calcium ion binding // inferred from electronic annotation /// 19838 // growth factor binding // inferred from electronic annotation /// 5515 // protein binding // traceable author statement	---
200616_s_at	1.95	0.019557	KIAA0152	KIAA0152	507074	---	---	---
225348_at	1.95	0.0212289	LOC642558	similar to FUS interacting protein (serine-arginine rich) 1	---	6376 // mRNA splice site selection // inferred from sequence or structural similarity /// 45449 // regulation of transcription // inferred from sequence or structural similarity /// 398 // nuclear mRNA splicing, via spliceosome // inferred from direct assay /// 6376 // mRNA splice site selection // inferred from direct assay /// 16482 // cytoplasmic transport // inferred from direct assay /// 480…	5515 // protein binding // inferred from physical interaction /// 3723 // RNA binding // inferred from sequence or structural similarity /// 5515 // protein binding // inferred from sequence or structural similarity /// 31202 // RNA splicing factor activity, transesterification mechanism // inferred from direct assay /// 166 // nucleotide binding // inferred from electronic annotation /// 3676 //…	mRNA_processing_Reactome // GenMAPP
218719_s_at	1.95	0.0245637	GINS3	GINS complex subunit 3 (Psf3 homolog)	47125	---	---	---
222685_at	1.95	0.0256966	FAM29A	family with sequence similarity 29, member A	533468	---	---	---
51146_at	1.95	0.0283294	GFRA1 /// PIGV	GDNF family receptor alpha 1 /// phosphatidylinositol glycan anchor biosynthesis, class V	259605	7166 // cell surface receptor linked signal transduction // non-traceable author statement /// 6506 // GPI anchor biosynthesis // inferred from electronic annotation	4872 // receptor activity // non-traceable author statement /// 5102 // receptor binding // traceable author statement /// 16167 // glial cell line-derived neurotrophic factor receptor activity // traceable author statement /// 48503 // GPI anchor binding // inferred from electronic annotation /// 4872 // receptor activity // inferred from electronic annotation /// 4376 // glycolipid mannosyltran…	Circadian_Exercise // GenMAPP
219467_at	1.95	0.0294259	FLJ20125	hypothetical protein FLJ20125	24088	15074 // DNA integration // inferred from electronic annotation	3677 // DNA binding // inferred from electronic annotation	---
218588_s_at	1.95	0.0408121	C5orf3	chromosome 5 open reading frame 3	166551	---	17076 // purine nucleotide binding // non-traceable author statement	---
219546_at	1.95	0.0432443	BMP2K	BMP2 inducible kinase	146551	6468 // protein amino acid phosphorylation // inferred from electronic annotation	166 // nucleotide binding // inferred from electronic annotation /// 4674 // protein serine/threonine kinase activity // inferred from electronic annotation /// 5524 // ATP binding // inferred from electronic annotation /// 16740 // transferase activity // inferred from electronic annotation /// 4672 // protein kinase activity // inferred from electronic annotation /// 16301 // kinase activity //…	---
201520_s_at	1.94	0.00181181	GRSF1	G-rich RNA sequence binding factor 1	309763	6378 // mRNA polyadenylylation // traceable author statement	166 // nucleotide binding // inferred from electronic annotation /// 3723 // RNA binding // inferred from electronic annotation /// 3729 // mRNA binding // traceable author statement /// 3676 // nucleic acid binding // inferred from electronic annotation /// 3723 // RNA binding // traceable author statement	---
200687_s_at	1.94	0.00210688	SF3B3	splicing factor 3b, subunit 3, 130kDa	514435	398 // nuclear mRNA splicing, via spliceosome // inferred from electronic annotation /// 6461 // protein complex assembly // traceable author statement /// 8380 // RNA splicing // traceable author statement /// 6397 // mRNA processing // inferred from electronic annotation /// 6397 // mRNA processing // traceable author statement	3676 // nucleic acid binding // inferred from electronic annotation /// 5515 // protein binding // inferred from physical interaction /// 31202 // RNA splicing factor activity, transesterification mechanism // traceable author statement	---
201913_s_at	1.94	0.00341416	COASY	Coenzyme A synthase	296422	9058 // biosynthesis // inferred from electronic annotation /// 15937 // coenzyme A biosynthesis // traceable author statement /// 15937 // coenzyme A biosynthesis // inferred from electronic annotation	166 // nucleotide binding // inferred from electronic annotation /// 4140 // dephospho-CoA kinase activity // inferred from direct assay /// 4595 // pantetheine-phosphate adenylyltransferase activity // inferred from direct assay /// 5524 // ATP binding // inferred from electronic annotation /// 16740 // transferase activity // inferred from electronic annotation /// 3824 // catalytic activity //…	Pantothenate and CoA biosynthesis // KEGG
224796_at	1.94	0.00352739	DDEF1	development and differentiation enhancing factor 1	106015	43087 // regulation of GTPase activity // inferred from electronic annotation	5096 // GTPase activator activity // inferred from electronic annotation /// 5515 // protein binding // inferred from physical interaction /// 8270 // zinc ion binding // inferred from electronic annotation /// 46872 // metal ion binding // inferred from electronic annotation	---
202857_at	1.94	0.00414615	U2AF1	U2 small nuclear RNA auxiliary factor 1	365116	398 // nuclear mRNA splicing, via spliceosome // Unknown /// 8380 // RNA splicing // traceable author statement /// 398 // nuclear mRNA splicing, via spliceosome // inferred from electronic annotation /// 6397 // mRNA processing // inferred from electronic annotation /// 6397 // mRNA processing // traceable author statement	166 // nucleotide binding // inferred from electronic annotation /// 3723 // RNA binding // inferred from electronic annotation /// 5515 // protein binding // inferred from physical interaction /// 8270 // zinc ion binding // inferred from electronic annotation /// 46872 // metal ion binding // inferred from electronic annotation /// 3676 // nucleic acid binding // inferred from electronic annota…	mRNA_processing_Reactome // GenMAPP /// mRNA_processing_Reactome // GenMAPP
223151_at	1.94	0.00565306	DCUN1D5	DCN1, defective in cullin neddylation 1, domain containing 5 (S. cerevisiae)	503716	---	---	---
223086_x_at	1.94	0.00593797	MRPL51	mitochondrial ribosomal protein L51	55847	---	---	---
208972_s_at	1.94	0.00614998	ATP5G1	ATP synthase, H+ transporting, mitochondrial F0 complex, subunit C1 (subunit 9)	80986	6811 // ion transport // inferred from electronic annotation /// 15986 // ATP synthesis coupled proton transport // inferred from electronic annotation /// 15992 // proton transport // inferred from electronic annotation /// 6810 // transport // inferred from electronic annotation	5215 // transporter activity // non-traceable author statement /// 8289 // lipid binding // inferred from electronic annotation /// 46933 // hydrogen-transporting ATP synthase activity, rotational mechanism // inferred from electronic annotation /// 46961 // hydrogen-transporting ATPase activity, rotational mechanism // inferred from electronic annotation /// 15078 // hydrogen ion transporter act…	Electron_Transport_Chain // GenMAPP /// Oxidative phosphorylation // KEGG /// ATP synthesis // KEGG /// Photosynthesis // KEGG /// Flagellar assembly // KEGG /// Type III secretion system // KEGG /// Epithelial cell signaling in Helicobacter pylori // KEGG /// Purine metabolism // KEGG
233334_x_at	1.94	0.00641122	SULT1A3 /// GIYD2 /// SULT1A4 /// GIYD1 /// LOC644122	sulfotransferase family, cytosolic, 1A, phenol-preferring, member 3 /// GIY-YIG domain containing 2 /// sulfotransferase family, cytosolic, 1A, phenol-preferring, member 4 /// GIY-YIG domain containing 1 /// similar to GIY-YIG domain containing 2 isoform 1	460587	6584 // catecholamine metabolism // inferred from electronic annotation /// 6629 // lipid metabolism // inferred from electronic annotation /// 7268 // synaptic transmission // not recorded /// 8202 // steroid metabolism // inferred from electronic annotation /// 6281 // DNA repair // inferred from electronic annotation	4062 // aryl sulfotransferase activity // traceable author statement /// 16740 // transferase activity // inferred from electronic annotation /// 4518 // nuclease activity // inferred from electronic annotation /// 4062 // aryl sulfotransferase activity // inferred from electronic annotation /// 8146 // sulfotransferase activity // inferred from electronic annotation	Sulfur metabolism // KEGG
224723_x_at	1.94	0.00654129	LOC401397	hypothetical LOC401397	117929	---	---	---
202605_at	1.94	0.0134813	GUSB	glucuronidase, beta	255230	5975 // carbohydrate metabolism // traceable author statement /// 6027 // glycosaminoglycan catabolism // traceable author statement /// 5975 // carbohydrate metabolism // inferred from electronic annotation /// 30203 // glycosaminoglycan metabolism // inferred from electronic annotation	4566 // beta-glucuronidase activity // traceable author statement /// 43169 // cation binding // inferred from electronic annotation /// 3824 // catalytic activity // inferred from electronic annotation /// 4553 // hydrolase activity, hydrolyzing O-glycosyl compounds // inferred from electronic annotation /// 4566 // beta-glucuronidase activity // inferred from electronic annotation /// 16787 // …	Pentose and glucuronate interconversions // KEGG /// Starch and sucrose metabolism // KEGG /// Glycosaminoglycan degradation // KEGG /// Porphyrin and chlorophyll metabolism // KEGG /// Glycan structures - degradation // KEGG
208814_at	1.94	0.0164594	HSPA4	Heat shock 70kDa protein 4	90093	6457 // protein folding // inferred from electronic annotation /// 6986 // response to unfolded protein // inferred from electronic annotation /// 6986 // response to unfolded protein // non-traceable author statement	166 // nucleotide binding // inferred from electronic annotation /// 5524 // ATP binding // inferred from electronic annotation /// 5524 // ATP binding // non-traceable author statement	---
212312_at	1.94	0.0167484	BCL2L1	BCL2-like 1 /// BCL2-like 1	516966	6916 // anti-apoptosis // traceable author statement /// 8634 // negative regulation of survival gene product activity // traceable author statement /// 8637 // apoptotic mitochondrial changes // traceable author statement /// 42981 // regulation of apoptosis // inferred from electronic annotation /// 6915 // apoptosis // inferred from electronic annotation /// 6915 // apoptosis // traceable auth…	42802 // identical protein binding // inferred from physical interaction /// 5515 // protein binding // inferred from physical interaction	Apoptosis // GenMAPP /// Apoptosis_GenMAPP // GenMAPP /// Apoptosis_KEGG // GenMAPP
1555758_a_at	1.94	0.0272214	CDKN3	cyclin-dependent kinase inhibitor 3 (CDK2-associated dual specificity phosphatase)	84113	79 // regulation of cyclin-dependent protein kinase activity // traceable author statement /// 82 // G1/S transition of mitotic cell cycle // traceable author statement /// 6470 // protein amino acid dephosphorylation // inferred from electronic annotation /// 7049 // cell cycle // inferred from electronic annotation /// 7050 // cell cycle arrest // traceable author statement /// 8285 // negative…	4725 // protein tyrosine phosphatase activity // inferred from electronic annotation /// 8138 // protein tyrosine/serine/threonine phosphatase activity // traceable author statement /// 16787 // hydrolase activity // inferred from electronic annotation /// 4721 // phosphoprotein phosphatase activity // inferred from electronic annotation /// 16301 // kinase activity // inferred from electronic an…	---
205222_at	1.94	0.0287793	EHHADH	enoyl-Coenzyme A, hydratase/3-hydroxyacyl Coenzyme A dehydrogenase	429879	6091 // generation of precursor metabolites and energy // not recorded /// 6629 // lipid metabolism // inferred from electronic annotation /// 6631 // fatty acid metabolism // inferred from electronic annotation /// 8152 // metabolism // inferred from electronic annotation	3857 // 3-hydroxyacyl-CoA dehydrogenase activity // traceable author statement /// 4165 // dodecenoyl-CoA delta-isomerase activity // inferred from electronic annotation /// 4300 // enoyl-CoA hydratase activity // traceable author statement /// 16491 // oxidoreductase activity // inferred from electronic annotation /// 16829 // lyase activity // inferred from electronic annotation /// 16853 // is…	Mitochondrial_fatty_acid_betaoxidation // GenMAPP /// Fatty acid elongation in mitochondria // KEGG /// Fatty acid metabolism // KEGG /// Valine, leucine and isoleucine degradation // KEGG /// Lysine degradation // KEGG /// Tryptophan metabolism // KEGG /// beta-Alanine metabolism // KEGG /// Benzoate degradation via CoA ligation // KEGG /// Propanoate metabolism // KEGG /// Butanoate metabolism …
212983_at	1.93	0.000892962	HRAS	v-Ha-ras Harvey rat sarcoma viral oncogene homolog	37003	74 // regulation of progression through cell cycle // non-traceable author statement /// 6928 // cell motility // not recorded /// 6935 // chemotaxis // traceable author statement /// 7166 // cell surface receptor linked signal transduction // traceable author statement /// 7264 // small GTPase mediated signal transduction // inferred from electronic annotation /// 9887 // organ morphogenesis // …	166 // nucleotide binding // inferred from electronic annotation /// 3924 // GTPase activity // not recorded /// 5525 // GTP binding // inferred from electronic annotation /// 8022 // protein C-terminus binding // inferred from physical interaction /// 5515 // protein binding // inferred from physical interaction	G_Protein_Signaling // GenMAPP /// MAPK_Cascade // GenMAPP /// TGF_Beta_Signaling_Pathway // GenMAPP /// G_Protein_Signaling // GenMAPP /// MAPK_Cascade // GenMAPP /// TGF_Beta_Signaling_Pathway // GenMAPP
201478_s_at	1.93	0.00327235	DKC1	dyskeratosis congenita 1, dyskerin	4747	74 // regulation of progression through cell cycle // traceable author statement /// 6364 // rRNA processing // traceable author statement /// 7004 // telomere maintenance via telomerase // traceable author statement /// 8283 // cell proliferation // traceable author statement /// 6364 // rRNA processing // inferred from electronic annotation /// 6396 // RNA processing // inferred from electronic…	3720 // telomerase activity // inferred from direct assay /// 3723 // RNA binding // traceable author statement /// 4730 // pseudouridylate synthase activity // inferred from electronic annotation /// 16853 // isomerase activity // inferred from electronic annotation /// 3723 // RNA binding // inferred from electronic annotation	---
217832_at	1.93	0.00416814	SYNCRIP	synaptotagmin binding, cytoplasmic RNA interacting protein	571177	398 // nuclear mRNA splicing, via spliceosome // inferred from electronic annotation /// 8380 // RNA splicing // traceable author statement /// 6397 // mRNA processing // inferred from electronic annotation /// 6396 // RNA processing // traceable author statement	166 // nucleotide binding // inferred from electronic annotation /// 3723 // RNA binding // traceable author statement /// 3676 // nucleic acid binding // inferred from electronic annotation /// 3723 // RNA binding // inferred from electronic annotation	---
53071_s_at	1.93	0.00589715	FLJ22222	hypothetical protein FLJ22222	567578	19538 // protein metabolism // inferred from electronic annotation	16706 // oxidoreductase activity, acting on paired donors, with incorporation or reduction of molecular oxygen, 2-oxoglutarate as one donor, and incorporation of one atom each of oxygen into both donors // inferred from electronic annotation	---
219709_x_at	1.93	0.00626338	C16orf24	chromosome 16 open reading frame 24	166244	---	---	---
223414_s_at	1.93	0.00661278	LYAR	hypothetical protein FLJ20425	425427	---	8270 // zinc ion binding // inferred from electronic annotation /// 46872 // metal ion binding // inferred from electronic annotation	---
203524_s_at	1.93	0.00893545	MPST	mercaptopyruvate sulfurtransferase	248267	8272 // sulfate transport // inferred from electronic annotation /// 9440 // cyanate catabolism // traceable author statement /// 9636 // response to toxin // traceable author statement	4792 // thiosulfate sulfurtransferase activity // inferred from electronic annotation /// 4792 // thiosulfate sulfurtransferase activity // traceable author statement /// 16740 // transferase activity // inferred from electronic annotation /// 16784 // 3-mercaptopyruvate sulfurtransferase activity // inferred from electronic annotation	Cysteine metabolism // KEGG
203704_s_at	1.93	0.00903325	---	---	---	---	---	---
203192_at	1.93	0.0124537	ABCB6	ATP-binding cassette, sub-family B (MDR/TAP), member 6	107911	6810 // transport // inferred from direct assay /// 6810 // transport // inferred from electronic annotation /// 6879 // iron ion homeostasis // non-traceable author statement /// 45 // autophagic vacuole formation // inferred from mutant phenotype /// 6118 // electron transport // inferred from electronic annotation /// 6512 // ubiquitin cycle // inferred from electronic annotation /// 6914 // a…	166 // nucleotide binding // inferred from electronic annotation /// 5524 // ATP binding // inferred from direct assay /// 5524 // ATP binding // inferred from electronic annotation /// 16887 // ATPase activity // inferred from electronic annotation /// 42626 // ATPase activity, coupled to transmembrane movement of substances // inferred from electronic annotation /// 17111 // nucleoside-triphosp…	---
203856_at	1.93	0.0164594	VRK1	vaccinia related kinase 1	422662	6468 // protein amino acid phosphorylation // traceable author statement /// 6468 // protein amino acid phosphorylation // inferred from electronic annotation	166 // nucleotide binding // inferred from electronic annotation /// 4674 // protein serine/threonine kinase activity // traceable author statement /// 5524 // ATP binding // inferred from electronic annotation /// 16740 // transferase activity // inferred from electronic annotation /// 4672 // protein kinase activity // inferred from electronic annotation /// 4674 // protein serine/threonine kin…	---
201274_at	1.93	0.0191559	PSMA5	proteasome (prosome, macropain) subunit, alpha type, 5	632424	6511 // ubiquitin-dependent protein catabolism // inferred from electronic annotation	4298 // threonine endopeptidase activity // inferred from electronic annotation /// 4175 // endopeptidase activity // inferred from electronic annotation /// 8233 // peptidase activity // inferred from electronic annotation /// 16787 // hydrolase activity // inferred from electronic annotation	Proteasome_Degradation // GenMAPP /// Proteasome // KEGG
228868_x_at	1.93	0.0208506	CDT1	DNA replication factor	122908	76 // DNA replication checkpoint // inferred from direct assay /// 6260 // DNA replication // inferred from electronic annotation /// 7049 // cell cycle // inferred from electronic annotation /// 30174 // regulation of DNA replication initiation // inferred from direct assay	3677 // DNA binding // inferred from sequence or structural similarity /// 5515 // protein binding // inferred from physical interaction /// 3677 // DNA binding // inferred from electronic annotation	DNA_replication_Reactome // GenMAPP
230092_at	1.93	0.0292217	---	---	---	---	---	---
215136_s_at	1.93	0.0429546	EXOSC8	exosome component 8	294041	6364 // rRNA processing // inferred from electronic annotation /// 6396 // RNA processing // inferred from electronic annotation	175 // 3'-5'-exoribonuclease activity // inferred from electronic annotation /// 3723 // RNA binding // inferred from electronic annotation /// 4527 // exonuclease activity // inferred from electronic annotation /// 16787 // hydrolase activity // inferred from electronic annotation /// 42802 // identical protein binding // inferred from physical interaction /// 5515 // protein binding // inferred…	---
211047_x_at	1.92	0.0010895	AP2S1	adaptor-related protein complex 2, sigma 1 subunit /// adaptor-related protein complex 2, sigma 1 subunit	119591	6810 // transport // inferred from electronic annotation /// 6886 // intracellular protein transport // inferred from electronic annotation /// 30100 // regulation of endocytosis // traceable author statement /// 48268 // clathrin cage assembly // traceable author statement /// 16260 // selenocysteine biosynthesis // non-traceable author statement	8565 // protein transporter activity // non-traceable author statement /// 3824 // catalytic activity // inferred from electronic annotation /// 4756 // selenide, water dikinase activity // inferred from electronic annotation /// 5524 // ATP binding // inferred from electronic annotation /// 16301 // kinase activity // inferred from electronic annotation /// 166 // nucleotide binding // inferred …	---
223591_at	1.92	0.00164362	RNF135	ring finger protein 135	29874	---	5515 // protein binding // inferred from electronic annotation /// 8270 // zinc ion binding // inferred from electronic annotation /// 46872 // metal ion binding // inferred from electronic annotation	---
225083_at	1.92	0.00241877	C6orf51	chromosome 6 open reading frame 51	418520	---	---	---
226060_at	1.92	0.00268938	RFT1	RFT1 homolog (S. cerevisiae)	631910	280 // nuclear division // inferred from electronic annotation /// 6869 // lipid transport // inferred from electronic annotation	5319 // lipid transporter activity // inferred from electronic annotation	---
1554553_s_at	1.92	0.0028188	YIF1B	Yip1 interacting factor homolog B (S. cerevisiae)	280741	---	---	---
226073_at	1.92	0.00465073	LOC219854	hypothetical protein LOC219854	7626	---	---	---
203613_s_at	1.92	0.00494999	NDUFB6	NADH dehydrogenase (ubiquinone) 1 beta subcomplex, 6, 17kDa	493668	6120 // mitochondrial electron transport, NADH to ubiquinone // traceable author statement	3954 // NADH dehydrogenase activity // inferred from electronic annotation /// 8137 // NADH dehydrogenase (ubiquinone) activity // traceable author statement /// 16491 // oxidoreductase activity // inferred from electronic annotation /// 8137 // NADH dehydrogenase (ubiquinone) activity // inferred from electronic annotation	Electron_Transport_Chain // GenMAPP /// Oxidative phosphorylation // KEGG /// Ubiquinone biosynthesis // KEGG /// Oxidative phosphorylation // KEGG
210005_at	1.92	0.00678697	GART	phosphoribosylglycinamide formyltransferase, phosphoribosylglycinamide synthetase, phosphoribosylaminoimidazole synthetase	473648	6164 // purine nucleotide biosynthesis // inferred from electronic annotation /// 6189 // 'de novo' IMP biosynthesis // inferred from electronic annotation /// 9058 // biosynthesis // inferred from electronic annotation /// 9113 // purine base biosynthesis // inferred from electronic annotation	166 // nucleotide binding // inferred from electronic annotation /// 3824 // catalytic activity // inferred from electronic annotation /// 4637 // phosphoribosylamine-glycine ligase activity // inferred from electronic annotation /// 4641 // phosphoribosylformylglycinamidine cyclo-ligase activity // inferred from electronic annotation /// 4644 // phosphoribosylglycinamide formyltransferase activi…	Purine metabolism // KEGG /// Purine metabolism // KEGG /// One carbon pool by folate // KEGG /// Purine metabolism // KEGG
212971_at	1.92	0.0105989	CARS	cysteinyl-tRNA synthetase	274873	6412 // protein biosynthesis // inferred from electronic annotation /// 6423 // cysteinyl-tRNA aminoacylation // inferred from electronic annotation /// 6412 // protein biosynthesis // not recorded	49 // tRNA binding // traceable author statement /// 166 // nucleotide binding // inferred from electronic annotation /// 4817 // cysteine-tRNA ligase activity // inferred from electronic annotation /// 4872 // receptor activity // inferred from electronic annotation /// 5524 // ATP binding // inferred from electronic annotation /// 8270 // zinc ion binding // inferred from electronic annotation …	Cysteine metabolism // KEGG /// Aminoacyl-tRNA biosynthesis // KEGG
223666_at	1.92	0.0142284	SNX5	Sorting nexin 5	590882	7242 // intracellular signaling cascade // inferred from electronic annotation /// 15031 // protein transport // inferred from electronic annotation /// 6810 // transport // inferred from electronic annotation	5515 // protein binding // inferred from electronic annotation /// 35091 // phosphoinositide binding // inferred from electronic annotation	---
201569_s_at	1.92	0.0145097	SAMM50	sorting and assembly machinery component 50 homolog (S. cerevisiae)	505824	---	---	---
226240_at	1.92	0.0209899	MGC21874	transcriptional adaptor 2 (ADA2 homolog, yeast)-beta	518614	45449 // regulation of transcription // inferred from electronic annotation	3677 // DNA binding // inferred from electronic annotation /// 8270 // zinc ion binding // inferred from electronic annotation	---
210970_s_at	1.92	0.0252668	IBTK	inhibitor of Bruton agammaglobulinemia tyrosine kinase	306425	---	16301 // kinase activity // inferred from electronic annotation /// 5515 // protein binding // inferred from electronic annotation	---
215471_s_at	1.92	0.0257743	MAP7	microtubule-associated protein 7	486548	226 // microtubule cytoskeleton organization and biogenesis // traceable author statement /// 7163 // establishment and/or maintenance of cell polarity // traceable author statement	5198 // structural molecule activity // traceable author statement	---
200046_at	1.92	0.0338269	DAD1	defender against cell death 1 /// defender against cell death 1	82890	6915 // apoptosis // inferred from electronic annotation /// 18279 // protein amino acid N-linked glycosylation via asparagine // Unknown	4579 // dolichyl-diphosphooligosaccharide-protein glycotransferase activity // Unknown /// 16740 // transferase activity // inferred from electronic annotation /// 4579 // dolichyl-diphosphooligosaccharide-protein glycotransferase activity // inferred from electronic annotation	---
218281_at	1.91	0.0040482	MRPL48	mitochondrial ribosomal protein L48	503239	6412 // protein biosynthesis // inferred from electronic annotation	3735 // structural constituent of ribosome // inferred from electronic annotation	---
231984_at	1.91	0.00636208	MTAP	methylthioadenosine phosphorylase	193268	6139 // nucleobase, nucleoside, nucleotide and nucleic acid metabolism // traceable author statement	4645 // phosphorylase activity // traceable author statement /// 16763 // transferase activity, transferring pentosyl groups // inferred from electronic annotation /// 17061 // S-methyl-5-thioadenosine phosphorylase activity // inferred from electronic annotation /// 16740 // transferase activity // inferred from electronic annotation /// 16757 // transferase activity, transferring glycosyl group…	---
[truncated: 3,797 more rows]

## Sheet: Down
ProbeID	FChg	qvalue	Gene.Symbol	Gene.Title	unigene	Gene.Ontology.Biological.Process	Gene.Ontology.Molecular.Function	Pathway
204304_s_at	-19.65	0.0102121	PROM1	prominin 1 (CD133)	479220	7601 // visual perception // inferred from electronic annotation /// 50896 // response to stimulus // inferred from electronic annotation	---	---
[truncated: 290 more rows]

## Sheet: Up
ProbeID	FChg	qvalue	Gene.Symbol	Gene.Title	unigene	Gene.Ontology.Biological.Process	Gene.Ontology.Molecular.Function	Pathway
[truncated: 184 more rows]
